# Supplementary material for: Synthesis of cyclopenta[b]benzofurans via biomimetic oxidative phenol–enamine [3 + 2] cycloaddition
Source: Royal Society of Chemistry journal article supplement (doi:10.1039/d2qo01916g), 2023-01-01
Supplement: d2qo01916g1.pdf [file d2qo01916g1.pdf]

## Electronic supplementary information

### Synthesis of Cyclopenta[*b*]benzofurans *via* Biomimetic Oxidative

#### Phenol-Enamine [3+2] Cycloaddition

Muhammad Adnan Bashir,<sup>‡a</sup> Xuanjie Chen,<sup>‡a</sup> Tie Wang,<sup>a</sup> Hui Guo,<sup>b</sup> and Hongbin Zhai<sup>\*a,c,d</sup>

<sup>a</sup>The State Key Laboratory of Chemical Oncogenomics, Guangdong Provincial Key Laboratory of Nano-Micro Materials Research, School of Chemical Biology and Biotechnology, Shenzhen Graduate School of Peking University, Shenzhen 518055, China; Institute of Marine Biomedicine, Shenzhen Polytechnic, Shenzhen 518055, China.

<sup>b</sup>Tsinghua-Berkeley Shenzhen Institute and The Institute of Biopharmaceutical and Health Engineering Tsinghua Shenzhen International Graduate School, Tsinghua University, Shenzhen 518055, People's Republic of China.

<sup>c</sup>Shenzhen Bay Laboratory, Shenzhen 518055, China

<sup>d</sup>Institute of Marine Biomedicine, Shenzhen Polytechnic, Shenzhen 518055, China

\*Email: [zhaih@pku.edu.cn](mailto:zhaih@pku.edu.cn)

## 1. General Information

All reactions involving air or moisture sensitive reagents or intermediates were carried out under an argon atmosphere with dry solvents under anhydrous conditions, unless otherwise noted. Reagents were purchased at the highest commercial quality and used without further purification, unless otherwise stated. Solvent purification was conducted according to Purification of Laboratory Chemicals (Perrin, D. D. Armarego, W. L. and Perrins, D. R., Pergamon Press: Oxford, 1980). Yields refer to isolated compounds, unless otherwise stated. Reactions were monitored by thin-layer chromatography (TLC) carried out on 0.25 mm Tsingdao silica gel plates (60F-254) using Tsingdao silica gel (60, particle size 0.040–0.063 mm). And the silica gel from the same company was also used for flash column chromatography. NMR spectra were recorded on a Brüker AVANCE 400 (1H: 400 MHz, 13C: 101 MHz) or a Brüker AVANCE 500 (1H: 500 MHz, 13C: 126MHz) instrument. Chemical shifts were reported in parts per million (ppm) with respect to the residual solvent signal CDCl<sub>3</sub> (1H NMR:  $\delta$  = 7.26; 13C NMR:  $\delta$  = 77.00). Peak multiplicities were reported as follows: s = singlet, d = doublet, t = triplet, q = quartet, dd = doublet of doublets, td = triplet of doublets, dt = doublet of triplets, ddd = doublet of doublet of doublets, m = multiplet, br = broad signal. High resolution mass spectra (HRMS) were recorded on an Agilent Mass spectrometer using ESI-TOF (electrospray ionization-time of flight) spectrometer.

All the substrates were prepared according to the reported literature methods.<sup>1-6</sup>

## 2. Optimization of Reaction Conditions

**Table S1.** The reaction of **1a** with **2a** under different temperatures

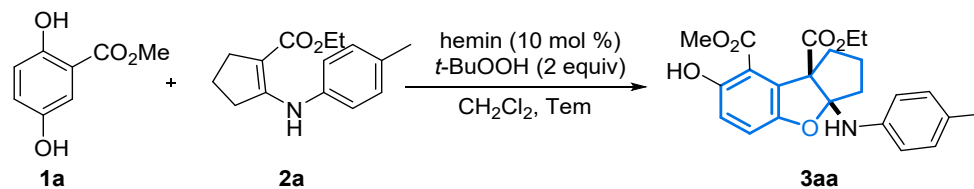

| Entry <sup>a</sup> | Temperature (°C) | Yield <sup>b</sup> (%) |
|--------------------|------------------|------------------------|
| 1                  | 70               | 35                     |
| 2                  | 40               | 68                     |
| 3                  | rt               | 91                     |
| 4                  | 0                | 27                     |
| 5                  | -10              | 20                     |

<sup>a</sup>Reactions were performed with **1a** (0.2 mmol), **2a** (0.3 mmol), catalyst and *t*-BuOOH (0.4 mmol) in DCM (5.0 mL) at different temperatures. <sup>b</sup>Isolated yield.

**Table S2.** The reaction of **1a** with **2a** in different solvents

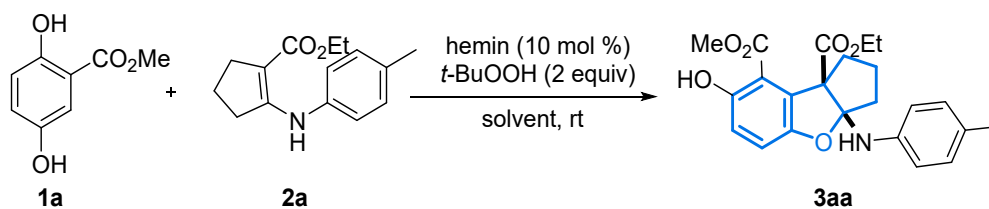

| Entry <sup>a</sup> | Solvent           | Yield <sup>b</sup> (%) |
|--------------------|-------------------|------------------------|
| 1                  | CHCl <sub>3</sub> | 43                     |
| 2                  | DCE               | 61                     |
| 3                  | CCl <sub>4</sub>  | 38                     |
| 4                  | DCM               | 91                     |
| 5                  | Methanol          | 10                     |
| 6                  | Toluene           | 76                     |
| 7                  | Et <sub>2</sub> O | traces                 |
| 8                  | THF               | traces                 |
| 9                  | Acetone           | traces                 |

<sup>a</sup>Reactions were performed with **1a** (0.2 mmol), **2a** (0.3 mmol), catalyst and *t*-BuOOH (0.4 mmol) in solvent (5.0 mL). <sup>b</sup>Isolated yield.

### 3. General Procedure

To a Schlenk flask equipped with magnetic stirrer bar, methyl 2,5-dihydroxybenzoate **1a** (0.2 mmol, 1.0 equiv), ethyl 2-(*p*-tolylamino)cyclopent-1-ene-1-carboxylate **2a** (0.3 mmol, 1.5 equiv), hemin (0.01 mmol, 13.5 mg) and DCM toluene (5.0 mL) were added. After stirring for a while, TBHP (73  $\mu$ L, 2.0 equiv.) was added *via* a microsyringe and the resulted mixture was stirred at room temperature for 24 h. Upon the completion of reaction (monitored by TLC), the mixture was directly subjected to chromatography and purified by flash chromatography on silica gel with petroleum ether/ethyl acetate as an eluent (20:1 to 10:1) to afford the desired product **3aa**.

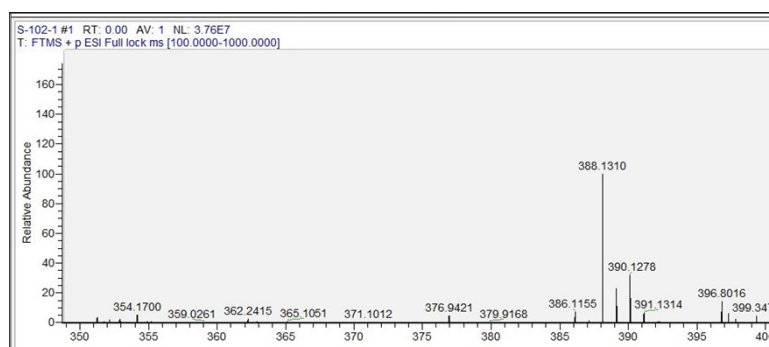

Figure S1. HRMS of **3ca**

### 4. UV-Vis Study

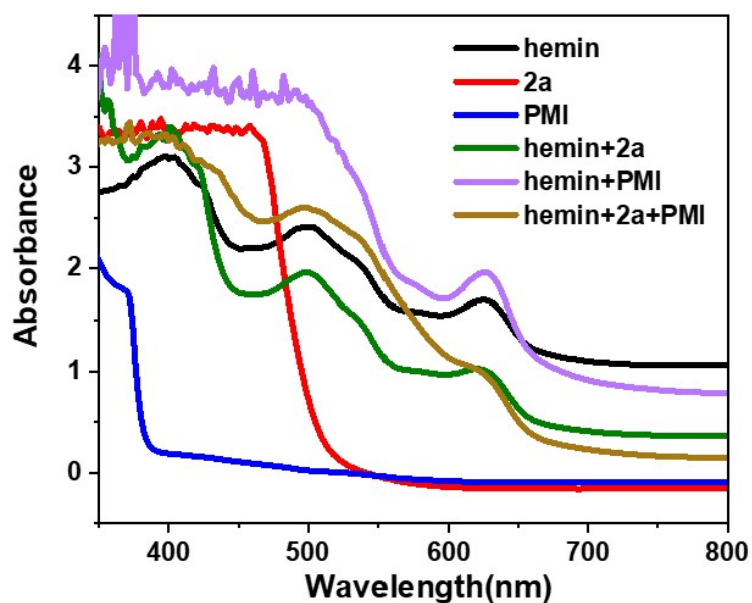

Figure S2. UV-Vis spectrum

## 5. Analytical Data of Products

### 8b-ethyl 8-methyl 7-hydroxy-3a-(*p*-tolylamino)-1,2,3,3a-tetrahydro-8bH-cyclopenta[*b*]benzofuran-8,8b-dicarboxylate 3aa

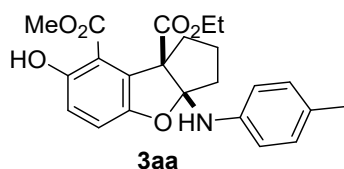

A brown solid, 75 mg, 91% yield.

**m.p.:** 109-110 °C.

**TLC:**  $R_f = 0.45$  (Hexane/EtOAc = 10:1) [UV, PMA].

**$^1\text{H NMR}$**  (400 MHz,  $\text{CDCl}_3$ )  $\delta$  10.54 (s, 1H), 7.06 – 7.00 (d, 2H), 6.98 – 6.95 (d, 1H), 6.94 – 6.86 (m, 3H), 4.64 (s, 1H), 4.25 – 4.08 (m, 2H), 3.85 (s, 3H), 3.12 – 2.98 (m, 1H), 2.49 – 2.42 (m, 1H), 2.28 (s, 3H), 2.23 – 2.14 (m, 1H), 2.01 – 1.94 (m, 1H), 1.92 – 1.85 (m, 1H), 1.72 – 1.63 (m, 1H), 1.22 (t,  $J = 7.1$  Hz, 3H).

**$^{13}\text{C NMR}$**  (126 MHz,  $\text{CDCl}_3$ )  $\delta$  171.9, 169.6, 156.7, 152.3, 140.8, 131.8, 129.3, 129.1, 122.0, 118.3, 117.9, 111.4, 108.4, 68.9, 61.3, 51.4, 39.1, 38.3, 23.9, 20.6, 14.2.

**HRMS (ESI):**  $\text{C}_{23}\text{H}_{26}\text{NO}_6^+$  [(M+H) $^+$ ]: calcd.: 412.1755; found: 412.1755.

### 8b-ethyl 8-methyl 7-hydroxy-3a-(*m*-tolylamino)-1,2,3,3a-tetrahydro-8bH-cyclopenta[*b*]benzofuran-8,8b-dicarboxylate 3ab

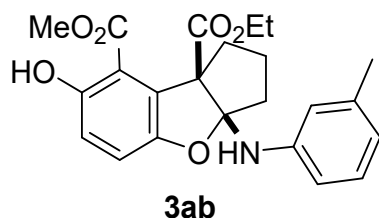

A yellow oil, 68 mg, 83% yield.

**TLC:**  $R_f = 0.54$  (Hexane/EtOAc = 10:1) [UV, PMA].

**$^1\text{H NMR}$**  (500 MHz,  $\text{CDCl}_3$ )  $\delta$  10.55 (s, 1H), 7.16 – 7.07 (s, 1H), 6.98 (d,  $J = 8.8$  Hz, 1H), 6.89 (d,  $J = 8.8$  Hz, 1H), 6.85 – 6.72 (m, 3H), 4.26 – 4.05 (m, 2H), 3.86 (s, 3H), 3.04 (m,  $J = 13.4$ ,

11.0, 6.9 Hz, 1H), 2.63 – 2.50 (m, 1H), 2.30 (s, 3H), 2.22 (ddd,  $J = 13.1, 11.3, 6.5$  Hz, 1H), 2.04 – 1.96 (m, 1H), 1.95 – 1.87 (m, 1H), 1.78 – 1.64 (m, 1H), 1.22 (t,  $J = 7.1$  Hz, 3H).

$^{13}\text{C}$  NMR (126 MHz,  $\text{CDCl}_3$ )  $\delta$  171.9, 169.6, 156.8, 152.3, 143.4, 138.6, 129.1, 128.7, 122.7, 121.7, 118.4, 118.0, 117.9, 111.0, 108.4, 69.1, 61.4, 51.5, 39.3, 38.3, 24.0, 21.5, 14.3.

HRMS (ESI):  $\text{C}_{23}\text{H}_{26}\text{NO}_6^+$  [(M+H) $^+$ ]: calcd.:412.1755; found: 412.1760

**8b-ethyl 8-methyl 7-hydroxy-3a-(*o*-tolylamino)-1,2,3,3a-tetrahydro-8bH-cyclopenta[*b*]benzofuran-8,8b-dicarboxylate 3ac**

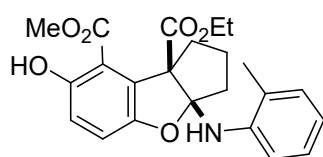

**3ac**

A yellow oil, 66 mg, 80% yield.

TLC:  $R_f = 0.54$  (Hexane/EtOAc = 10:1) [UV, PMA].

$^1\text{H}$  NMR (500 MHz,  $\text{CDCl}_3$ ) 10.54 (s, 1H), 7.32 (dd,  $J = 8.0, 1.3$  Hz, 1H), 7.18 – 7.09 (m, 2H), 6.97 (d,  $J = 8.9$  Hz, 1H), 6.93 – 6.88 (m, 2H), 4.29 (dd,  $J = 10.9, 7.1$  Hz, 1H), 4.11 (dd,  $J = 10.9, 7.2$  Hz, 1H), 3.87 (s, 3H), 3.05 (ddd,  $J = 13.0, 10.3, 6.7$  Hz, 1H), 2.67 – 2.58 (m, 1H), 2.20 (ddd,  $J = 13.1, 10.6, 6.5$  Hz, 1H), 2.12 (s, 3H), 2.01 – 1.90 (m, 2H), 1.80 – 1.69 (m, 1H), 1.23 (t,  $J = 7.2$  Hz, 3H).

$^{13}\text{C}$  NMR (126 MHz,  $\text{CDCl}_3$ )  $\delta$  172.1, 169.6, 156.8, 152.3, 141.7, 130.3, 129.1, 128.9, 126.5, 121.9, 120.4, 118.4, 118.1, 111.0, 108.3, 69.7, 61.6, 51.5, 38.8, 38.1, 24.2, 18.1, 14.2.

HRMS (ESI):  $\text{C}_{23}\text{H}_{26}\text{NO}_6^+$  [(M+H) $^+$ ]: calcd.: 412.1755; found: 412.1760.

**8b-ethyl 8-methyl 7-hydroxy-3a-((4-methoxyphenyl)amino)-1,2,3,3a-tetrahydro-8bH-cyclopenta[*b*]benzofuran-8,8b-dicarboxylate 3ad**

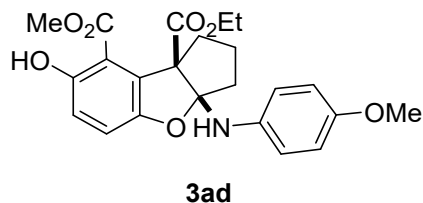

A yellow solid, 79 mg, 92% yield.

**m.p.:** 75-76 °C.

**TLC:**  $R_f = 0.55$  (Hexane/EtOAc = 10:1) [UV, PMA].

**$^1\text{H NMR}$**  (500 MHz,  $\text{CDCl}_3$ )  $\delta$  10.54 (s, 1H), 7.03 (dd,  $J = 8.8$  Hz, 2H), 6.99 (d,  $J = 8.8$  Hz, 1H), 6.89 (d,  $J = 8.8$  Hz, 1H), 6.80 (dd,  $J = 8.8$  Hz, 2H), 4.27 – 4.11 (m, 2H), 3.85 (s, 3H), 3.78 (s, 3H), 3.28 – 2.84 (m, 1H), 2.38 – 2.23 (m, 1H), 2.21 – 2.06 (m, 1H), 2.03 – 1.91 (m, 1H), 1.91 – 1.79 (m, 1H), 1.71 – 1.57 (m, 1H), 1.23 (t,  $J = 7.1$  Hz, 3H).

**$^{13}\text{C NMR}$**  (126 MHz,  $\text{CDCl}_3$ )  $\delta$  171.9, 169.6, 156.7, 156.1, 152.2, 136.4, 129.3, 125.3, 118.3, 117.8, 114.0, 112.1, 108.4, 68.6, 61.3, 55.5, 51.5, 38.7, 38.3, 23.8, 14.3.

**HRMS (ESI):**  $\text{C}_{23}\text{H}_{26}\text{NO}_7^+$  [(M+H) $^+$ ]: calcd.: 428.1704; found: 428.1703

**8b-ethyl 8-methyl 7-hydroxy-3a-(phenylamino)-1,2,3,3a-tetrahydro-8bH-cyclopenta[b]benzofuran-8,8b-dicarboxylate 3ae**

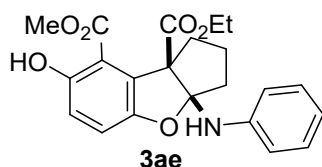

A yellow oil, 69 mg, 87% yield.

**TLC:**  $R_f = 0.45$  (Hexane/EtOAc = 10:1) [UV, PMA].

**$^1\text{H NMR}$**  (400 MHz,  $\text{CDCl}_3$ )  $\delta$  10.47 (s, 1H), 7.17 – 7.08 (m, 2H), 6.89 (m,  $J = 8.7, 6.2$  Hz, 4H), 6.81 (d,  $J = 8.9$  Hz, 1H), 4.73 (s, 1H), 4.13 – 3.97 (m, 2H), 3.77 (s, 3H), 3.02 – 2.90 (m, 1H), 2.52 – 2.41 (m, 1H), 2.19 – 2.07 (m, 1H), 1.96 – 1.78 (m, 2H), 1.70 – 1.55 (m, 1H), 1.12 (t,  $J = 7.1$  Hz, 3H).

**$^{13}\text{C NMR}$**  (101 MHz,  $\text{CDCl}_3$ )  $\delta$  170.9, 168.6, 155.8, 151.3, 142.4, 128.0, 127.8, 120.8, 119.8, 117.4, 116.9, 109.9, 107.4, 68.1, 60.4, 50.5, 38.4, 37.3, 22.9, 13.2.

**HRMS (ESI):**  $\text{C}_{22}\text{H}_{24}\text{NO}_6^+$  [(M+H) $^+$ ]: calcd.: 398.1598; found: 398.1599.

**8b-ethyl 8-methyl 3a-((4-fluorophenyl)amino)-7-hydroxy-1,2,3,3a-tetrahydro-8bH-cyclopenta[b]benzofuran-8,8b-dicarboxylate 3af**

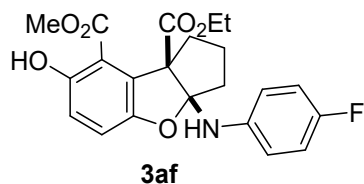

A dark brown oil, 61 mg, 73% yield.

**TLC:**  $R_f = 0.33$  (Hexane/EtOAc = 10:1) [UV, PMA].

**$^1\text{H NMR}$**  (400 MHz,  $\text{CDCl}_3$ )  $\delta$  10.46 (s, 1H), 6.93 – 6.87 (m, 3H), 6.87 – 6.79 (m, 3H), 4.17 – 3.98 (m, 2H), 3.76 (s, 3H), 3.02 – 2.89 (m, 1H), 2.33 – 2.21 (m, 1H), 2.10 – 1.97 (m, 1H), 1.95 – 1.86 (m, 1H), 1.85 – 1.72 (m, 1H), 1.67 – 1.49 (m, 1H), 1.13 (t,  $J = 7.1$  Hz, 3H).

**$^{13}\text{C NMR}$**  (101 MHz,  $\text{CDCl}_3$ )  $\delta$  170.8, 159.2, 156.8, 128.0, 123.1, 123.0, 117.4, 116.8, 114.4, 114.2, 110.4, 107.4, 67.8, 60.4, 50.5, 38.0, 37.3, 22.7, 13.3.

**$^{19}\text{F NMR}$**  (376 MHz,  $\text{CDCl}_3$ )  $\delta$  -121.14.

**HRMS (ESI):**  $\text{C}_{22}\text{H}_{23}\text{FNO}_6^+$  [(M+H) $^+$ ]: calcd.: 416.1504; found: 416.1505.

**8b-ethyl 8-methyl 3a-((4-chlorophenyl)amino)-7-hydroxy-1,2,3,3a-tetrahydro-8bH-cyclopenta[b]benzofuran-8,8b-dicarboxylate 3ag**

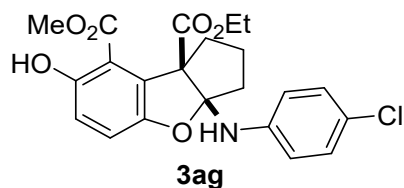

A dark brown oil, 69 mg, 80% yield.

**TLC:**  $R_f = 0.34$  (Hexane/EtOAc = 10:1) [UV, PMA].

**$^1\text{H NMR}$**  (500 MHz,  $\text{CDCl}_3$ )  $\delta$  10.55 (s, 1H), 7.16 (d,  $J = 8.8$  Hz, 2H), 6.97 (d,  $J = 8.9$  Hz, 1H), 6.92 – 6.85 (m, 3H), 4.22 – 4.04 (m, 2H), 3.85 (s, 3H), 3.04 (ddd,  $J = 13.4, 11.1, 6.9$  Hz, 1H), 2.54 – 2.46 (m, 1H), 2.20 – 2.11 (m, 1H), 2.03 – 1.96 (m, 1H), 1.94 – 1.87 (m, 1H), 1.74 – 1.63 (m, 1H), 1.19 (t,  $J = 7.1$  Hz, 3H).

**$^{13}\text{C NMR}$**  (101 MHz,  $\text{CDCl}_3$ )  $\delta$  170.8, 168.5, 155.9, 151.1, 141.0, 127.9, 127.7, 125.8, 120.9, 117.5, 116.8, 109.6, 107.4, 68.0, 60.4, 50.5, 38.5, 37.4, 22.8, 13.2.



HRMS (ESI):  $C_{22}H_{23}ClNO_6^+$  [(M+H)<sup>+</sup>]: calcd.: 432.1208; found: 432.1210.

**8b-ethyl 8-methyl 3a-((2-bromophenyl)amino)-7-hydroxy-1,2,3,3a-tetrahydro-8bH-cyclopenta[b]benzofuran-8,8b-dicarboxylate 3ah**

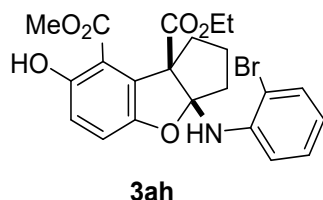

A yellow oil, 77 mg, 81% yield.

TLC:  $R_f = 0.35$  (Hexane/EtOAc = 10:1) [UV, PMA].

<sup>1</sup>H NMR (500 MHz, CDCl<sub>3</sub>)  $\delta$  10.57 (s, 1H), 7.73 (dd,  $J = 7.9, 1.5$  Hz, 1H), 7.30 (dd,  $J = 8.2, 1.6$  Hz, 1H), 7.26 – 7.19 (m, 1H), 6.98 (d,  $J = 8.9$  Hz, 1H), 6.90 (d,  $J = 8.9$  Hz, 1H), 6.66 (dd,  $J = 7.4, 1.6$  Hz, 1H), 5.18 (s, 1H), 4.35 – 4.25 (m, 1H), 4.25 – 4.10 (m, 1H), 3.87 (s, 3H), 3.12 – 3.02 (m, 1H), 2.67 – 2.58 (m, 1H), 2.24 (ddd,  $J = 13.0, 10.5, 6.5$  Hz, 1H), 2.04 – 1.97 (m, 1H), 1.94 (ddt,  $J = 13.3, 6.8, 3.0$  Hz, 1H), 1.72 (m,  $J = 12.6, 10.4, 6.3, 3.9$  Hz, 1H), 1.20 (t,  $J = 7.2$  Hz, 3H).

<sup>13</sup>C NMR (126 MHz, CDCl<sub>3</sub>)  $\delta$  171.7, 169.6, 157.0, 152.2, 144.0, 139.2, 129.0, 128.8, 122.8, 119.7, 118.5, 118.1, 110.6, 108.3, 91.6, 76.8, 69.5, 62.1, 51.6, 39.5, 38.3, 24.0, 14.1.

HRMS (ESI):  $C_{22}H_{23}BrNO_6^+$  [(M+H)<sup>+</sup>]: calcd.: 476.0703; found: 476.0705.

**8b-ethyl 8-methyl 7-hydroxy-3a-((2-iodophenyl)amino)-1,2,3,3a-tetrahydro-8bH-cyclopenta[b]benzofuran-8,8b-dicarboxylate 3ai**

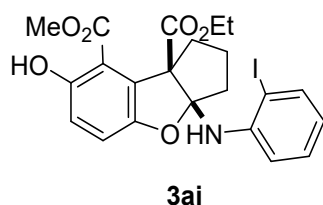

A dark brown oil, 86 mg, 82% yield.

TLC:  $R_f = 0.35$  (Hexane/EtOAc = 10:1) [UV, PMA].

**<sup>1</sup>H NMR** (500 MHz, CDCl<sub>3</sub>) δ 10.57 (s, 1H), 7.73 (dd, *J* = 7.9, 1.5 Hz, 1H), 7.30 (dd, *J* = 8.2, 1.6 Hz, 1H), 7.24 (dd, *J* = 7.1, 1.4 Hz, 1H), 6.98 (d, *J* = 8.9 Hz, 1H), 6.90 (d, *J* = 8.9 Hz, 1H), 5.18 (s, 1H), 4.30 (dd, *J* = 10.9, 7.1 Hz, 1H), 4.16 (dd, *J* = 10.9, 7.1 Hz, 1H), 3.87 (s, 3H), 3.12 – 3.02 (m, 1H), 2.67 – 2.58 (m, 1H), 2.24 (ddd, *J* = 13.0, 10.5, 6.5 Hz, 1H), 2.04 – 1.98 (m, 1H), 1.94 (ddd, *J* = 13.3, 6.6, 3.5 Hz, 1H), 1.79 – 1.66 (m, 1H), 1.20 (t, *J* = 7.2 Hz, 3H).

**<sup>13</sup>C NMR** (126 MHz, CDCl<sub>3</sub>) δ 171.7, 169.6, 157.0, 152.2, 144.0, 139.2, 129.0, 128.8, 122.8, 119.7, 118.5, 118.1, 110.6, 108.3, 91.6, 76.8, 69.5, 62.1, 51.6, 39.5, 38.3, 24.0, 14.1.

**HRMS (ESI):** C<sub>22</sub>H<sub>23</sub>INO<sub>6</sub><sup>+</sup> [(M+H)<sup>+</sup>]: calcd.: 524.0565; found: 524.0569.

**8b-ethyl 8-methyl 3a-((2,6-diethylphenyl)amino)-7-hydroxy-1,2,3,3a-tetrahydro-8bH-cyclopenta[b]benzofuran-8,8b-dicarboxylate 3aj**

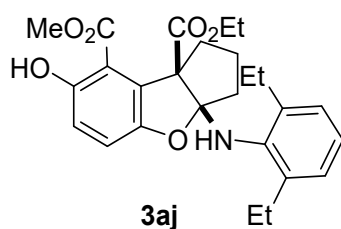

A yellow oil, 79 mg, 87% yield.

**TLC:** *R<sub>f</sub>* = 0.51 (Hexane/EtOAc = 10:1) [UV, PMA].

**<sup>1</sup>H NMR** (500 MHz, CDCl<sub>3</sub>) δ 10.57 (s, 1H), 7.22 – 7.05 (m, 3H), 6.98 (d, *J* = 8.8 Hz, 1H), 6.91 (d, *J* = 8.8 Hz, 1H), 4.28 – 4.15 (m, 2H), 3.87 (s, 3H), 3.08 (td, *J* = 13.0, 6.7 Hz, 1H), 2.93 (dt, *J* = 14.8, 7.4 Hz, 2H), 2.68 (dt, *J* = 14.3, 7.4 Hz, 2H), 2.05 – 1.95 (m, 2H), 1.82 – 1.67 (m, 2H), 1.53 (dd, *J* = 12.5, 6.3 Hz, 1H), 1.22 (t, *J* = 7.1 Hz, 3H), 1.18 (t, *J* = 7.5 Hz, 6H).

**<sup>13</sup>C NMR** (101 MHz, CDCl<sub>3</sub>) δ 171.0, 168.7, 155.7, 151.0, 142.5, 137.2, 128.5, 125.6, 125.4, 117.1, 116.3, 113.3, 107.5, 67.6, 60.2, 50.4, 37.3, 35.8, 23.9, 22.5, 14.6, 13.3.

**HRMS (ESI):** C<sub>26</sub>H<sub>32</sub>NO<sub>6</sub><sup>+</sup> [(M+H)<sup>+</sup>]: calcd.: 454.2224; found: 454.2225.

**8b-ethyl 8-methyl 3a-((4-fluoro-2-methylphenyl)amino)-7-hydroxy-1,2,3,3a-tetrahydro-8bH-cyclopenta[b]benzofuran-8,8b-dicarboxylate 3ak**

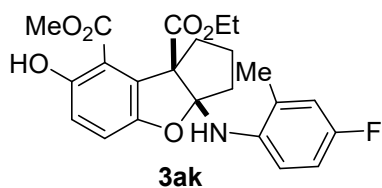

A yellow oil, 68 mg, 79% yield.

**TLC:**  $R_f = 0.51$  (Hexane/EtOAc = 10:1) [UV, PMA].

**$^1\text{H NMR}$**  (400 MHz,  $\text{CDCl}_3$ )  $\delta$  10.46 (s, 1H), 7.26 – 7.19 (m, 1H), 6.88 (d,  $J = 8.9$  Hz, 1H), 6.80 (d,  $J = 8.8$  Hz, 1H), 6.78 – 6.70 (m, 2H), 4.33 – 4.21 (m, 1H), 4.17 (dt,  $J = 10.9, 7.1$  Hz, 1H), 4.04 (dd,  $J = 10.8, 7.1$  Hz, 1H), 3.77 (s, 3H), 2.96 (ddd,  $J = 13.4, 10.9, 6.9$  Hz, 1H), 2.38 – 2.28 (m, 1H), 2.05 (s, 3H), 2.01 – 1.93 (m, 1H), 1.93 – 1.85 (m, 1H), 1.85 – 1.75 (m, 1H), 1.68 – 1.51 (m, 1H), 1.14 (t,  $J = 7.2$  Hz, 3H).

**$^{13}\text{C NMR}$**  (101 MHz,  $\text{CDCl}_3$ )  $\delta$  171.0, 168.6, 159.0, 156.6, 155.8, 151.2, 136.6, 136.5, 132.2, 132.1, 128.0, 122.9, 122.9, 117.4, 116.9, 115.9, 115.6, 111.7, 111.5, 110.6, 107.3, 68.3, 60.5, 50.5, 37.5, 37.2, 23.0, 17.2, 17.2, 13.2.

**HRMS (ESI):**  $\text{C}_{23}\text{H}_{25}\text{FNO}_6^+$  [(M+H) $^+$ ]: calcd.: 430.1660; found: 430.1666.

**8b-ethyl 8-methyl 3a-((4-fluoro-2-iodophenyl)amino)-7-hydroxy-1,2,3,3a-tetrahydro-8bH-cyclopenta[b]benzofuran-8,8b-dicarboxylate 3al**

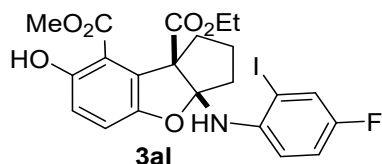

A yellow oil, 86 mg, 79% yield.

**TLC:**  $R_f = 0.50$  (Hexane/EtOAc = 10:1) [UV, PMA].

**$^1\text{H NMR}$**  (500 MHz,  $\text{CDCl}_3$ )  $\delta$  10.56 (s, 1H), 7.47 (dd,  $J = 7.8, 2.9$  Hz, 1H), 7.34 – 7.27 (m, 1H), 6.97 (d,  $J = 8.8$  Hz, 2H), 6.89 (d,  $J = 9.0$  Hz, 1H), 4.93 (s, 1H), 4.32 – 4.13 (m, 2H), 3.86 (s, 3H), 3.11 – 3.02 (m, 1H), 2.53 – 2.44 (m, 1H), 2.20 – 2.11 (m, 1H), 2.04 – 1.96 (m, 1H), 1.92 (dq,  $J = 9.8, 3.3$  Hz, 1H), 1.74 – 1.65 (m, 1H), 1.21 (t,  $J = 7.2$  Hz, 3H).

**$^{13}\text{C NMR}$**  (126 MHz,  $\text{CDCl}_3$ )  $\delta$  171.6, 169.5, 157.0, 152.1, 129.0, 125.7, 125.5, 121.3, 121.3, 118.5, 118.0, 115.6, 115.4, 111.0, 108.3, 69.2, 62.0, 51.6, 39.1, 38.2, 23.9, 14.2.

**HRMS (ESI):** C<sub>22</sub>H<sub>22</sub>FINO<sub>6</sub><sup>+</sup> [(M+H)<sup>+</sup>]: calcd.: 542.0470; found: 542.0472.

**8b-ethyl 8-methyl 7-hydroxy-3a-((2,4,6-trichlorophenyl)amino)-1,2,3,3a-tetrahydro-8bH-cyclopenta[b]benzofuran-8,8b-dicarboxylate 3am**

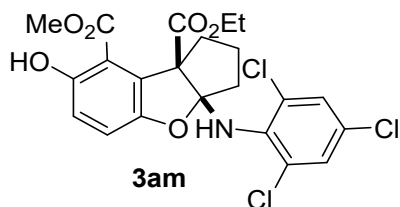

A white solid, 85 mg, 85% yield.

**m.p.:** 100-101 °C.

**TLC:** R<sub>f</sub> = 0.53 (Hexane/EtOAc = 10:1) [UV, PMA].

**<sup>1</sup>H NMR** (500 MHz, CDCl<sub>3</sub>) δ 10.53 (s, 1H), 7.37 (s, 2H), 6.95 (d, *J* = 8.9 Hz, 1H), 6.90 (d, *J* = 8.8 Hz, 1H), 4.60 (s, 1H), 4.23 (dd, *J* = 7.1, 3.1 Hz, 2H), 3.86 (s, 3H), 3.10 (td, *J* = 13.0, 7.1 Hz, 1H), 2.53 (td, *J* = 12.9, 6.2 Hz, 1H), 2.05 – 1.94 (m, 2H), 1.91 – 1.82 (m, 1H), 1.59 (t, *J* = 2.9 Hz, 1H), 1.28 – 1.21 (m, 3H).

**<sup>13</sup>C NMR** (126 MHz, CDCl<sub>3</sub>) δ 171.5, 169.6, 156.9, 152.0, 137.1, 135.2, 131.5, 129.6, 128.7, 118.3, 118.1, 113.3, 108.5, 76.8, 68.4, 61.5, 51.5, 38.1, 36.7, 29.7, 23.7, 14.3.

**HRMS (ESI):** C<sub>22</sub>H<sub>21</sub>Cl<sub>3</sub>NO<sub>6</sub><sup>+</sup> [(M+H)<sup>+</sup>]: calcd.: 500.0429; found: 500.0430.

**8b-ethyl 8-methyl 7-hydroxy-3a-(naphthalen-1-ylamino)-1,2,3,3a-tetrahydro-8bH-cyclopenta[b]benzofuran-8,8b-dicarboxylate 3an**

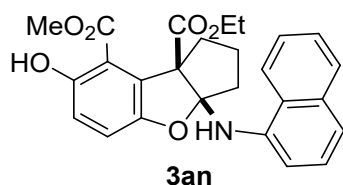

A dark brown oil, 71 mg, 79% yield.

**TLC:** R<sub>f</sub> = 0.45 (Hexane/EtOAc = 10:1) [UV, PMA].

**<sup>1</sup>H NMR** (500 MHz, CDCl<sub>3</sub>) δ 10.58 (s, 1H), 7.97 (dd, *J* = 6.3, 3.4 Hz, 1H), 7.83 (dd, *J* = 6.3, 3.3 Hz, 1H), 7.60 (d, *J* = 8.1 Hz, 1H), 7.55 (d, *J* = 7.3 Hz, 1H), 7.48 (dt, *J* = 6.4, 3.4 Hz, 2H), 7.43 (t, *J* = 7.8 Hz, 1H), 7.02 (d, *J* = 8.8 Hz, 1H), 6.92 (d, *J* = 8.8 Hz, 1H), 5.02 (s, 1H), 4.44 –

4.34 (m, 1H), 4.33 – 4.23 (m, 1H), 3.91 (s, 3H), 3.12 (ddd,  $J = 13.2, 10.6, 6.8$  Hz, 1H), 2.58 – 2.45 (m, 1H), 2.19 (ddd,  $J = 13.1, 10.9, 6.5$  Hz, 1H), 2.08 – 1.99 (m, 1H), 1.91 (dq,  $J = 9.8, 3.5$  Hz, 1H), 1.78 – 1.65 (m, 1H), 1.29 (t,  $J = 7.1$  Hz, 3H).

$^{13}\text{C}$  NMR (101 MHz,  $\text{CDCl}_3$ )  $\delta$  171.2, 168.6, 155.8, 151.3, 137.8, 133.3, 128.6, 128.1, 127.3, 124.8, 124.7, 122.6, 121.1, 118.1, 117.4, 117.0, 110.6, 107.4, 68.5, 60.7, 50.5, 37.3, 37.2, 23.1, 13.3.

HRMS (ESI):  $\text{C}_{26}\text{H}_{26}\text{NO}_6^+$  [(M+H) $^+$ ]: calcd.: 448.1755; found: 448.1756.

**9a-ethyl 1-methyl 2-hydroxy-5a-(phenylamino)-6,7,8,9-tetrahydrodibenzo[*b,d*]furan-1,9a(5a*H*)-dicarboxylate 3ao**

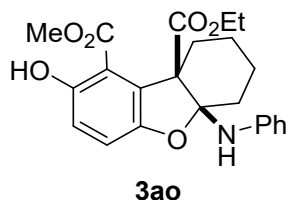

A yellow oil, 73 mg, 89% yield.

TLC:  $R_f = 0.60$  (Hexane/EtOAc = 10:1) [UV, PMA].

$^1\text{H}$  NMR (500 MHz,  $\text{CDCl}_3$ )  $\delta$  10.30 (s, 1H), 7.21 (d,  $J = 7.8$  Hz, 2H), 7.04 (s, 1H), 7.03 – 6.95 (m, 3H), 6.90 (d,  $J = 9.0$  Hz, 1H), 4.33 – 4.18 (m, 2H), 3.88 (s, 3H), 2.78 (dd,  $J = 14.5, 4.1$  Hz, 1H), 2.70 (dd,  $J = 14.5, 4.1$  Hz, 1H), 2.68 (dd,  $J = 14.7, 3.8$  Hz, 2H), 1.80 – 1.71 (m, 1H), 1.61 – 1.48 (m, 2H), 1.46 – 1.36 (m, 1H), 1.29 (t,  $J = 7.2$  Hz, 3H).

$^{13}\text{C}$  NMR (126 MHz,  $\text{CDCl}_3$ )  $\delta$  172.0, 169.7, 156.1, 149.8, 142.2, 132.9, 128.6, 123.8, 122.9, 119.2, 117.8, 109.7, 100.3, 61.2, 60.5, 51.6, 33.9, 29.9, 20.8, 20.4, 14.2.

HRMS (ESI):  $\text{C}_{23}\text{H}_{26}\text{NO}_6^+$  [(M+H) $^+$ ]: calcd.: 412.1755; found: 412.1757.

**10a-ethyl 1-methyl 2-hydroxy-5a-(phenylamino)-5a,6,7,8,9,10-hexahydro-10a*H*-cyclohepta[*b*]benzofuran-1,10a-dicarboxylate 3ap**

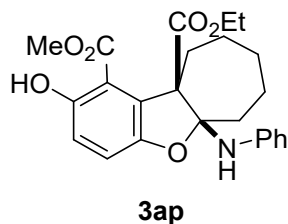

A yellow oil, 73 mg, 86% yield.

**TLC:**  $R_f = 0.60$  (Hexane/EtOAc = 10:1) [UV, PMA].

**$^1\text{H NMR}$**  (500 MHz,  $\text{CDCl}_3$ )  $\delta$  10.65 (d,  $J = 1.3$  Hz, 1H), 7.26 – 7.16 (m, 2H), 7.05 (dd,  $J = 8.8, 1.3$  Hz, 1H), 7.00 – 6.87 (m, 4H), 3.87 (d,  $J = 1.3$  Hz, 3H), 3.77 (d,  $J = 1.3$  Hz, 3H), 2.67 (dd,  $J = 15.6, 6.3$  Hz, 1H), 2.53 (dd,  $J = 15.3, 10.8$  Hz, 1H), 2.44 – 2.33 (m, 1H), 2.14 – 2.00 (m, 1H), 1.92 (m,  $J = 13.0, 4.5$  Hz, 1H), 1.81 – 1.69 (m, 2H), 1.51 (ddd,  $J = 13.8, 9.3, 4.4$  Hz, 1H), 1.41 (ddd,  $J = 13.1, 10.3, 5.7$  Hz, 1H), 0.90 (dd,  $J = 14.5, 11.0$  Hz, 1H).

**$^{13}\text{C NMR}$**  (126 MHz,  $\text{CDCl}_3$ )  $\delta$  172.7, 169.8, 157.3, 150.7, 142.8, 128.6, 128.3, 122.2, 121.8, 119.1, 118.8, 109.3, 102.7, 67.0, 52.2, 51.7, 34.5, 30.8, 30.5, 23.3, 22.7.

**HRMS (ESI):**  $\text{C}_{24}\text{H}_{28}\text{NO}_6^+$  [(M+H) $^+$ ]: calcd.: 426.1911; found: 426.1919.

**8b-ethyl 8-methyl 3a-(benzylamino)-7-hydroxy-1,2,3,3a-tetrahydro-8bH-cyclopenta[*b*]benzofuran-8,8b-dicarboxylate 3aq**

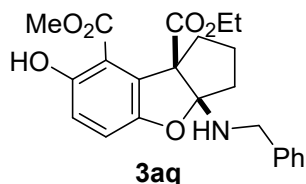

A yellow oil, 63 mg, 77% yield.

**TLC:**  $R_f = 0.57$  (Hexane/EtOAc = 10:1) [UV, PMA].

**$^1\text{H NMR}$**  (500 MHz,  $\text{CDCl}_3$ )  $\delta$  10.53 (s, 1H), 7.35 – 7.29 (m, 3H), 7.28 (d,  $J = 2.1$  Hz, 1H), 7.24 (d,  $J = 6.7$  Hz, 1H), 6.96 (d,  $J = 8.8$  Hz, 1H), 6.87 (d,  $J = 8.9$  Hz, 1H), 4.14 – 4.05 (m, 3H), 3.99 (d,  $J = 13.2$  Hz, 1H), 3.83 (s, 3H), 3.05 (td,  $J = 13.0, 6.9$  Hz, 1H), 2.42 – 2.34 (m, 1H), 2.07 – 1.94 (m, 2H), 1.92 – 1.83 (m, 1H), 1.71 – 1.57 (m, 1H), 1.07 (t,  $J = 7.1$  Hz, 3H).

**$^{13}\text{C NMR}$**  (126 MHz,  $\text{CDCl}_3$ )  $\delta$  171.8, 169.7, 156.6, 152.4, 140.2, 129.4, 128.3, 127.7, 127.0, 118.1, 117.5, 113.5, 108.5, 68.0, 61.1, 51.4, 47.4, 38.4, 37.9, 29.7, 23.6, 14.2.

**HRMS (ESI):**  $\text{C}_{23}\text{H}_{26}\text{NO}_6^+$  [(M+H) $^+$ ]: calcd.: 412.1755; found: 412.1760.

**8b-ethyl 8-methyl 7-hydroxy-3a-((4-methylphenethyl)amino)-1,2,3,3a-tetrahydro-8bH-cyclopenta[b]benzofuran-8,8b-dicarboxylate 3ar**

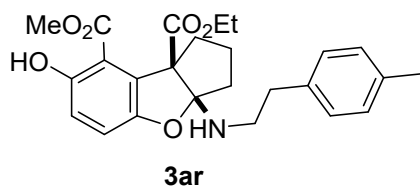

A white solid, 78 mg, 89% yield.

**m.p.:** 90-92 °C.

**TLC:**  $R_f = 0.58$  (Hexane/EtOAc = 10:1) [UV, PMA].

**$^1\text{H NMR}$**  (500 MHz,  $\text{CDCl}_3$ )  $\delta$  10.53 (s, 1H), 7.08 (s, 4H), 6.91 (s, 1H), 6.86 (s, 1H), 4.14 – 3.97 (m, 2H), 3.81 (s, 3H), 3.26 – 3.18 (m, 1H), 3.04 – 2.93 (m, 2H), 2.83 – 2.74 (m, 1H), 2.73 – 2.63 (m, 1H), 2.39 – 2.32 (m, 1H), 2.31 (s, 3H), 2.00 – 1.90 (m, 2H), 1.88 – 1.79 (m, 1H), 1.64 – 1.51 (m, 1H), 1.10 (t,  $J = 7.1$  Hz, 3H).

**$^{13}\text{C NMR}$**  (126 MHz,  $\text{CDCl}_3$ )  $\delta$  171.8, 169.7, 156.5, 152.4, 136.4, 135.7, 129.3, 129.1, 128.6, 118.0, 117.5, 113.6, 108.4, 67.9, 61.1, 51.4, 44.6, 38.3, 38.0, 36.4, 23.5, 21.0, 14.2.

**HRMS (ESI):**  $\text{C}_{25}\text{H}_{30}\text{NO}_6^+$  [(M+H) $^+$ ]: calcd.:440.2068; found: 440.2070.

**8b-ethyl 8-methyl 3a-(ethylamino)-7-hydroxy-1,2,3,3a-tetrahydro-8bH-cyclopenta[b]benzofuran-8,8b-dicarboxylate 3as**

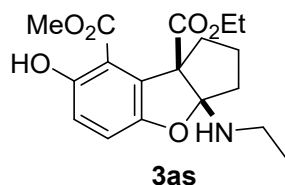

A dark brown oil, 57 mg, 81% yield.

**TLC:**  $R_f = 0.55$  (Hexane/EtOAc = 10:1) [UV, PMA].

**$^1\text{H NMR}$**  (400 MHz,  $\text{CDCl}_3$ )  $\delta$  10.44 (s, 1H), 6.83 (d,  $J = 8.9$  Hz, 1H), 6.80 – 6.72 (m, 1H), 4.18 – 3.95 (m, 2H), 3.73 (s, 3H), 2.90 (ddd,  $J = 14.4, 12.9, 7.1$  Hz, 2H), 2.65 (dd,  $J = 11.0, 7.2$  Hz, 1H), 2.31 – 2.19 (m, 1H), 1.94 – 1.79 (m, 2H), 1.78 – 1.68 (m, 1H), 1.50 (dd,  $J = 12.7, 6.3$  Hz, 1H), 1.11 (t, 3H), 0.98 (t,  $J = 7.1$  Hz, 3H).

**$^{13}\text{C NMR}$**  (101 MHz,  $\text{CDCl}_3$ )  $\delta$  170.9, 168.7, 155.5, 151.4, 128.3, 117.0, 116.4, 112.7, 107.4,

76.3, 66.8, 60.0, 50.4, 37.3, 36.8, 36.7, 22.5, 14.6, 13.3.

**HRMS (ESI):** C<sub>18</sub>H<sub>24</sub>NO<sub>6</sub><sup>+</sup> [(M+H)<sup>+</sup>]: calcd.: 350.1598; found: 350.1590.

**8b-ethyl 8-methyl 3a-(butylamino)-7-hydroxy-1,2,3,3a-tetrahydro-8bH-cyclopenta[b]benzofuran-8,8b-dicarboxylate 3at**

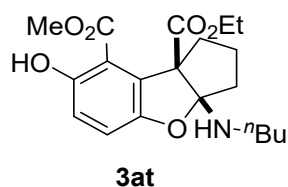

A yellow oil, 60 mg, 79% yield.

**TLC:** R<sub>f</sub> = 0.55 (Hexane/EtOAc = 10:1) [UV, PMA].

**<sup>1</sup>H NMR** (400 MHz, CDCl<sub>3</sub>) δ 10.44 (s, 1H), 6.84 (d, *J* = 8.8 Hz, 1H), 6.76 (d, *J* = 8.8 Hz, 1H), 4.15 – 3.96 (m, 2H), 3.73 (s, 3H), 2.95 – 2.80 (m, 2H), 2.60 (dd, *J* = 11.1, 7.5 Hz, 1H), 2.27 – 2.17 (m, 1H), 1.89 – 1.80 (m, 2H), 1.79 – 1.69 (m, 1H), 1.55 – 1.45 (m, 1H), 1.38 – 1.21 (m, 4H), 1.11 (t, *J* = 7.1 Hz, 3H), 0.81 (t, *J* = 7.1 Hz, 3H).

**<sup>13</sup>C NMR** (101 MHz, CDCl<sub>3</sub>) δ 170.9, 168.7, 155.5, 151.4, 128.3, 117.0, 116.5, 112.8, 107.4, 66.9, 60.0, 50.4, 41.9, 37.2, 36.8, 31.6, 28.7, 22.5, 19.3, 13.3, 12.9.

**HRMS (ESI):** C<sub>20</sub>H<sub>28</sub>NO<sub>6</sub><sup>+</sup> [(M+H)<sup>+</sup>]: calcd.: 378.1911; found: 378.1919.

**8b-ethyl 8-methyl 3a-(sec-butylamino)-7-hydroxy-1,2,3,3a-tetrahydro-8bH-cyclopenta[b]benzofuran-8,8b-dicarboxylate 3au (dr 1.3:1)**

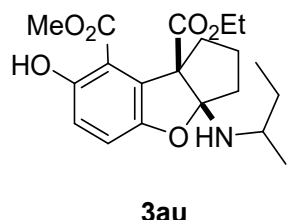

A yellow oil, 61 mg, 81% yield.

**TLC:** R<sub>f</sub> = 0.55 (Hexane/EtOAc = 10:1) [UV, PMA].

**<sup>1</sup>H NMR** (400 MHz, CDCl<sub>3</sub>) δ 10.48 (s, 0.39H), δ 10.47 (s, 0.52H), 6.91– 6.82 (m, 2H), 4.17– 4.09 (m, 2H), 3.80 (s, 3H), 3.01 – 2.94 (m, 2H), 2.33 – 2.28 (m, 1H), 1.99 – 1.81 (m, 3H), 1.66– 1.54 (m, 2H), 1.41 – 1.23 (m, 2H), 1.22 – 1.18 (m, 3H), 1.14 (d, *J* = 6.3 Hz, 1.32H), 1.00 (d, *J*



= 6.5 Hz, 1.60H), 0.88– 0.82 (m, 3H).

$^{13}\text{C}$  NMR (101 MHz,  $\text{CDCl}_3$ )  $\delta$  170.9, 170.9, 168.7, 168.7, 155.2, 155.2, 151.4, 151.3, 128.6, 128.5, 116.8, 116.8, 116.4, 116.4, 113.3, 113.0, 107.5, 107.4, 67.4, 67.3, 59.9, 59.8, 50.3, 49.9, 49.1, 37.1, 37.0, 36.6, 36.6, 30.8, 30.0, 22.7, 22.7, 22.4, 21.0, 13.3, 13.2, 9.68, 8.73.

**HRMS (ESI):**  $\text{C}_{20}\text{H}_{28}\text{NO}_6^+$  [(M+H) $^+$ ]: calcd.:378.1911; found: 378.1918.

Compound **3au** was synthesized using racemic ethyl 2-(*sec*-butylamino)cyclopentane-1-carboxylate following the *general procedure*. The *dr* was 1.3:1, which was determined from  $^1\text{H}$  NMR analysis of product. The two diastereoisomers were not separated by column chromatography.

**8b-ethyl 8-methyl 3a-((2-((*tert*-butyldimethylsilyl)oxy)ethyl)amino)-7-hydroxy-1,2,3,3a-tetrahydro-8bH-cyclopenta[b]benzofuran-8,8b-dicarboxylate 3av**

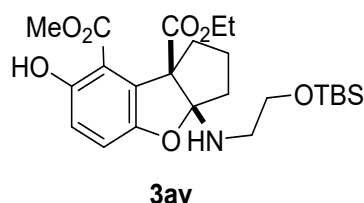

A dark brown oil, 77 mg, 80% yield.

**TLC:**  $R_f$  = 0.56 (Hexane/EtOAc = 10:1) [UV, PMA].

$^1\text{H}$  NMR (500 MHz,  $\text{CDCl}_3$ )  $\delta$  10.53 (s, 1H), 6.90 (d,  $J$  = 8.9 Hz, 1H), 6.83 (d,  $J$  = 8.8 Hz, 1H), 3.81 (s, 3H), 3.74 – 3.66 (m, 2H), 3.64 (s, 3H), 3.10 – 2.94 (m, 2H), 2.77 (dt,  $J$  = 12.0, 4.3 Hz, 1H), 2.32 – 2.24 (m, 1H), 1.98 – 1.88 (m, 2H), 1.88 – 1.78 (m, 1H), 1.64 – 1.50 (m, 1H), 0.82 (s, 9H), 0.02 (s, 3H), 0.01 (s, 3H).

$^{13}\text{C}$  NMR (101 MHz,  $\text{CDCl}_3$ )  $\delta$  171.5, 168.7, 155.5, 151.5, 128.1, 117.0, 116.5, 112.5, 107.3, 67.0, 61.6, 51.2, 50.4, 44.4, 37.4, 37.1, 24.8, 22.5, 17.1, -6.3, -6.4.

**HRMS (ESI):**  $\text{C}_{24}\text{H}_{38}\text{NO}_7\text{Si}^+$  [(M+H) $^+$ ]: calcd.:480.2412; found: 480.2414.

**8b-ethyl 8-methyl 3a-(cyclohexylamino)-7-hydroxy-1,2,3,3a-tetrahydro-8bH-cyclopenta[b]benzofuran-8,8b-dicarboxylate 3aw**

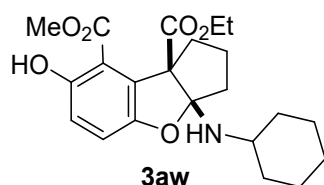

A yellow oil, 65 mg, 81% yield.

**TLC:**  $R_f = 0.65$  (Hexane/EtOAc = 10:1) [UV, PMA].

**$^1\text{H NMR}$**  (500 MHz,  $\text{CDCl}_3$ )  $\delta$  10.49 (s, 1H), 6.90 (d,  $J = 8.8$  Hz, 1H), 6.84 (d,  $J = 8.8$  Hz, 1H), 4.24 – 4.04 (m, 2H), 3.81 (s, 3H), 3.05 – 2.91 (m, 1H), 2.87 – 2.77 (m, 1H), 2.32 (ddt,  $J = 12.7$ , 6.0, 1.8 Hz, 1H), 2.10 – 2.04 (m, 1H), 1.99 (td,  $J = 12.8$ , 6.3 Hz, 1H), 1.90 (ddt,  $J = 13.4$ , 6.9, 1.7 Hz, 1H), 1.86 – 1.79 (m, 2H), 1.72 – 1.64 (m, 3H), 1.62 – 1.52 (m, 2H), 1.33 – 1.25 (m, 1H), 1.21 (t,  $J = 7.1$  Hz, 3H), 1.16 – 0.98 (m, 3H).

**$^{13}\text{C NMR}$**  (126 MHz,  $\text{CDCl}_3$ )  $\delta$  172.0, 169.8, 156.3, 152.4, 129.5, 117.9, 117.5, 114.0, 108.5, 68.4, 61.0, 52.5, 51.3, 38.1, 37.7, 36.1, 35.5, 25.8, 25.3, 25.2, 23.7, 14.4.

**HRMS (ESI):**  $\text{C}_{19}\text{H}_{22}\text{NO}_6^+$  [(M+H) $^+$ ]: calcd.:404.2068; found: 404.2070.

**8b-ethyl 8-methyl 3a-(cyclopropylamino)-7-hydroxy-1,2,3,3a-tetrahydro-8bH-cyclopenta[b]benzofuran-8,8b-dicarboxylate 3ax**

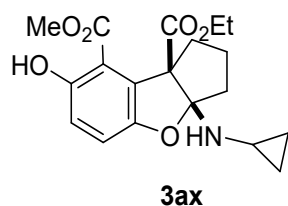

A brown oil, 64 mg, 89% yield.

**TLC:**  $R_f = 0.65$  (Hexane/EtOAc = 10:1) [UV, PMA].

**$^1\text{H NMR}$**  (500 MHz,  $\text{CDCl}_3$ )  $\delta$  10.51 (s, 1H), 6.94 (d,  $J = 8.8$  Hz, 1H), 6.85 (d,  $J = 8.8$  Hz, 1H), 4.19 – 4.02 (m, 2H), 3.80 (s, 3H), 2.95 (td,  $J = 13.0$ , 6.9 Hz, 1H), 2.50 – 2.39 (m, 2H), 2.14 – 2.04 (m, 1H), 1.94 – 1.88 (m, 1H), 1.86 – 1.77 (m, 1H), 1.66 – 1.53 (m, 1H), 1.16 (t,  $J = 7.1$  Hz, 3H), 0.56 – 0.50 (m, 1H), 0.47 (dd,  $J = 7.1$ , 4.2 Hz, 1H), 0.41 (dd,  $J = 9.6$ , 5.9 Hz, 1H), 0.33 – 0.25 (m, 1H).

**$^{13}\text{C NMR}$**  (126 MHz,  $\text{CDCl}_3$ )  $\delta$  171.7, 169.7, 156.5, 152.3, 129.5, 118.0, 117.5, 114.3, 108.5,

77.3, 51.3, 38.2, 37.6, 25.2, 23.6, 14.2, 8.5, 4.7.

**HRMS (ESI):** C<sub>19</sub>H<sub>23</sub>NO<sub>6</sub><sup>+</sup> [(M+H)<sup>+</sup>]: calcd.: 362.1598; found: 362.1590.

**8b-ethyl 8-methyl 7-hydroxy-3a-(prop-2-yn-1-ylamino)-1,2,3,3a-tetrahydro-8bH-cyclopenta[b]benzofuran-8,8b-dicarboxylate 3ay**

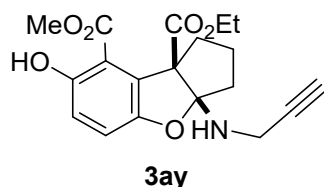

A yellow oil, 56 mg, 78% yield.

**TLC:**  $R_f = 0.56$  (Hexane/EtOAc = 10:1) [UV, PMA].

**<sup>1</sup>H NMR** <sup>1</sup>H NMR (500 MHz, CDCl<sub>3</sub>)  $\delta$  6.95 (s, 1H), 6.86 (d,  $J = 8.8$  Hz, 1H), 4.26 – 4.09 (m, 2H), 3.82 (s, 3H), 3.68 (dd,  $J = 16.2, 2.5$  Hz, 1H), 3.53 (dd,  $J = 16.2, 2.5$  Hz, 1H), 3.07 – 2.94 (m, 1H), 2.33 – 2.24 (m, 1H), 2.18 (s, 1H), 2.02 – 1.92 (m, 2H), 1.90 – 1.82 (m, 1H), 1.68 – 1.56 (m, 1H), 1.21 (t,  $J = 7.1$  Hz, 3H).

**<sup>13</sup>C NMR** (126 MHz, CDCl<sub>3</sub>)  $\delta$  171.5, 169.6, 169.5, 156.7, 156.5, 152.2, 152.2, 129.3, 129.2, 118.2, 118.1, 117.5, 117.5, 112.6, 108.4, 108.4, 81.8, 76.8, 71.0, 68.0, 61.3, 51.4, 38.3, 37.6, 32.8, 23.4, 14.2.

**HRMS (ESI):** C<sub>19</sub>H<sub>22</sub>NO<sub>6</sub><sup>+</sup> [(M+H)<sup>+</sup>]: calcd.: 360.1442; found: 360.1448.

**8b-ethyl 8-methyl 3a-(allylamino)-7-hydroxy-1,2,3,3a-tetrahydro-8bH-cyclopenta[b]benzofuran-8,8b-dicarboxylate 3az**

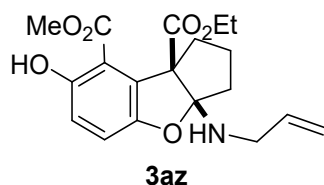

A colorless oil, 55 mg, 76% yield.

**TLC:**  $R_f = 0.54$  (Hexane/EtOAc = 10:1) [UV, PMA].

**<sup>1</sup>H NMR** (400 MHz, CDCl<sub>3</sub>)  $\delta$  10.52 (s, 1H), 6.93 (d,  $J = 8.8$  Hz, 1H), 6.85 (d,  $J = 8.8$  Hz, 1H), 5.96 – 5.82 (m, 1H), 5.15 (dq,  $J = 17.1, 1.7$  Hz, 1H), 5.04 (dq,  $J = 10.3, 1.5$  Hz, 1H), 4.14 (q,  $J$

= 7.2 Hz, 2H), 3.82 (s, 3H), 3.58 – 3.47 (m, 1H), 3.44 – 3.34 (m, 1H), 3.00 (td,  $J = 13.1, 6.8$  Hz, 1H), 2.36 – 2.26 (m, 1H), 2.01 – 1.92 (m, 2H), 1.89 – 1.77 (m, 1H), 1.70 – 1.46 (m, 3H), 1.19 (t,  $J = 7.1$  Hz, 3H).

$^{13}\text{C}$  NMR (101 MHz,  $\text{CDCl}_3$ )  $\delta$  170.8, 168.7, 155.5, 151.4, 135.7, 128.3, 117.0, 116.5, 114.4, 112.4, 107.4, 75.7, 67.0, 60.1, 57.5, 50.4, 45.0, 37.3, 36.9, 22.5, 17.4, 13.3.

HRMS (ESI):  $\text{C}_{19}\text{H}_{24}\text{NO}_6^+$  [(M+H) $^+$ ]: calcd.: 362.1598; found: 362.1598

**Dimethyl 7-hydroxy-3a-(*p*-tolylamino)-1,2,3,3a-tetrahydro-8bH-cyclopenta[*b*]benzofuran-8,8b-dicarboxylate 3aa'**

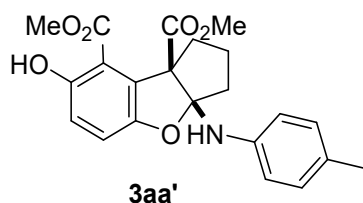

A yellow oil, 71 mg, 89% yield.

TLC:  $R_f = 0.55$  (Hexane/EtOAc = 10:1) [UV, PMA].

$^1\text{H}$  NMR (400 MHz,  $\text{CDCl}_3$ )  $\delta$  10.47 (s, 1H), 6.96 (d,  $J = 8.1$  Hz, 2H), 6.89 (d,  $J = 8.9$  Hz, 1H), 6.87 – 6.83 (m, 2H), 6.81 (d,  $J = 8.8$  Hz, 1H), 3.77 (s, 3H), 3.59 (s, 3H), 2.96 (ddd,  $J = 13.4, 11.4, 6.9$  Hz, 1H), 2.42 – 2.30 (m, 1H), 2.20 (s, 3H), 2.15 – 2.05 (m, 1H), 1.93 – 1.86 (m, 1H), 1.85 – 1.77 (m, 1H), 1.64 – 1.52 (m, 1H).

$^{13}\text{C}$  NMR (101 MHz,  $\text{CDCl}_3$ )  $\delta$  171.4, 168.6, 155.8, 151.2, 139.7, 131.1, 128.3, 127.9, 121.4, 117.4, 116.9, 110.6, 107.3, 68.0, 51.4, 50.5, 38.1, 37.4, 22.8, 19.7.

HRMS (ESI):  $\text{C}_{22}\text{H}_{24}\text{NO}_6^+$  [(M+H) $^+$ ]: calcd.: 398.1598; found: 398.1599.

**diethyl 7-hydroxy-3a-(*p*-tolylamino)-1,2,3,3a-tetrahydro-8bH-cyclopenta[*b*]benzofuran-8,8b-dicarboxylate 3ba**

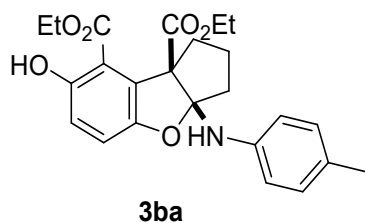

A dark brown oil, 69 mg, 81% yield.

**TLC:**  $R_f = 0.55$  (Hexane/EtOAc = 10:1) [UV, PMA].

**$^1\text{H NMR}$**  (500 MHz,  $\text{CDCl}_3$ )  $\delta$  10.69 (s, 1H), 7.04 (d,  $J = 8.1$  Hz, 2H), 6.97 (d,  $J = 8.8$  Hz, 1H), 6.93 – 6.87 (m, 3H), 4.60 – 4.45 (m, 1H), 4.27 – 4.06 (m, 3H), 3.11 – 2.98 (m, 1H), 2.55 – 2.40 (m, 1H), 2.29 (s, 3H), 2.17 (td,  $J = 12.2, 6.5$  Hz, 1H), 2.10 – 2.01 (m, 1H), 1.94 – 1.86 (m, 1H), 1.74 – 1.63 (m, 1H), 1.39 (t,  $J = 7.2$  Hz, 3H), 1.20 (t,  $J = 7.1$  Hz, 3H).

**$^{13}\text{C NMR}$**  (126 MHz,  $\text{CDCl}_3$ )  $\delta$  172.0, 169.5, 156.8, 152.2, 140.8, 131.9, 129.3, 129.0, 122.0, 118.3, 117.7, 111.6, 108.9, 68.8, 61.6, 61.3, 39.0, 38.6, 23.9, 20.7, 14.2, 14.0.

**HRMS (ESI):**  $\text{C}_{24}\text{H}_{28}\text{NO}_6^+$  [(M+H) $^+$ ]: calcd.: 426.1911; found: 426.1915.

**ethyl(3aS,8bR)-8-chloro-7-hydroxy-3a-(p-tolylamino)-1,2,3,3a-tetrahydro-8bH-cyclopenta[b]benzofuran-8b-carboxylate 3ca**

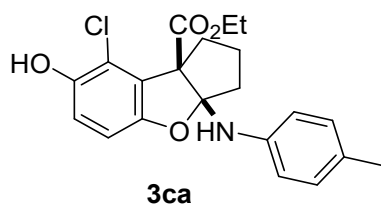

Trace amount of product confirmed by HRMS.

**HRMS (ESI):**  $\text{C}_{21}\text{H}_{23}\text{ClNO}_4^+$  [(M+H) $^+$ ]: calcd.: 388.1310; found: 388.1310.

**9b-ethyl 9-methyl 8-hydroxy-4b-(p-tolylamino)-4b,10-dihydro-9bH-indeno[1,2-b]benzofuran-9,9b-dicarboxylate 3da**

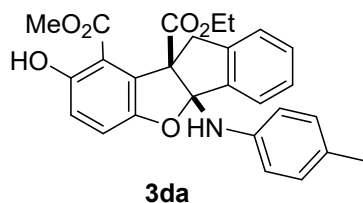

A brown oil, 82 mg, 89% yield.

**TLC:**  $R_f = 0.55$  (Hexane/EtOAc = 10:1) [UV, PMA].

**$^1\text{H NMR}$**  (400 MHz,  $\text{CDCl}_3$ )  $\delta$  10.53 (s, 1H), 7.38 (d,  $J = 7.7$  Hz, 1H), 7.28 (d,  $J = 7.4$  Hz, 1H), 7.24 – 7.14 (m, 2H), 6.95 (d,  $J = 9.0$  Hz, 1H), 6.79 (dd,  $J = 16.7, 8.4$  Hz, 3H), 6.46 (d,  $J = 7.9$  Hz, 2H), 4.44 (s, 1H), 4.35 (d,  $J = 17.4$  Hz, 1H), 3.82 (s, 3H), 3.75 (d,  $J = 7.9$  Hz, 1H), 3.45 – 3.32 (m, 1H), 3.24 (d,  $J = 17.4$  Hz, 1H), 2.11 (s, 3H), 0.85 (t,  $J = 7.2$  Hz, 3H).

**$^{13}\text{C NMR}$**  (101 MHz,  $\text{CDCl}_3$ )  $\delta$  170.2, 168.4, 156.5, 149.5, 145.3, 142.6, 139.2, 138.8, 132.9, 130.0, 128.8, 128.7, 128.4, 128.4, 128.1, 127.0, 126.2, 125.4, 123.6, 118.0, 117.5, 117.4, 110.4, 107.4, 75.7, 66.6, 61.7, 60.4, 58.2, 50.8, 43.1, 19.5, 13.1, 12.8.

**HRMS (ESI):**  $\text{C}_{27}\text{H}_{26}\text{NO}_6^+$  [(M+H) $^+$ ]: calcd.: 460.1755; found: 460.1760

**9b-ethyl 9-methyl 8-hydroxy-3-methyl-4b-(p-tolylamino)-4b,10-dihydro-9bH-indeno-[1,2-b]benzofuran-9,9b-dicarboxylate 3ea**

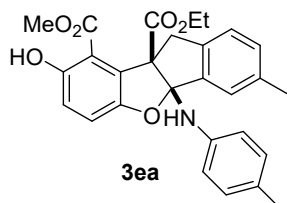

A brown oil, 81 mg, 86% yield.

**$^1\text{H NMR}$**  (400 MHz,  $\text{CDCl}_3$ )  $\delta$  10.62 (s, 1H), 7.29 (s, 1H), 7.19 (d,  $J = 1.7$  Hz, 1H), 7.13 (d,  $J = 7.8$  Hz, 1H), 7.03 (d,  $J = 8.9$  Hz, 1H), 6.89 (d,  $J = 8.9$  Hz, 1H), 6.85 (d,  $J = 8.3$  Hz, 2H), 6.54 (d, 2H), 4.52 (s, 1H), 4.37 (d,  $J = 17.2$  Hz, 1H), 3.89 (s, 3H), 3.84 – 3.72 (m, 1H), 3.47 – 3.34 (m, 1H), 3.27 (d,  $J = 17.2$  Hz, 1H), 2.34 (s, 3H), 2.19 (s, 3H), 0.91 (t,  $J = 7.2$  Hz, 3H).

**$^{13}\text{C NMR}$**  (101 MHz,  $\text{CDCl}_3$ )  $\delta$  170.6, 168.6, 156.3, 149.5, 140.2, 139.6, 137.3, 136.6, 130.7, 129.0, 123.7, 123.6, 117.6, 117.3, 116.5, 111.0, 107.4, 66.4, 60.2, 50.7, 43.6, 20.2, 19.4, 12.7.

**HRMS (ESI):**  $\text{C}_{27}\text{H}_{26}\text{NO}_6^+$  [(M+H) $^+$ ]: calcd.: 474.1911; found: 474.1920.

**9b-ethyl 9-methyl 2-bromo-8-hydroxy-4b-(p-tolylamino)-4b,10-dihydro-9bH-indeno[1,2-b]benzofuran-9,9b-dicarboxylate 3fa**

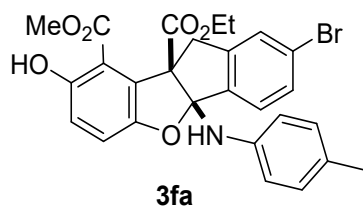

A dark brown oil, 90 mg, 84% yield.

**TLC:**  $R_f = 0.55$  (Hexane/EtOAc = 10:1) [UV, PMA].

**$^1\text{H NMR}$**  (400 MHz,  $\text{CDCl}_3$ )  $\delta$  10.50 (s, 1H), 7.31 (d, 2H), 7.18 (d, 1H), 6.94 (d,  $J = 8.9$  Hz, 1H), 6.80 (dd,  $J = 12.7, 8.5$  Hz, 3H), 6.51 – 6.42 (m, 2H), 4.39 – 4.29 (m, 2H), 3.81 (s, 3H), 3.82 – 3.69 (m, 1H), 3.50 – 3.37 (m, 1H), 3.20 (d,  $J = 17.6$  Hz, 1H), 2.12 (s, 3H), 0.86 (t,  $J = 7.1$  Hz, 3H).

**$^{13}\text{C NMR}$**  (101 MHz,  $\text{CDCl}_3$ )  $\delta$  171.1, 169.3, 157.5, 150.5, 143.6, 140.2, 139.8, 130.9, 129.8, 129.3, 129.1, 128.0, 126.4, 124.5, 118.9, 118.6, 118.3, 111.4, 108.4, 67.6, 61.4, 51.6, 44.0, 29.6, 20.4, 13.7.

**HRMS (ESI):**  $\text{C}_{27}\text{H}_{24}\text{BrNO}_6^+$  [(M+H) $^+$ ]: calcd.: 538.0860; found: 538.0866

## 6. X-ray Crystallographic Analysis of 3aa

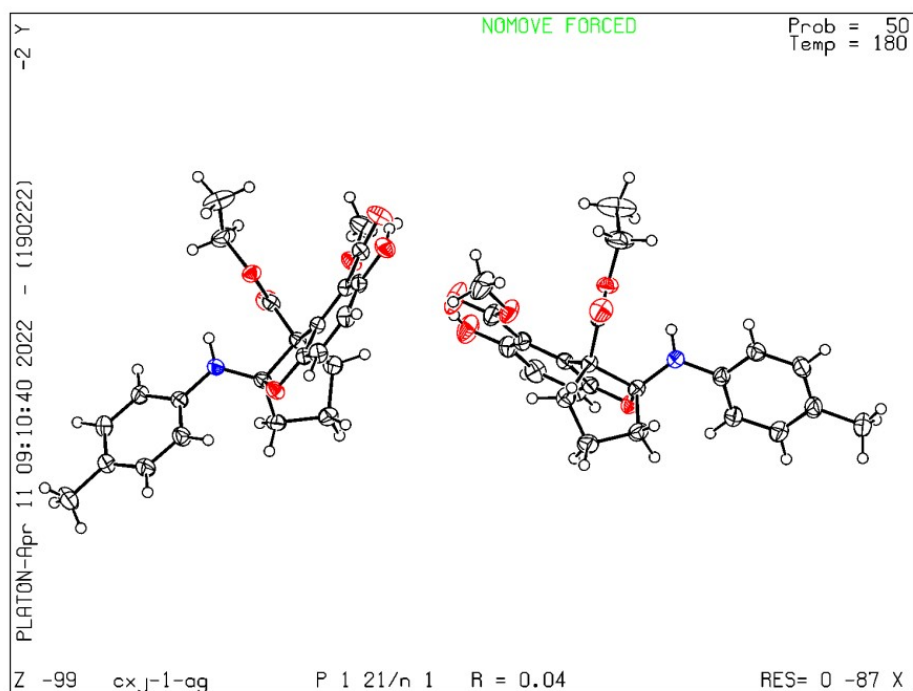

| Bond precision         | C-C = 0.0019 Å                                                         | Wavelength=1.54184                                              |                            |
|------------------------|------------------------------------------------------------------------|-----------------------------------------------------------------|----------------------------|
| Cell                   | a=20.52336(13)<br>alpha=90                                             | b=8.40993(5)<br>beta=98.5520(6)                                 | c=25.93692(17)<br>gamma=90 |
| Temperature            | 180 K                                                                  |                                                                 |                            |
| Volume                 | <b>Calculated</b><br>4426.94(5)                                        | <b>Reported</b><br>4426.94(5)                                   |                            |
| Space group            | P 21/n                                                                 | P 1 21/n 1                                                      |                            |
| Hall group             | -P 2yn                                                                 | -P 2yn                                                          |                            |
| Moiety formula         | C <sub>23</sub> H <sub>25</sub> NO <sub>6</sub> <sup>+</sup> [solvent] | 2(C <sub>23</sub> H <sub>25</sub> NO <sub>6</sub> )             |                            |
| Sum formula            | C <sub>42</sub> H <sub>48</sub> N <sub>2</sub> O <sub>6</sub> S        | C <sub>42</sub> H <sub>48</sub> N <sub>2</sub> O <sub>6</sub> S |                            |
| Mr                     | 411.44                                                                 | 822.88                                                          |                            |
| Dx, g cm <sup>-3</sup> | 1.235                                                                  | 1.235                                                           |                            |
| Z                      | 8                                                                      | 4                                                               |                            |
| Mu (mm <sup>-1</sup> ) | 0.737                                                                  | 0.737                                                           |                            |
| F000                   | 1744.0                                                                 | 1744.0                                                          |                            |
| F000'                  | 1749.71                                                                |                                                                 |                            |
| h,k,lmax               | 25,10,32                                                               | 25,10,32                                                        |                            |
| Nref                   | 9282                                                                   | 9077                                                            |                            |
| Tmin,Tmax              | 0.876,0.929                                                            |                                                                 |                            |
| Tmin'                  | 0.863                                                                  |                                                                 |                            |
| Correction method=     | Not given                                                              |                                                                 |                            |



|                              |                                 |
|------------------------------|---------------------------------|
| Data completeness= 0.978     | Theta(max)= 76.327              |
| R(reflections)= 0.0448(8426) | wR2(reflections)= 0.1270 (7236) |
| S = 1.032                    | Npar= 549                       |

---

## 7. Copies of $^1\text{H}$ , $^{13}\text{C}$ and $^{19}\text{F}$ NMR Spectra of Products

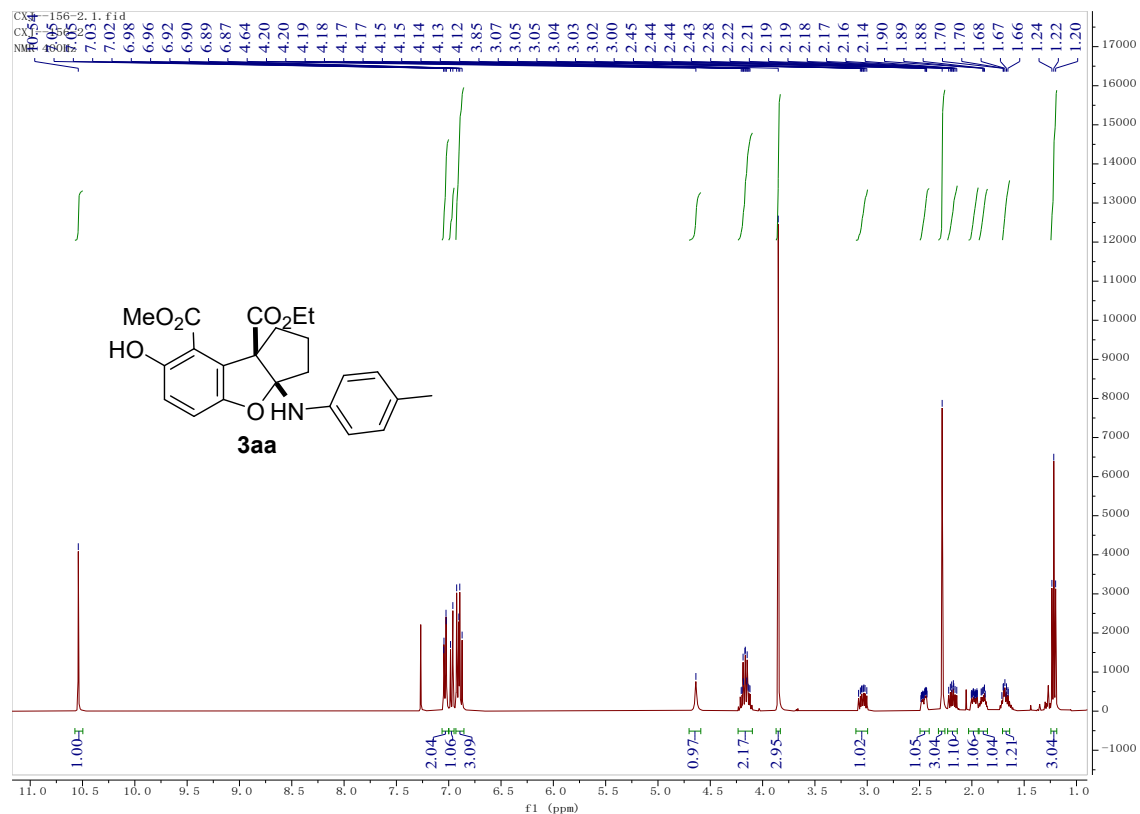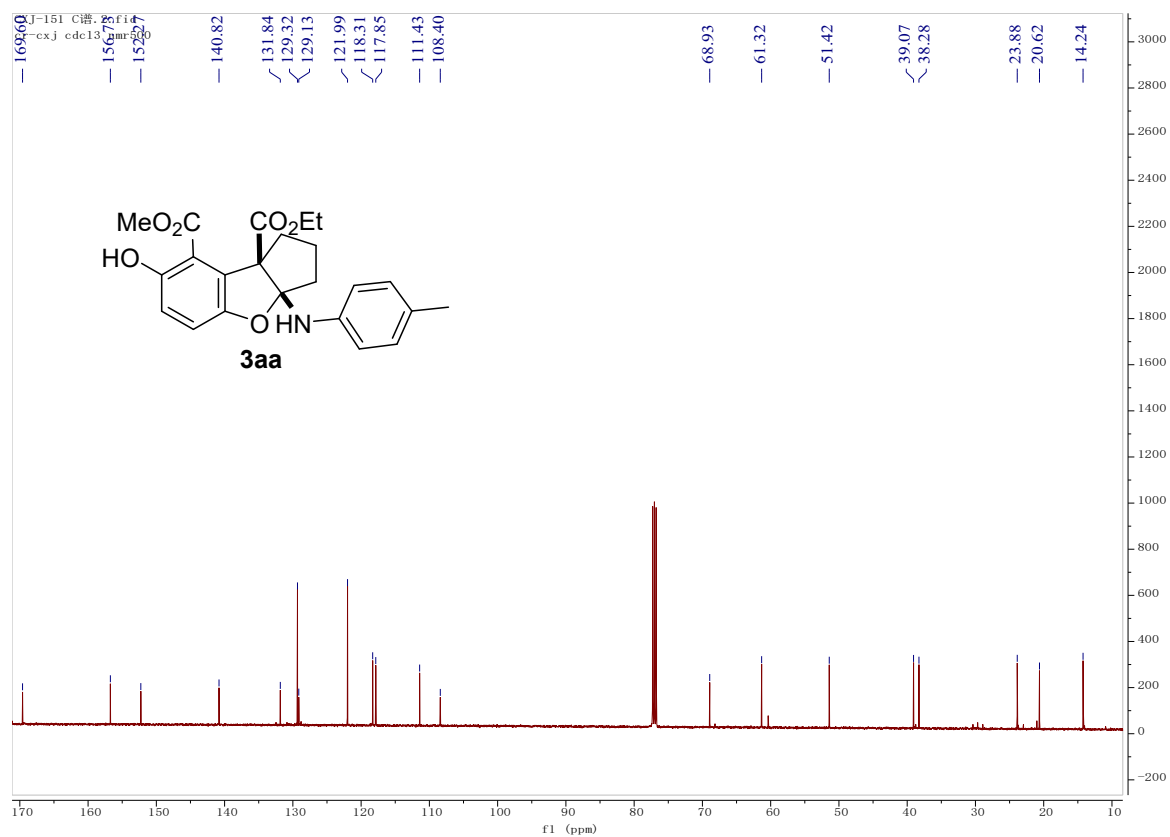

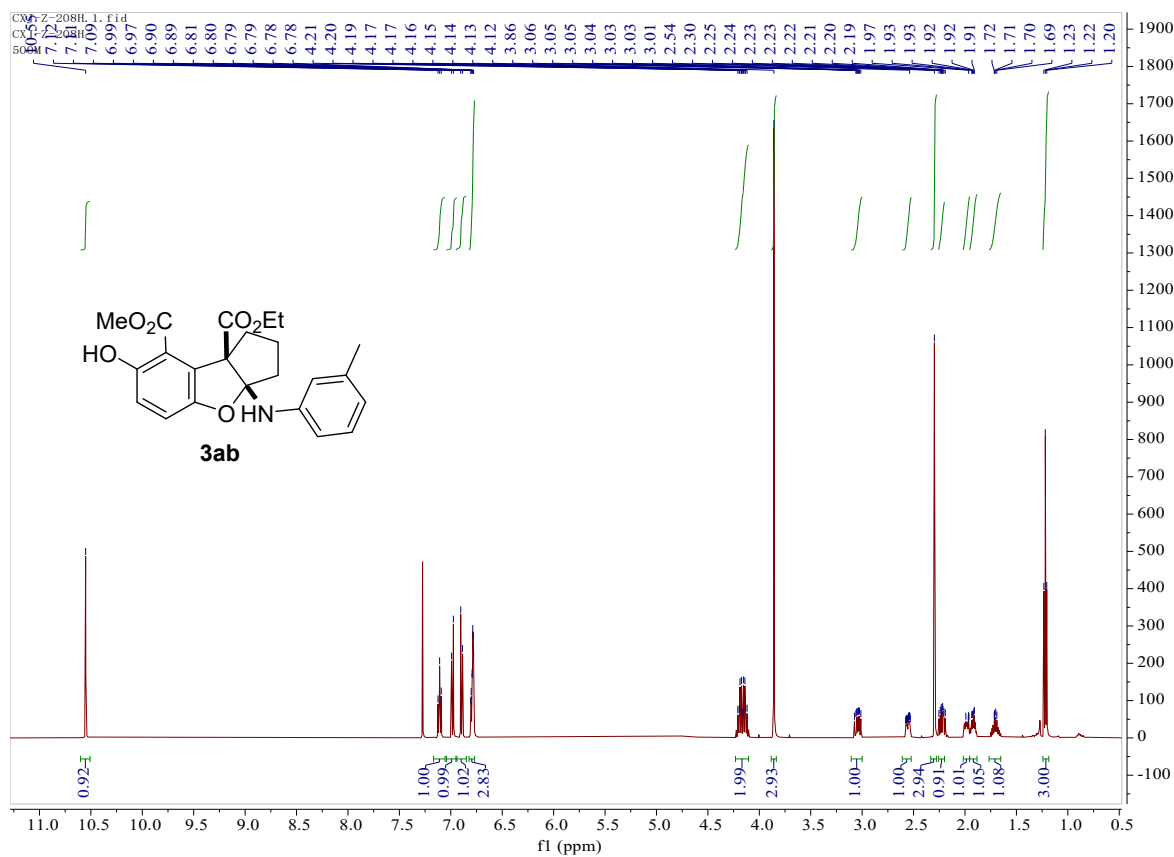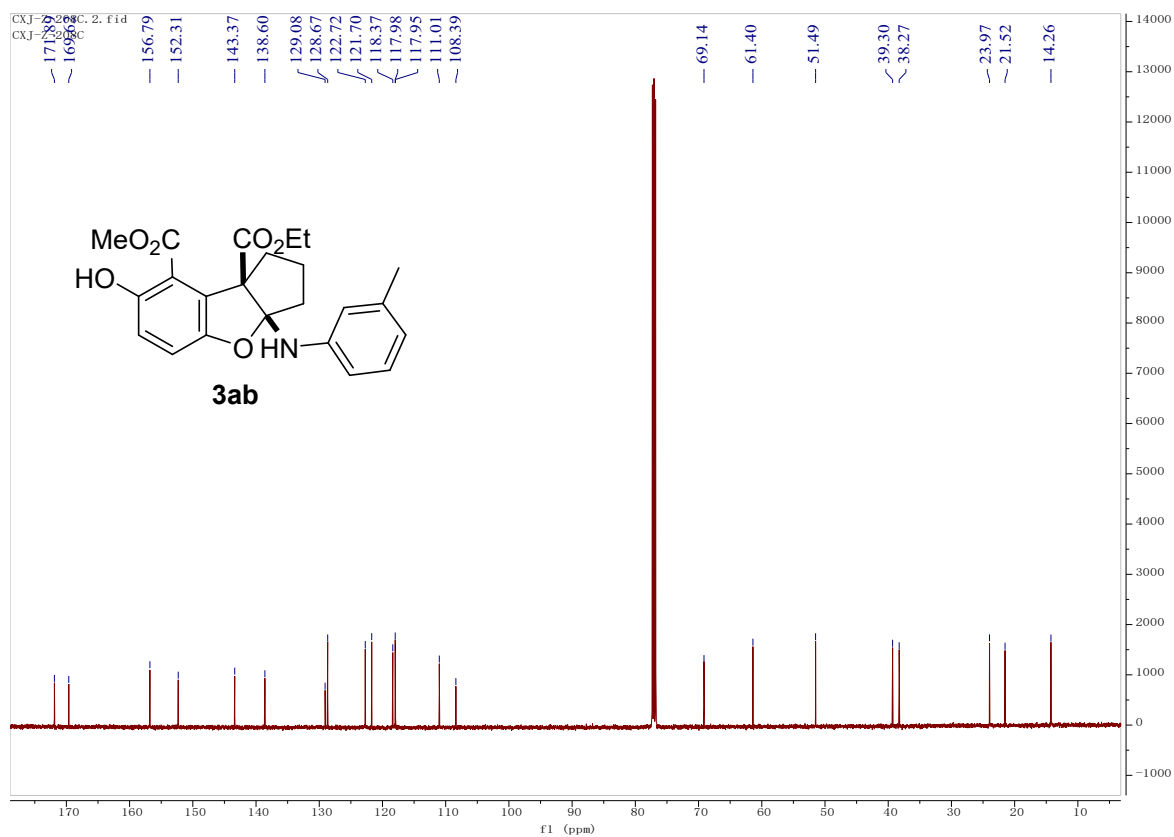

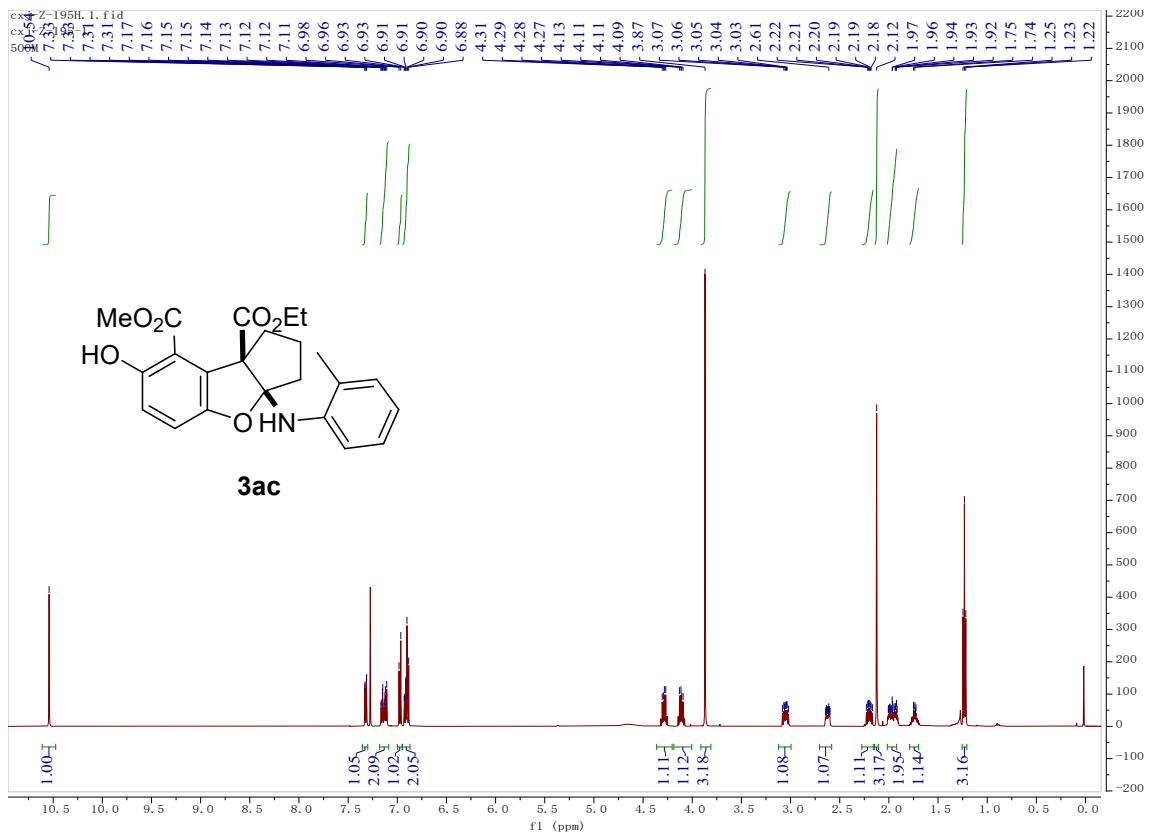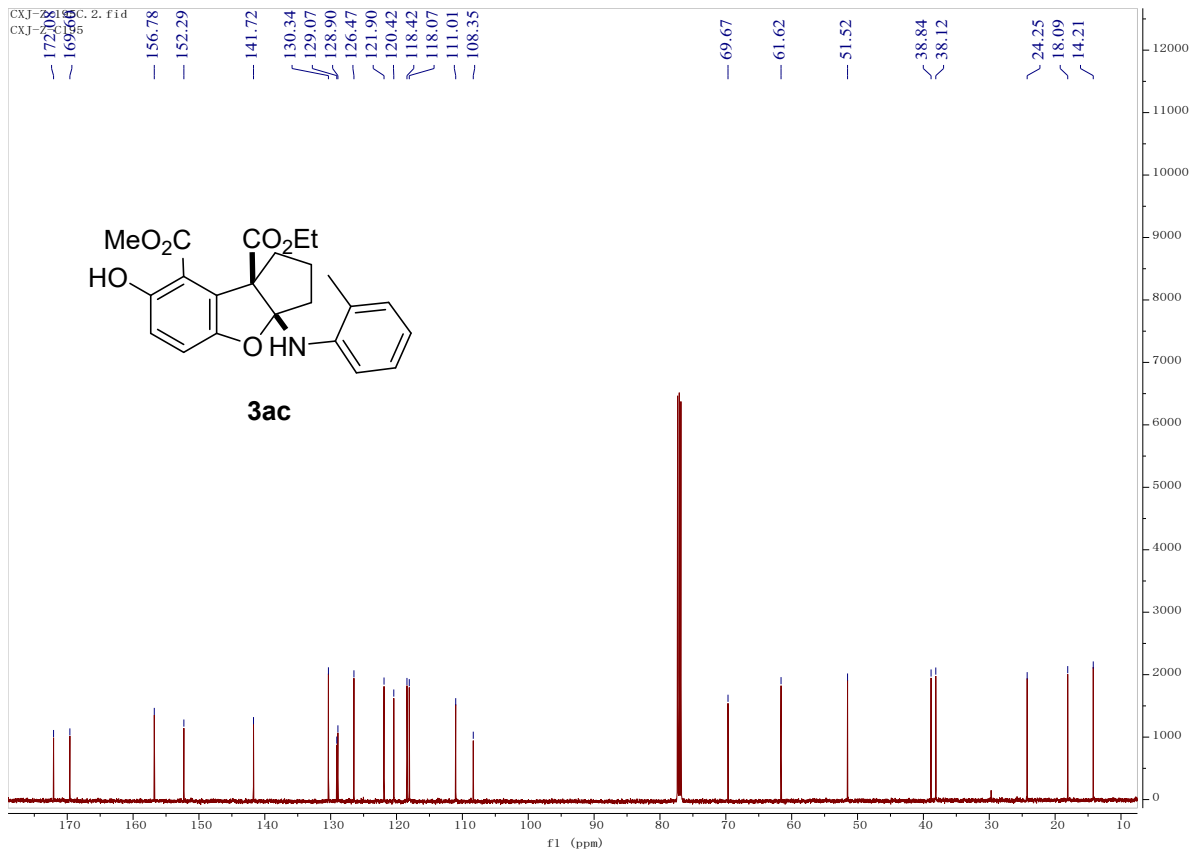

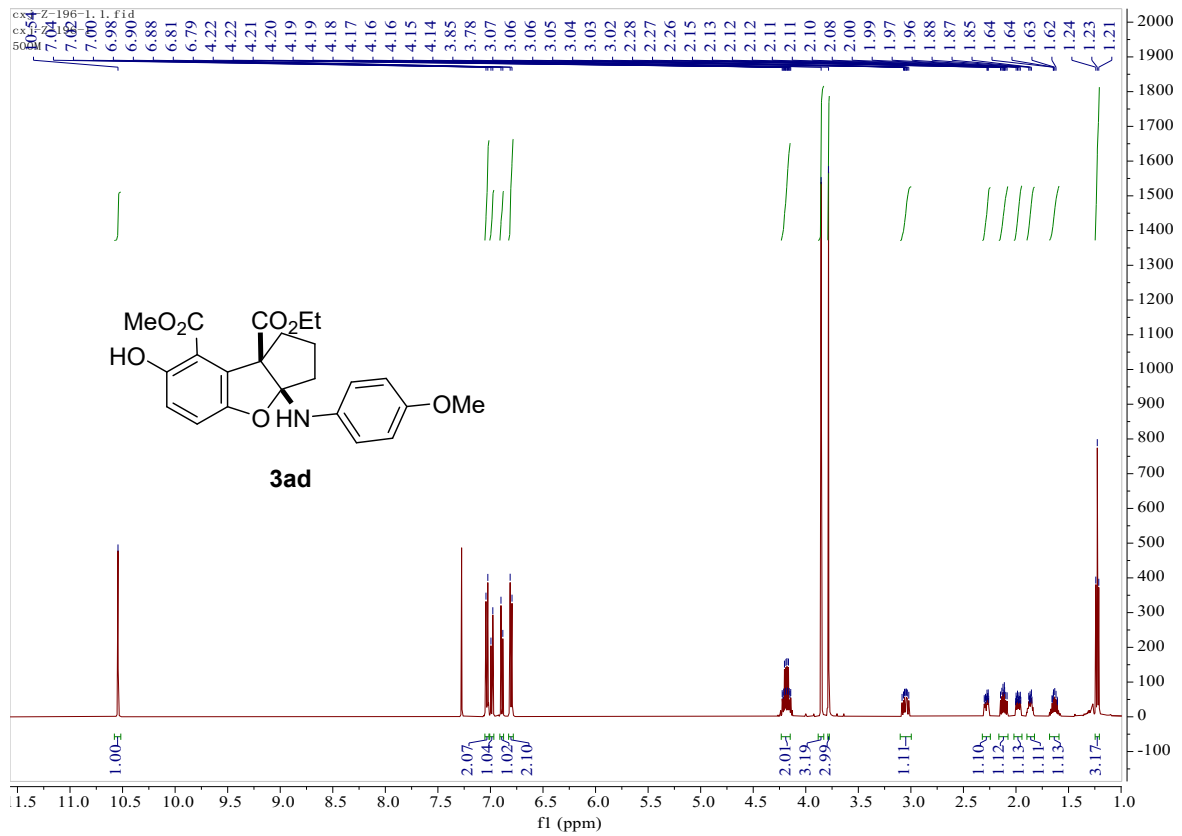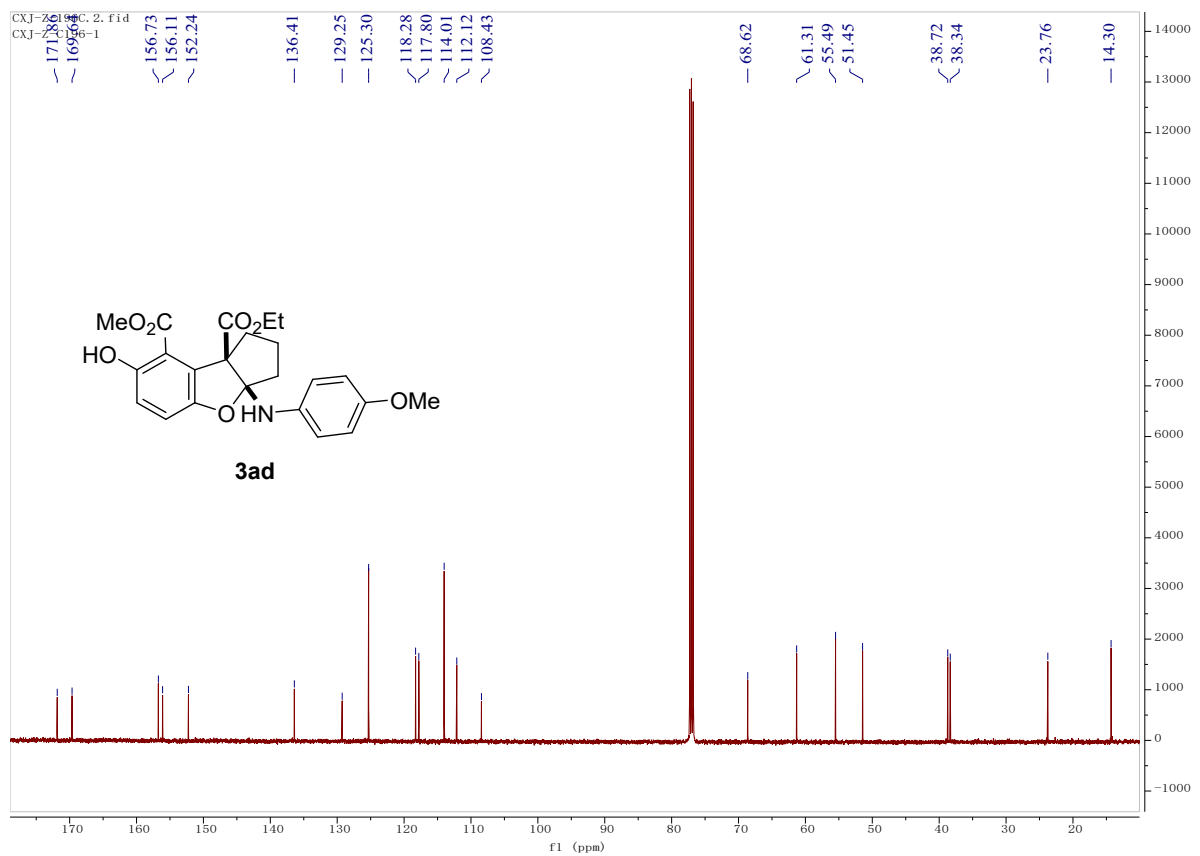

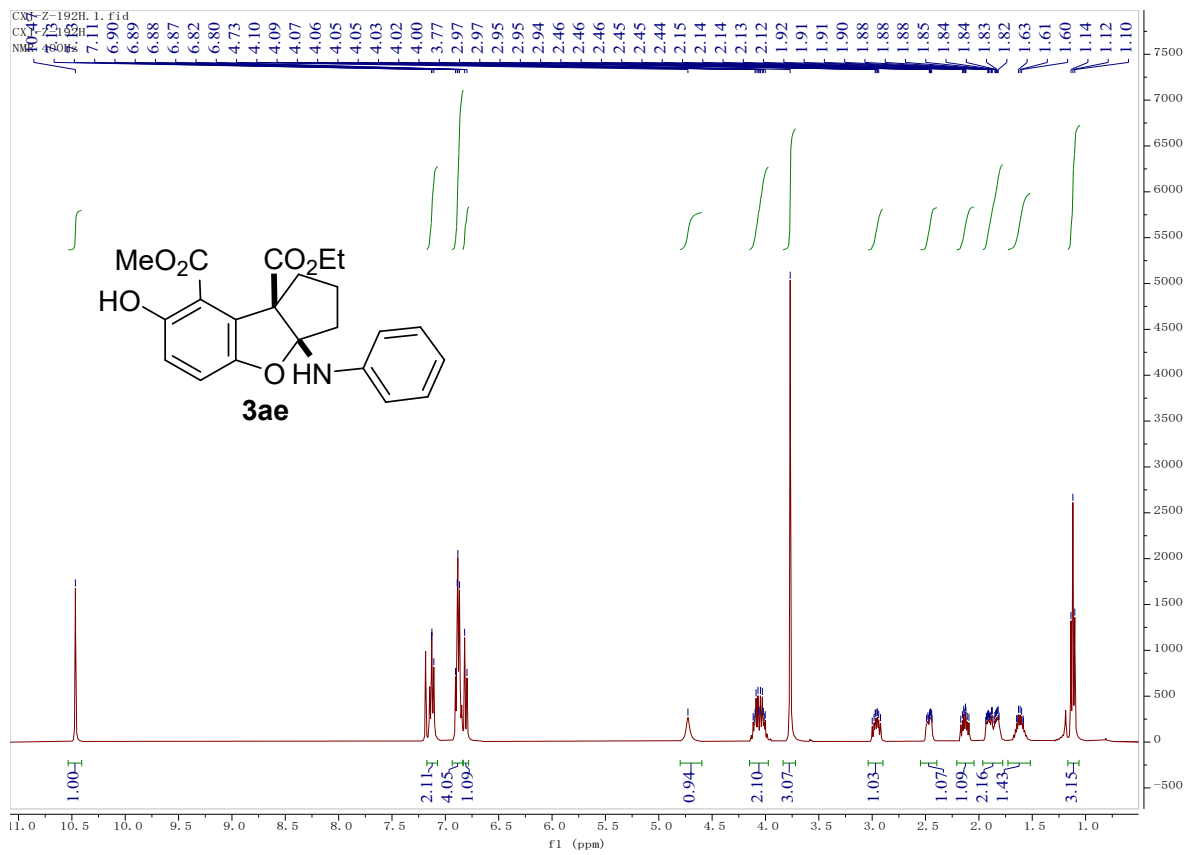

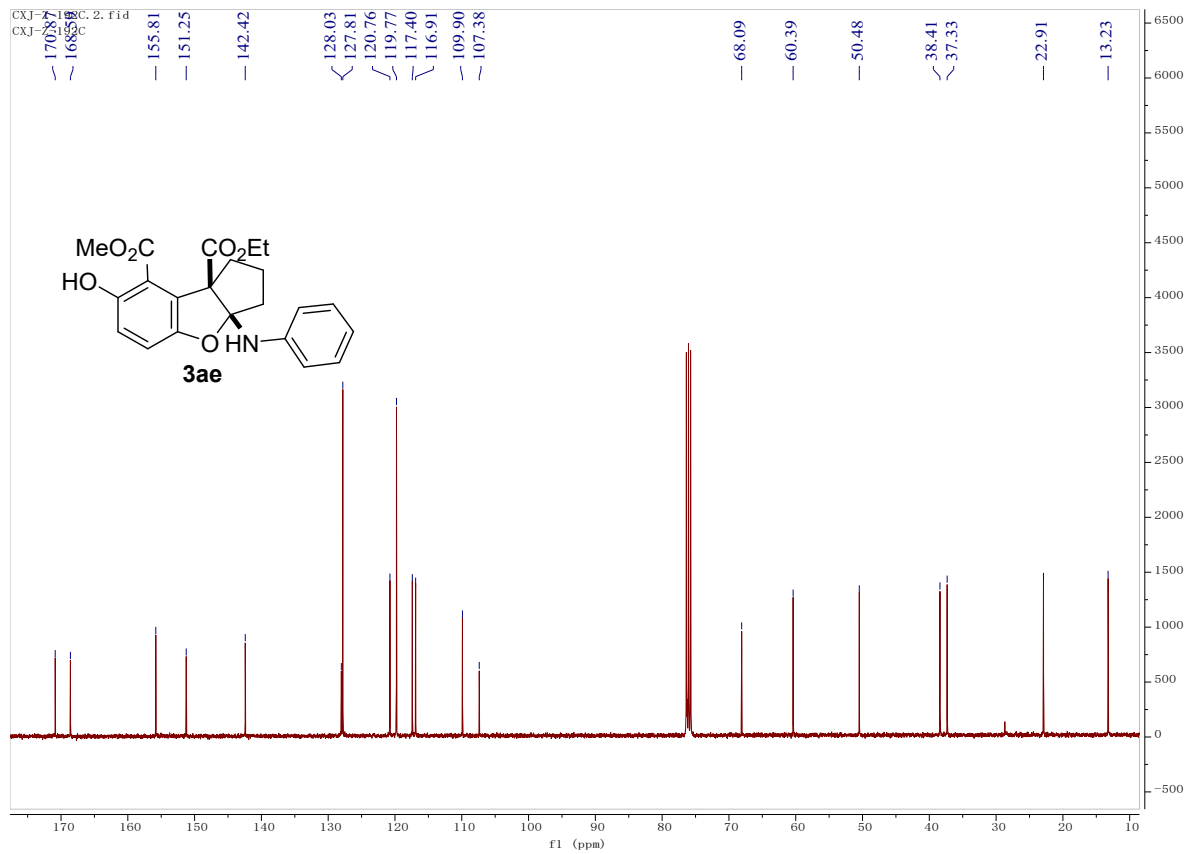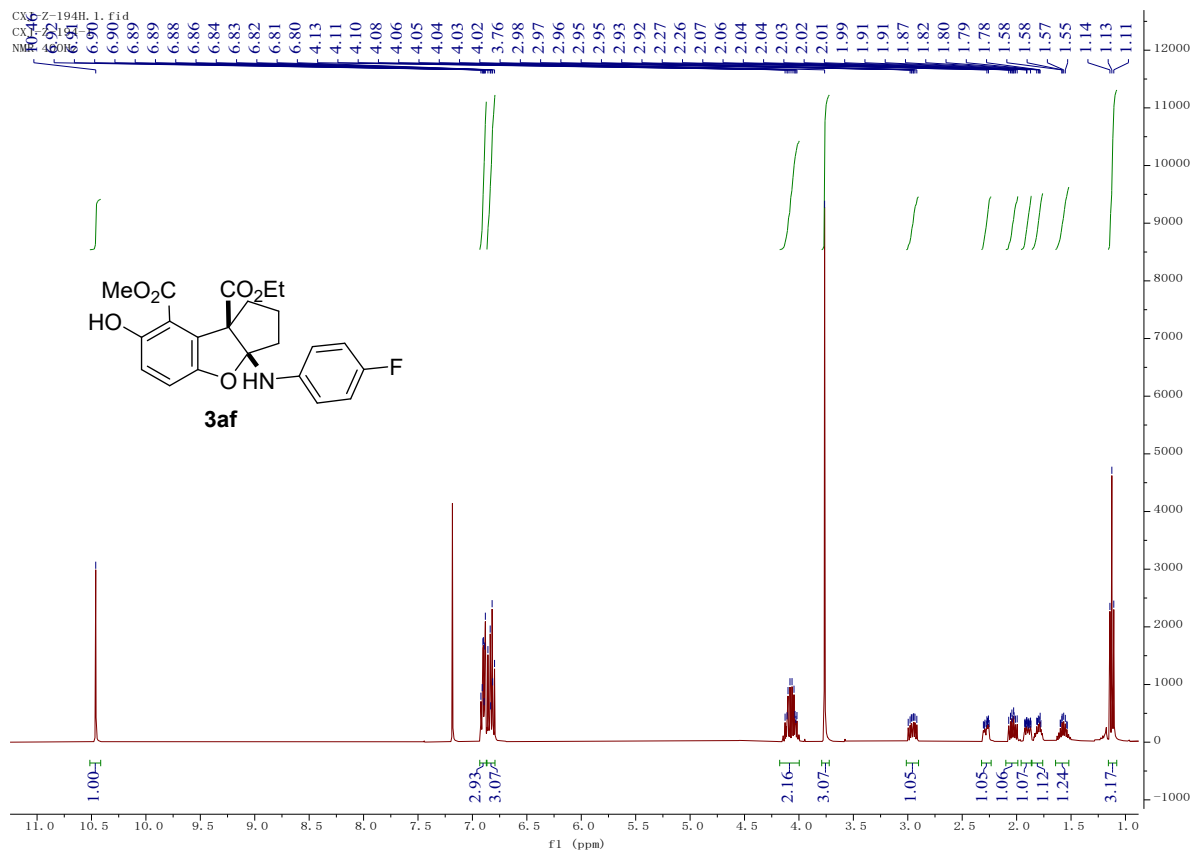

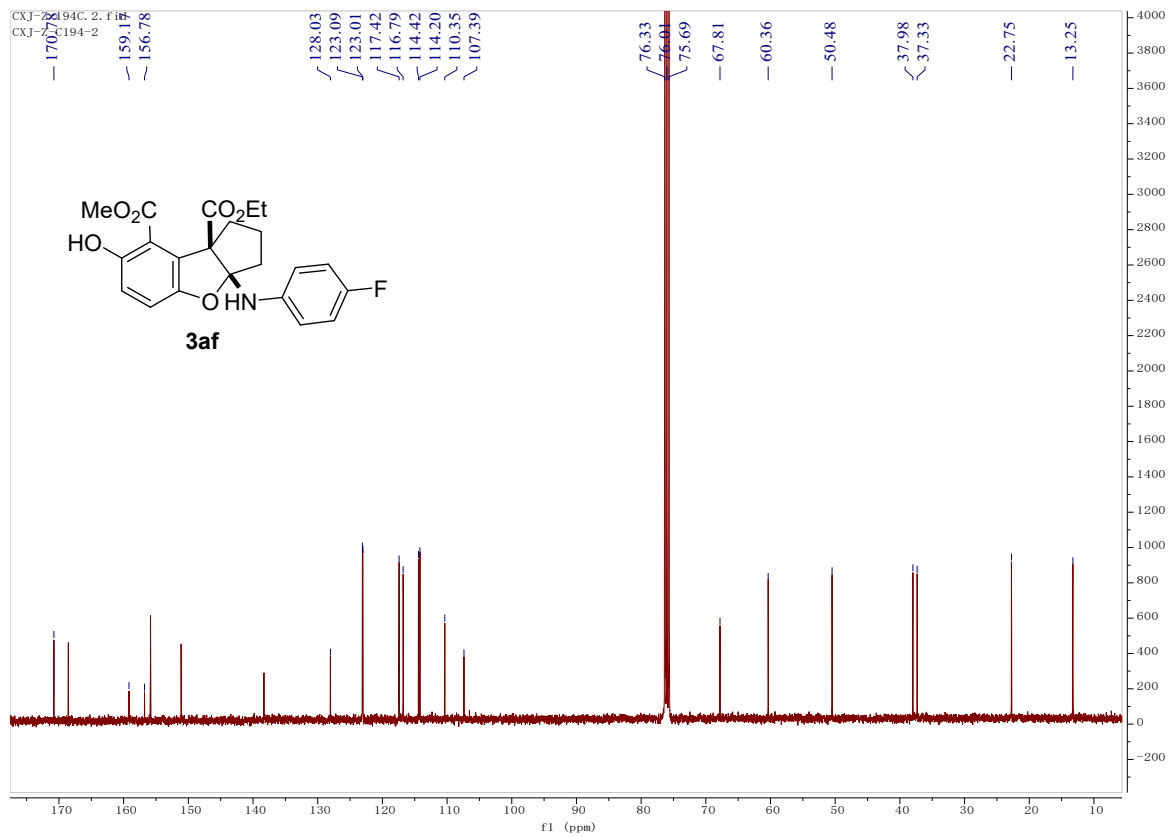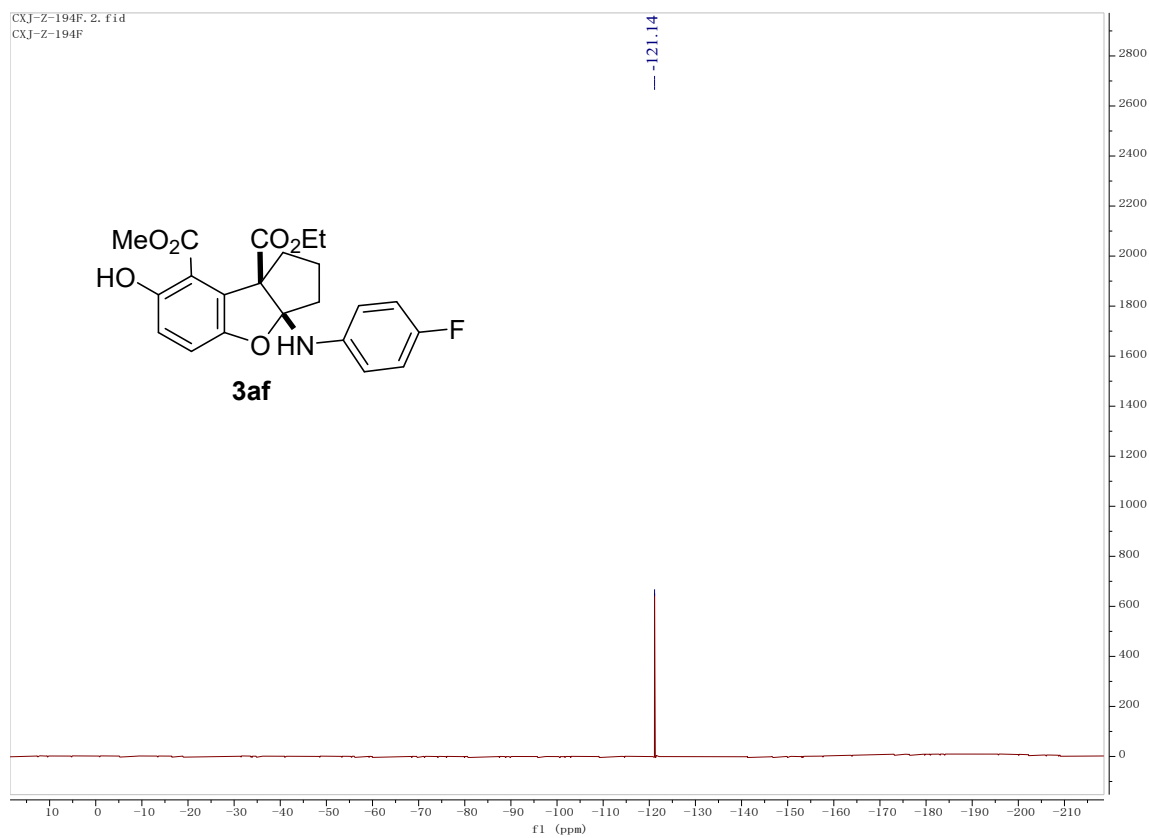



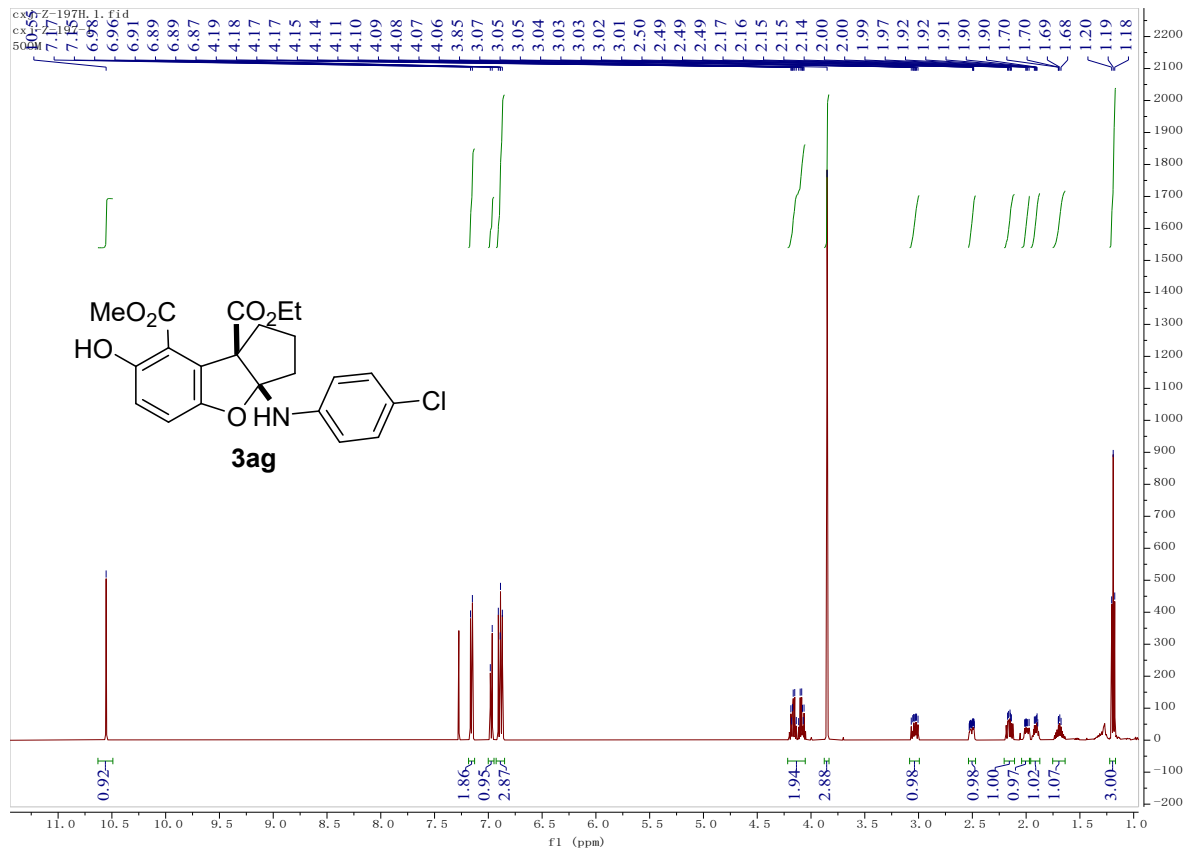

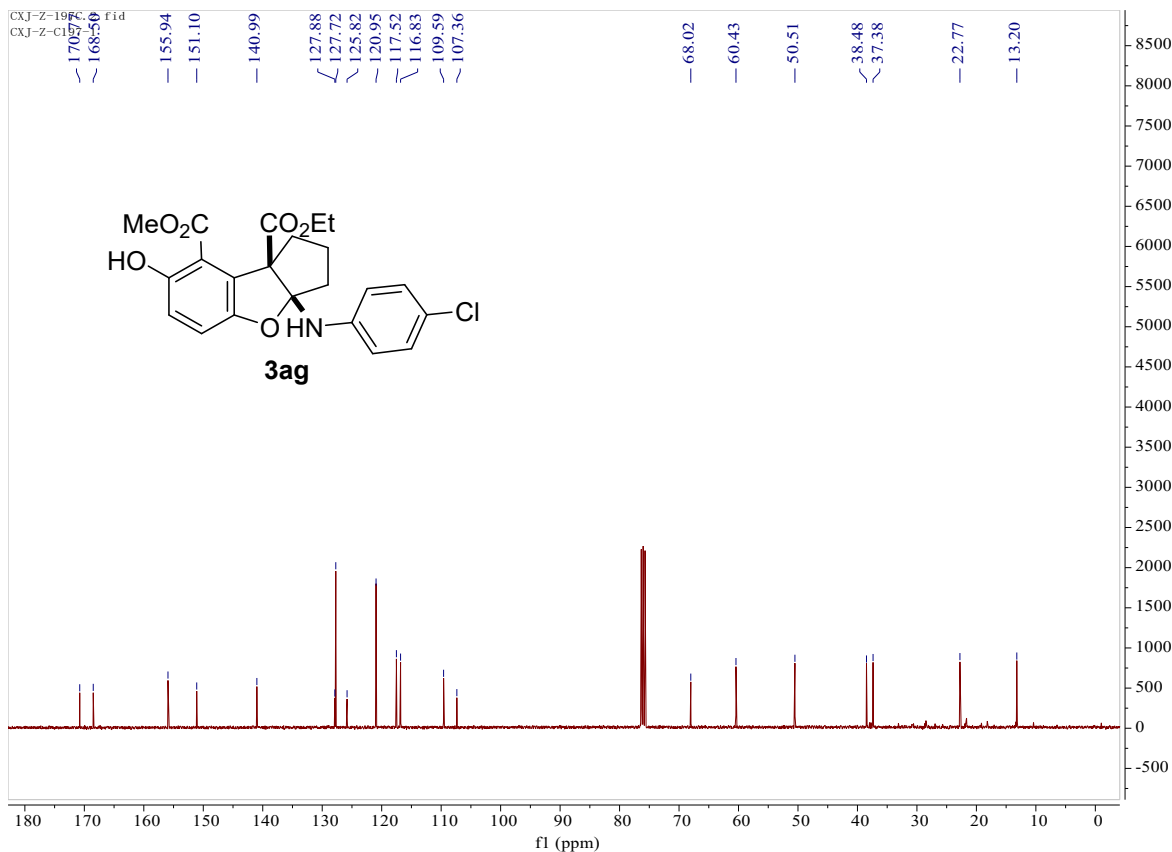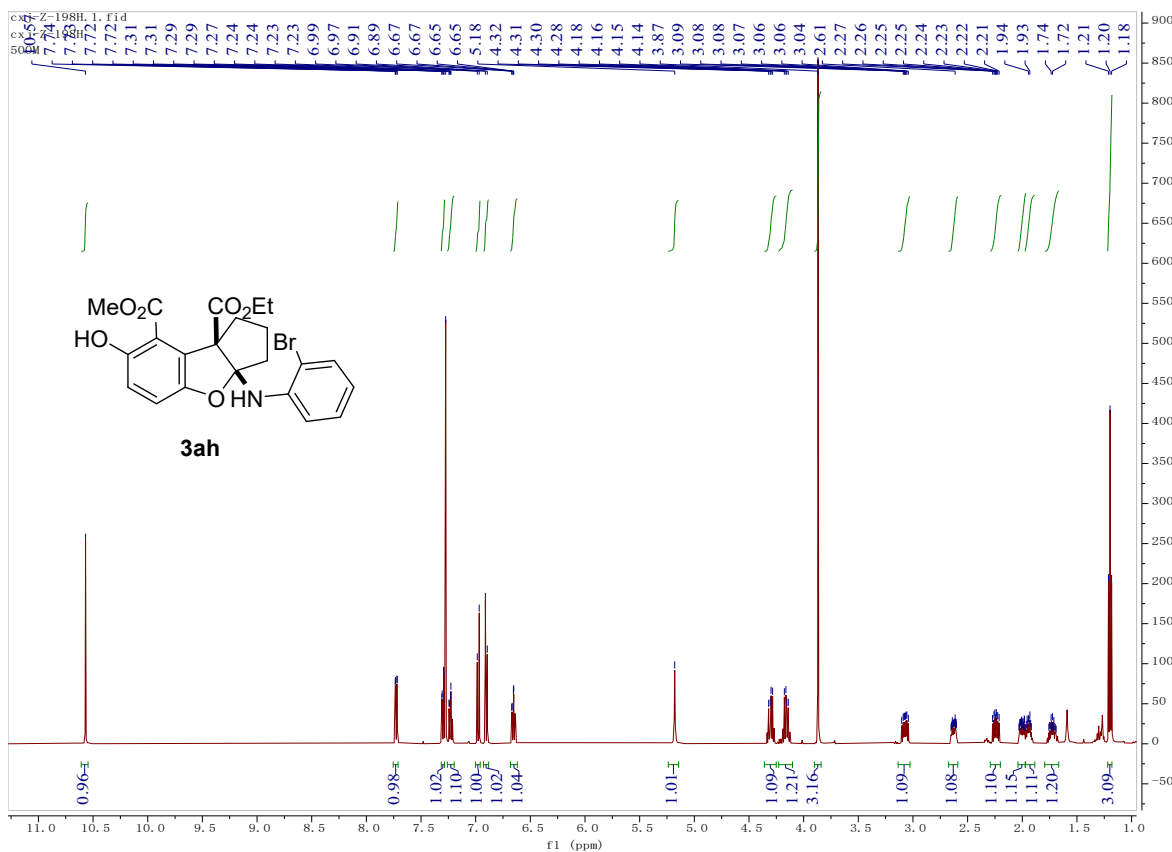

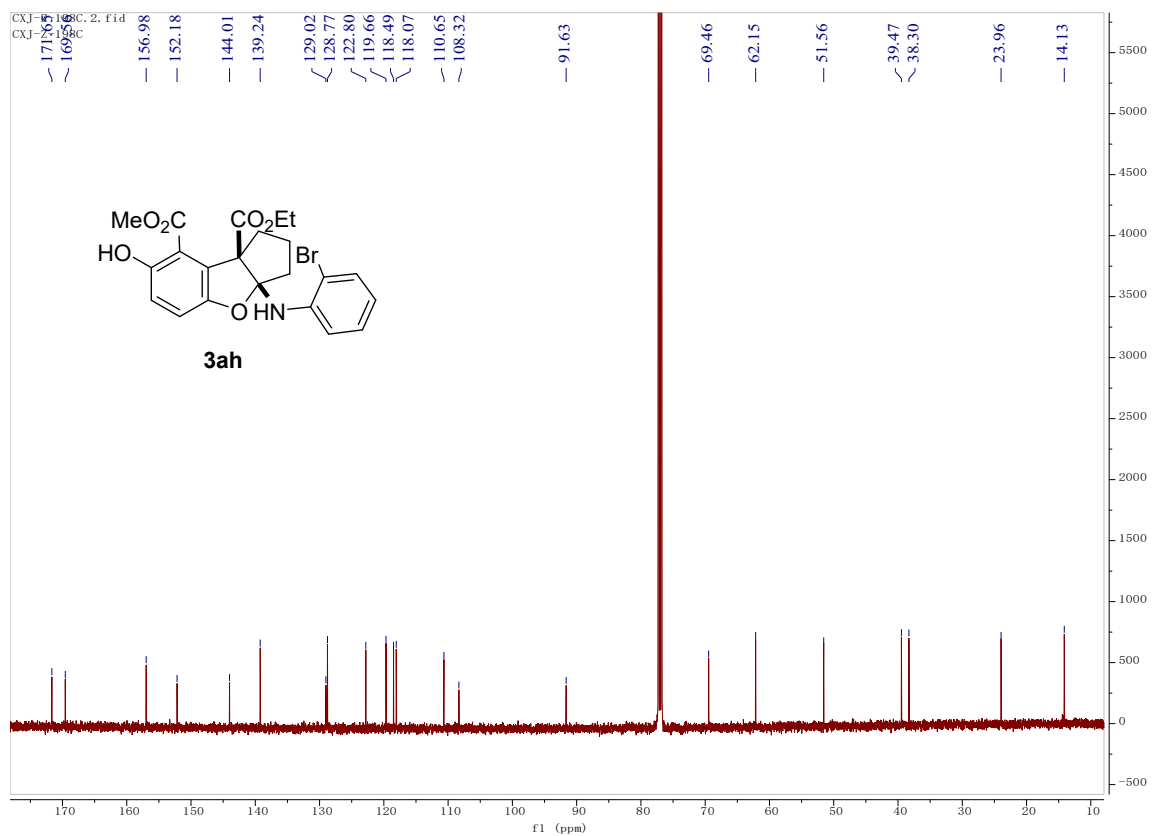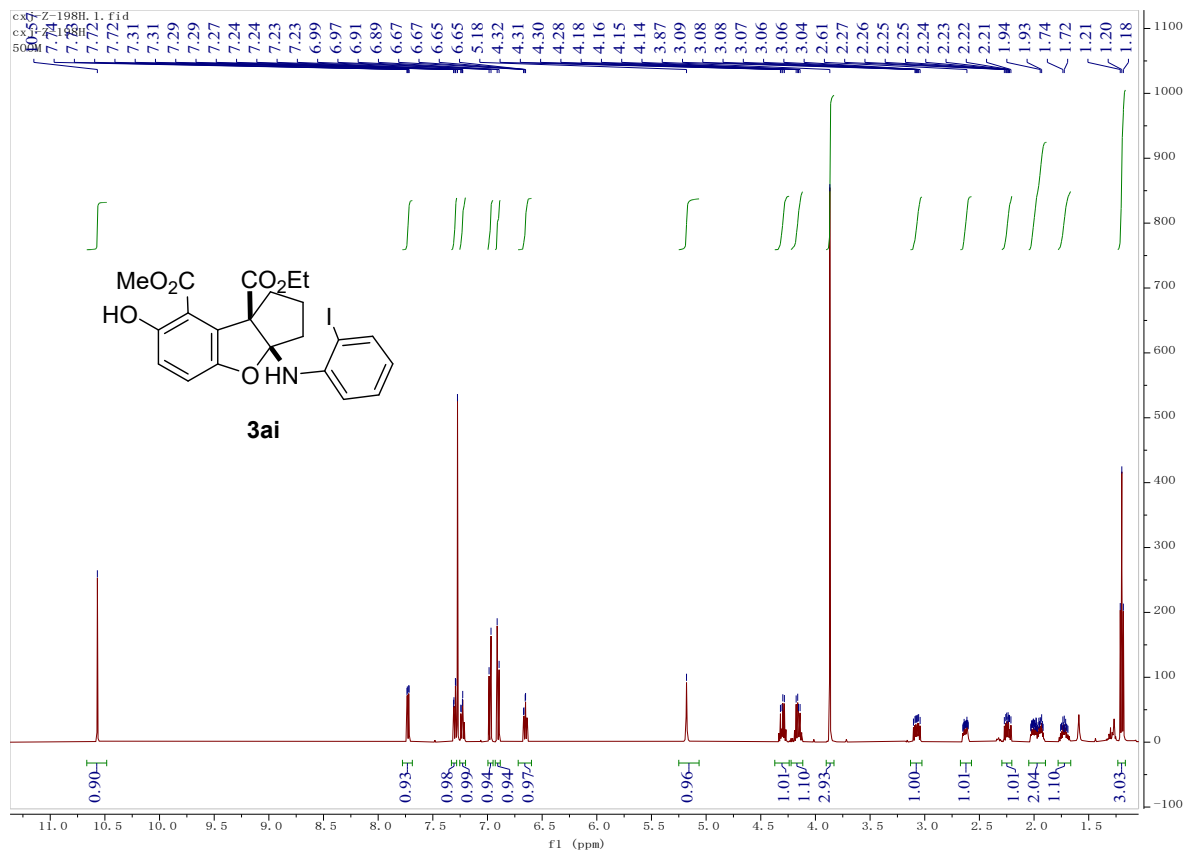

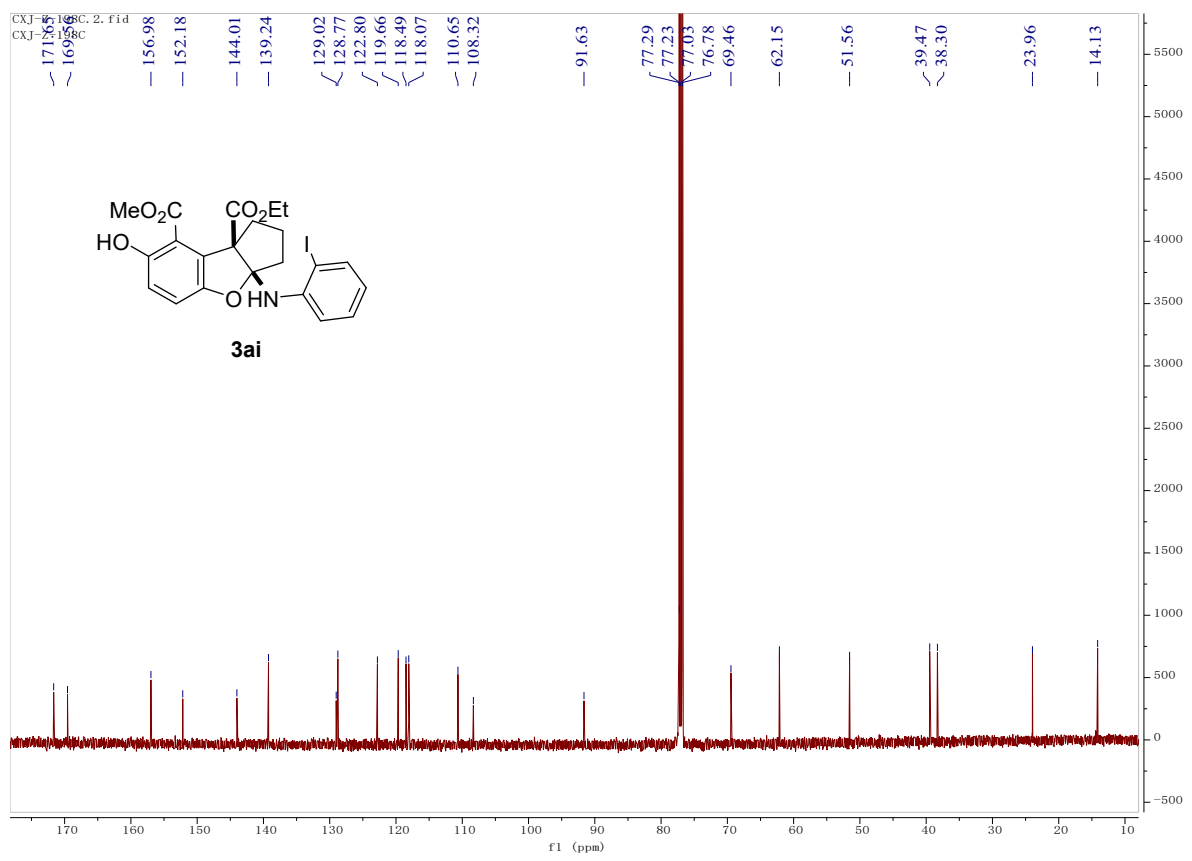

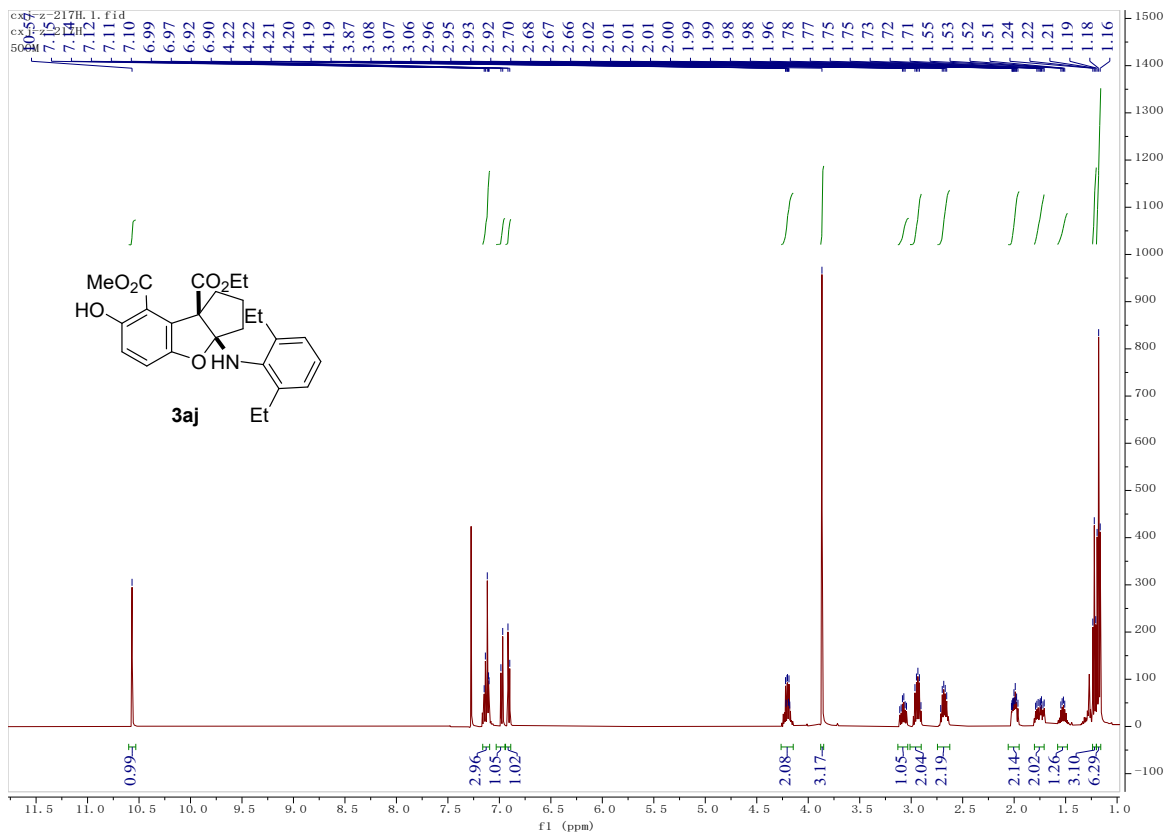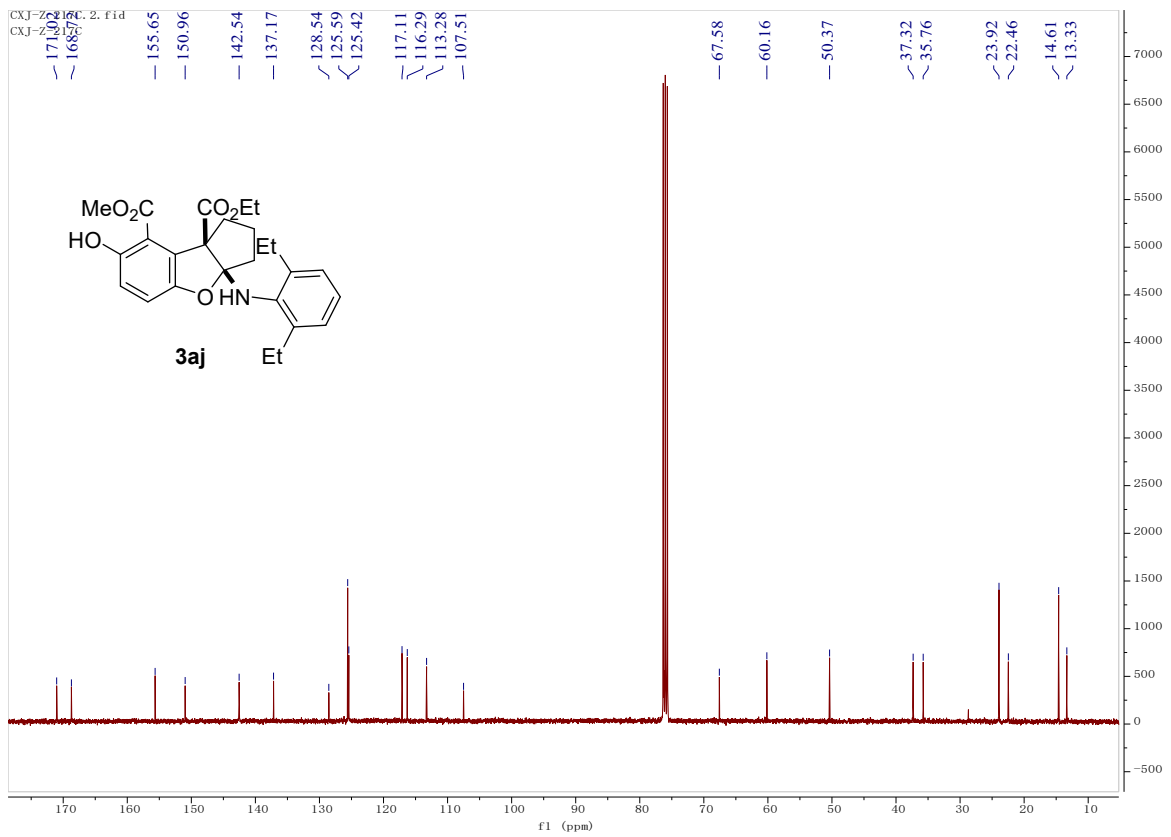

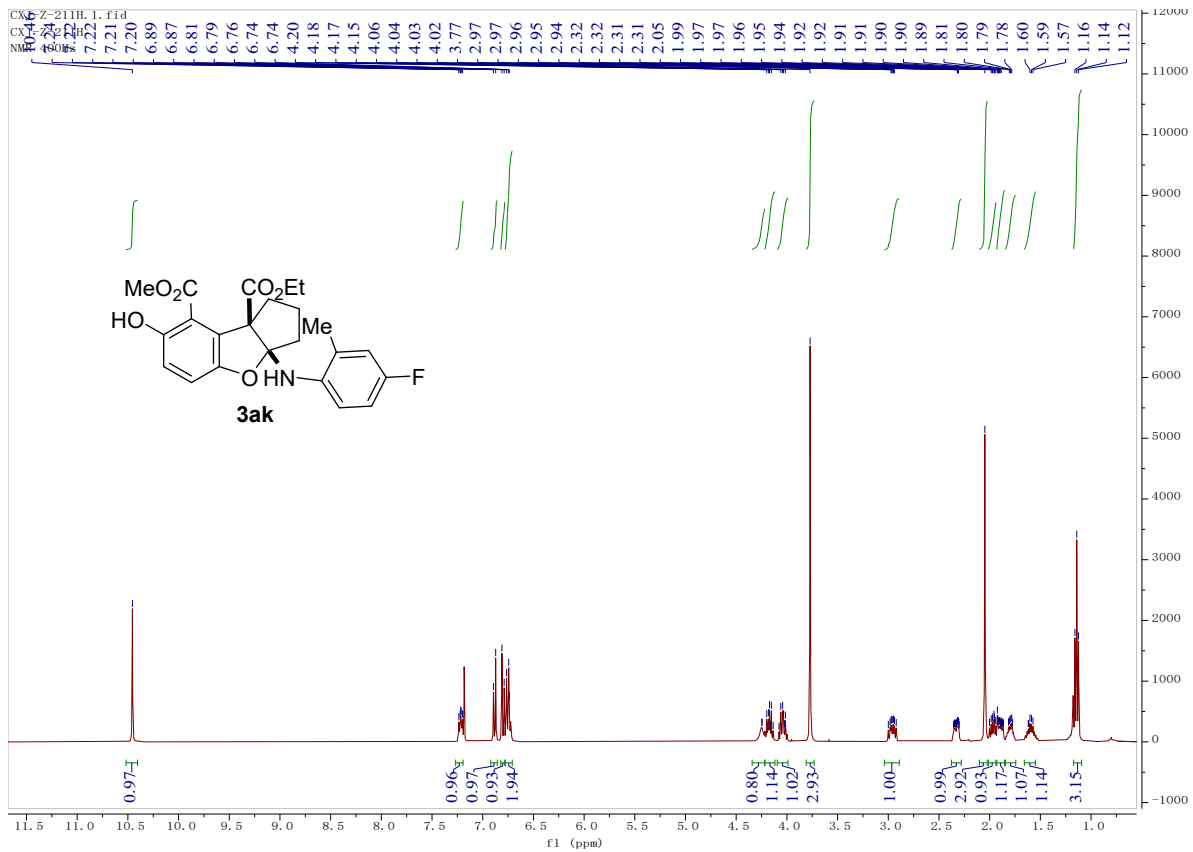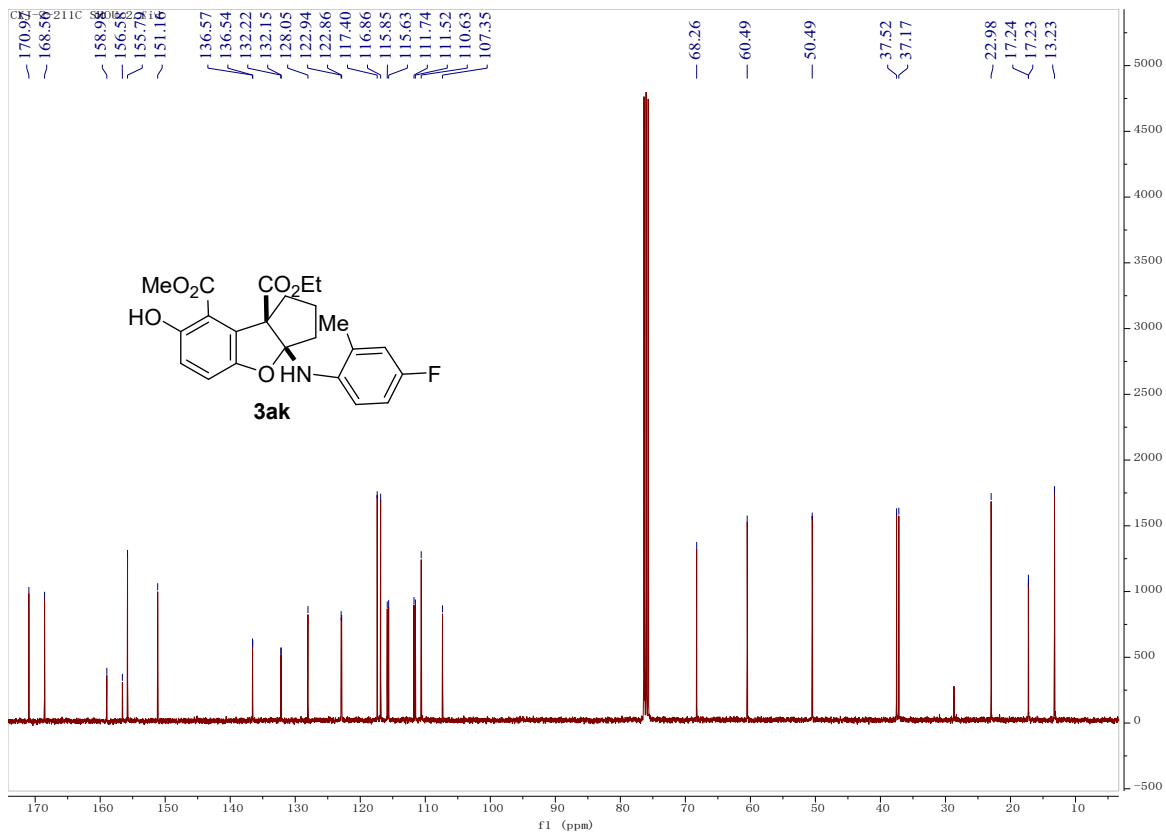

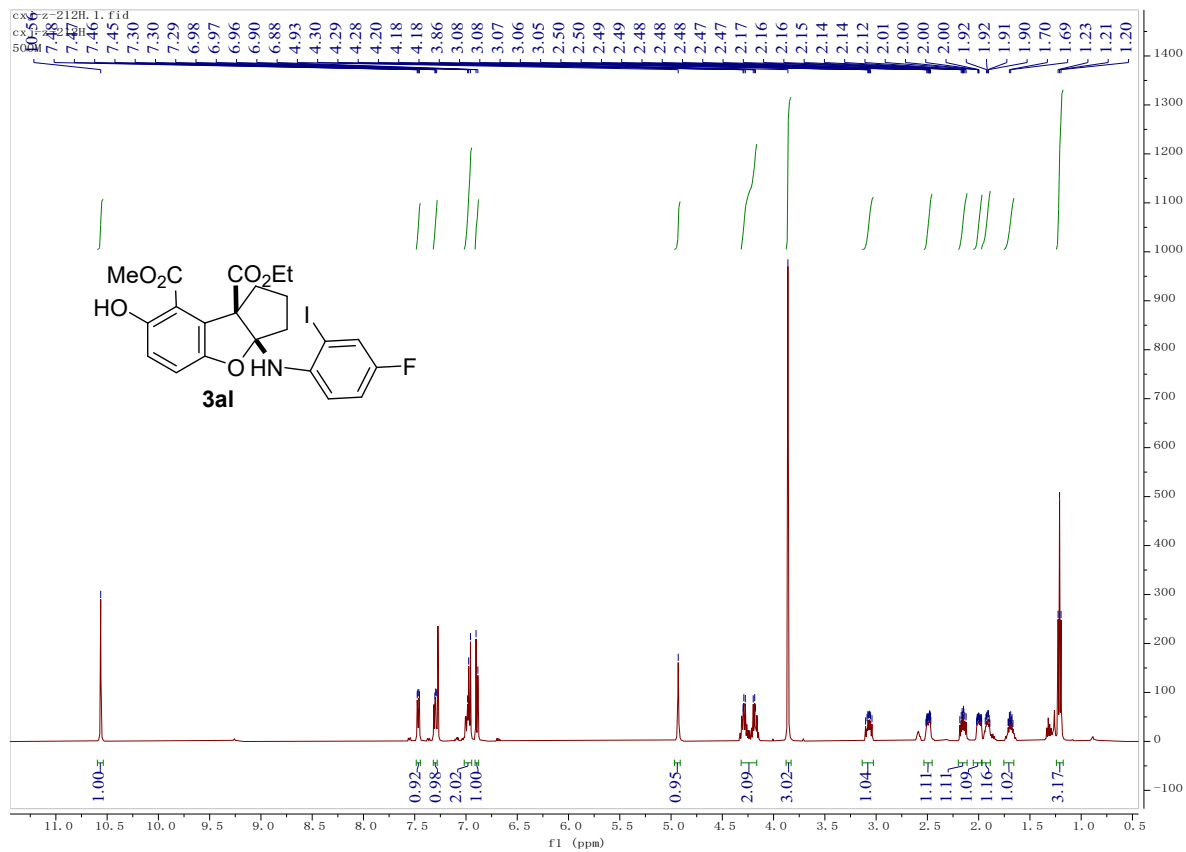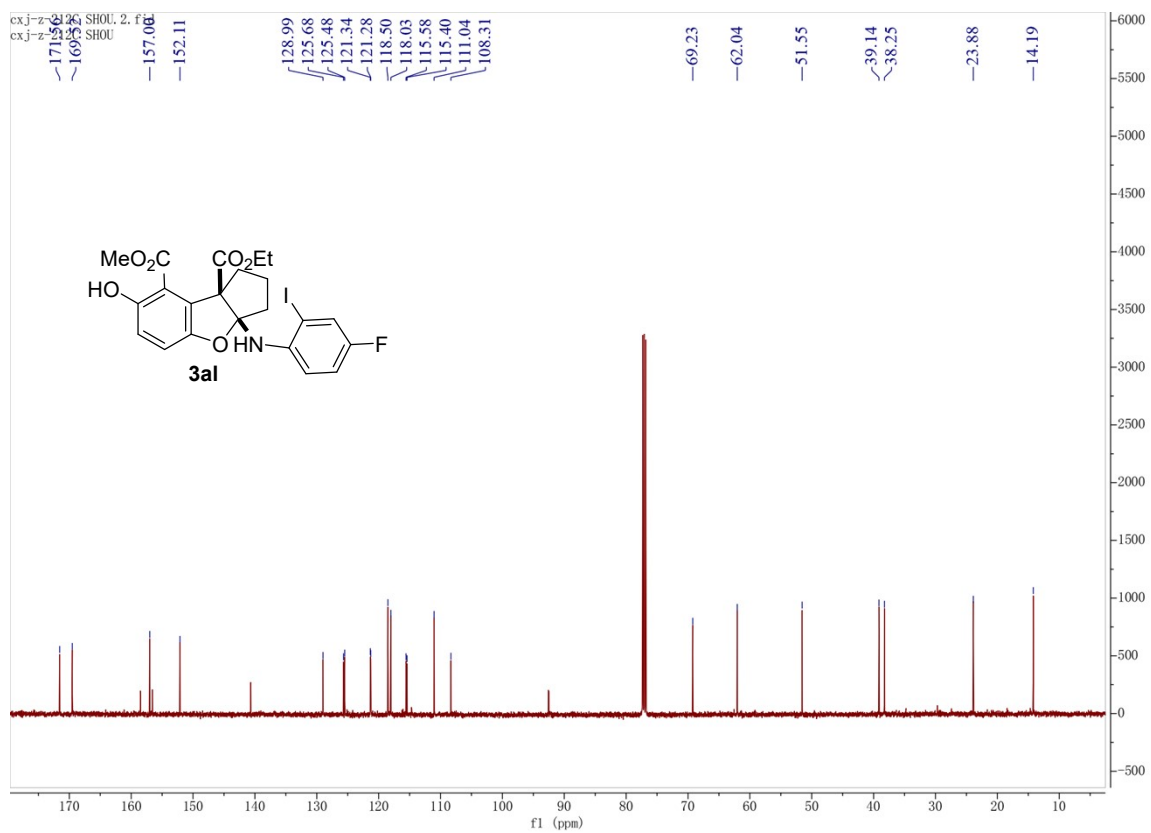

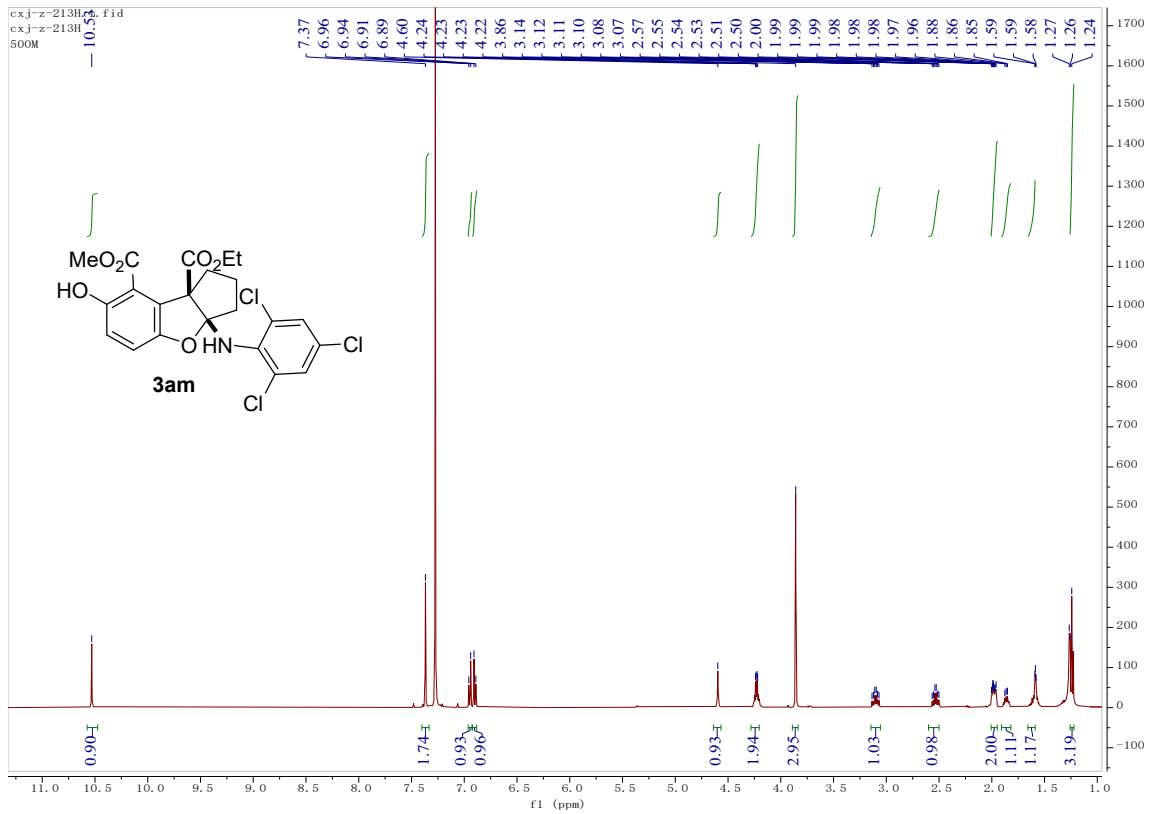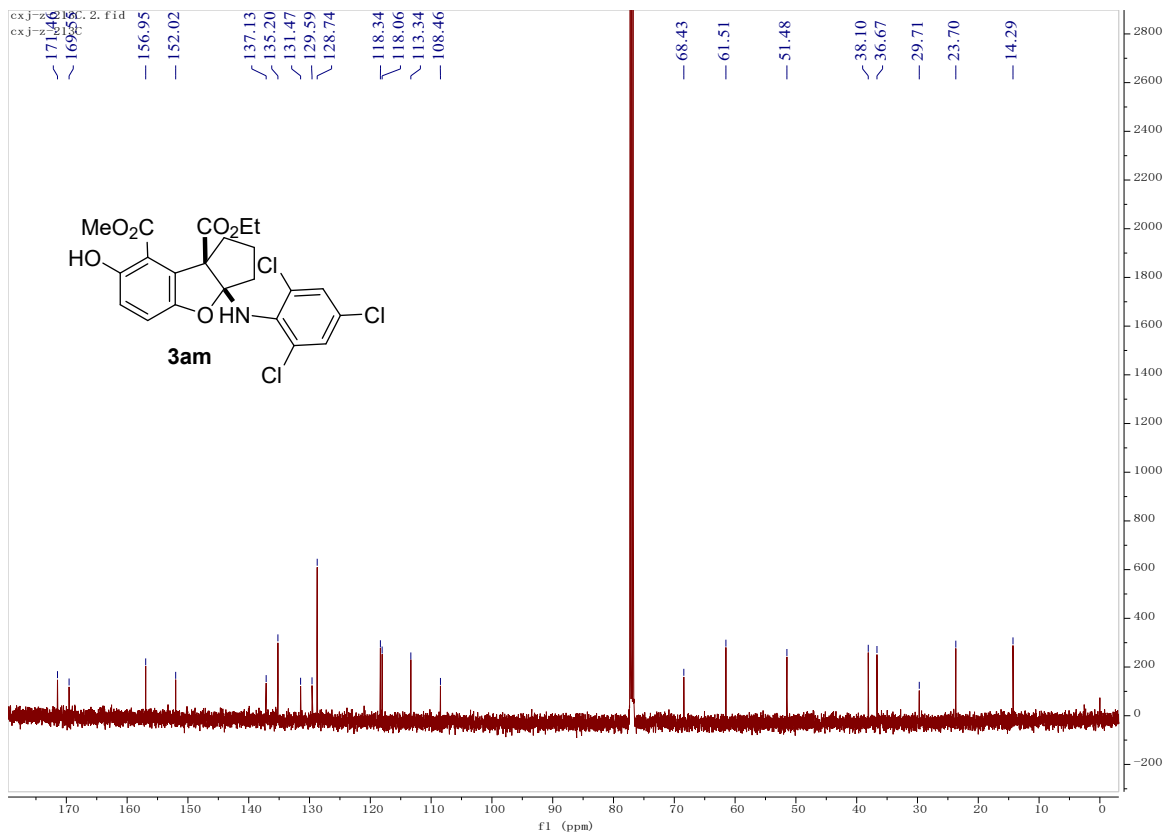



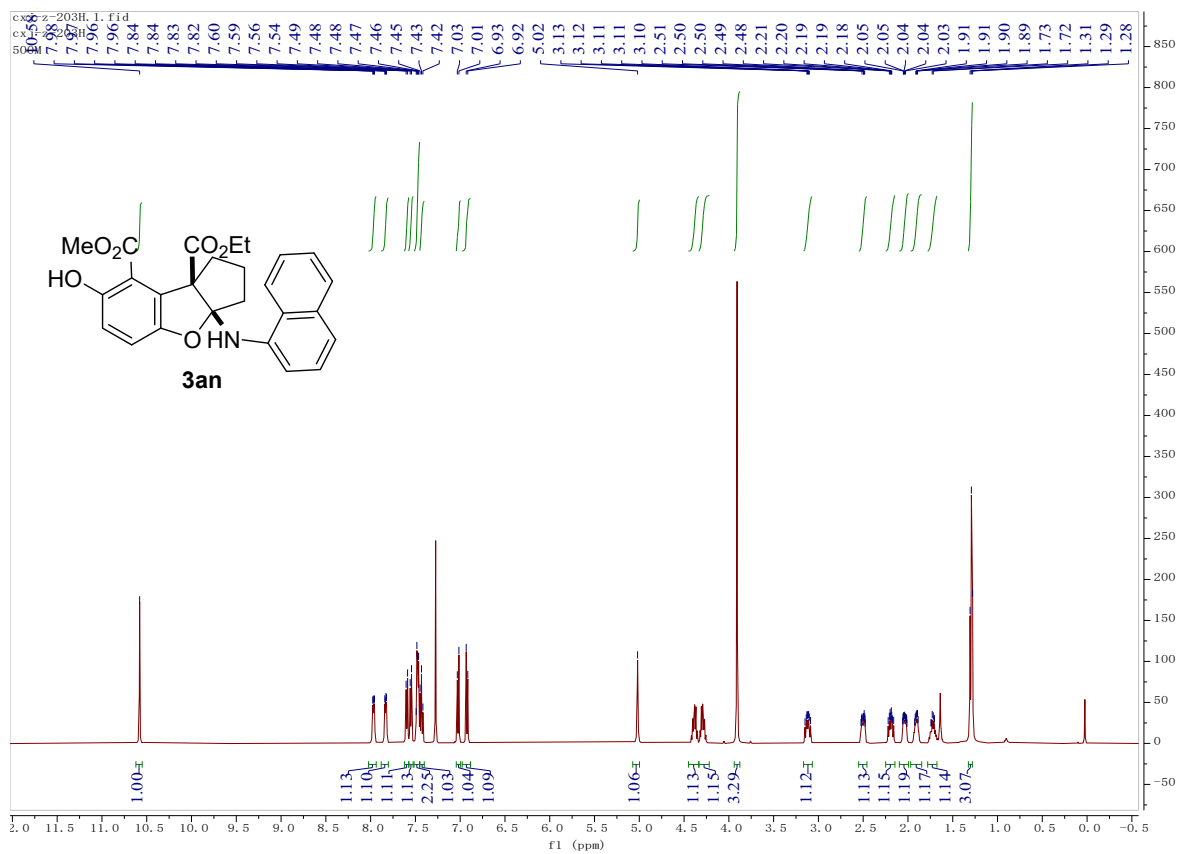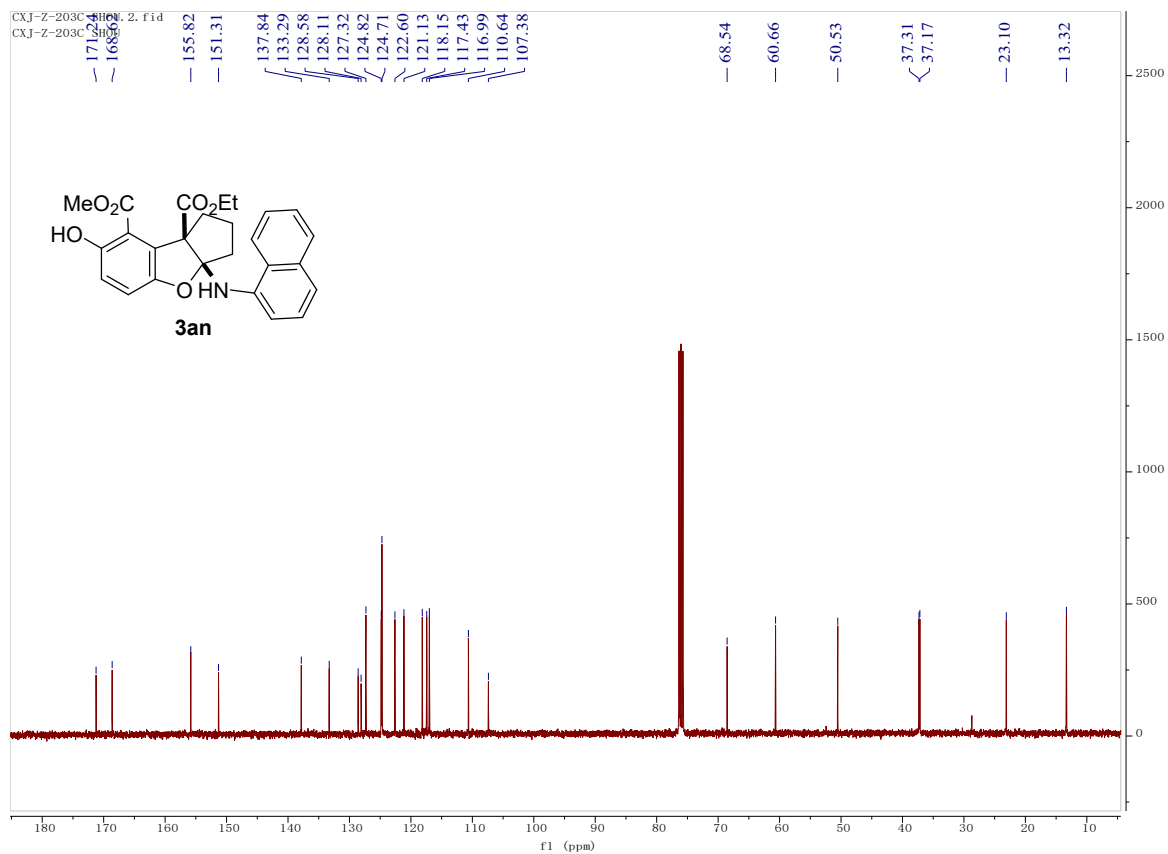

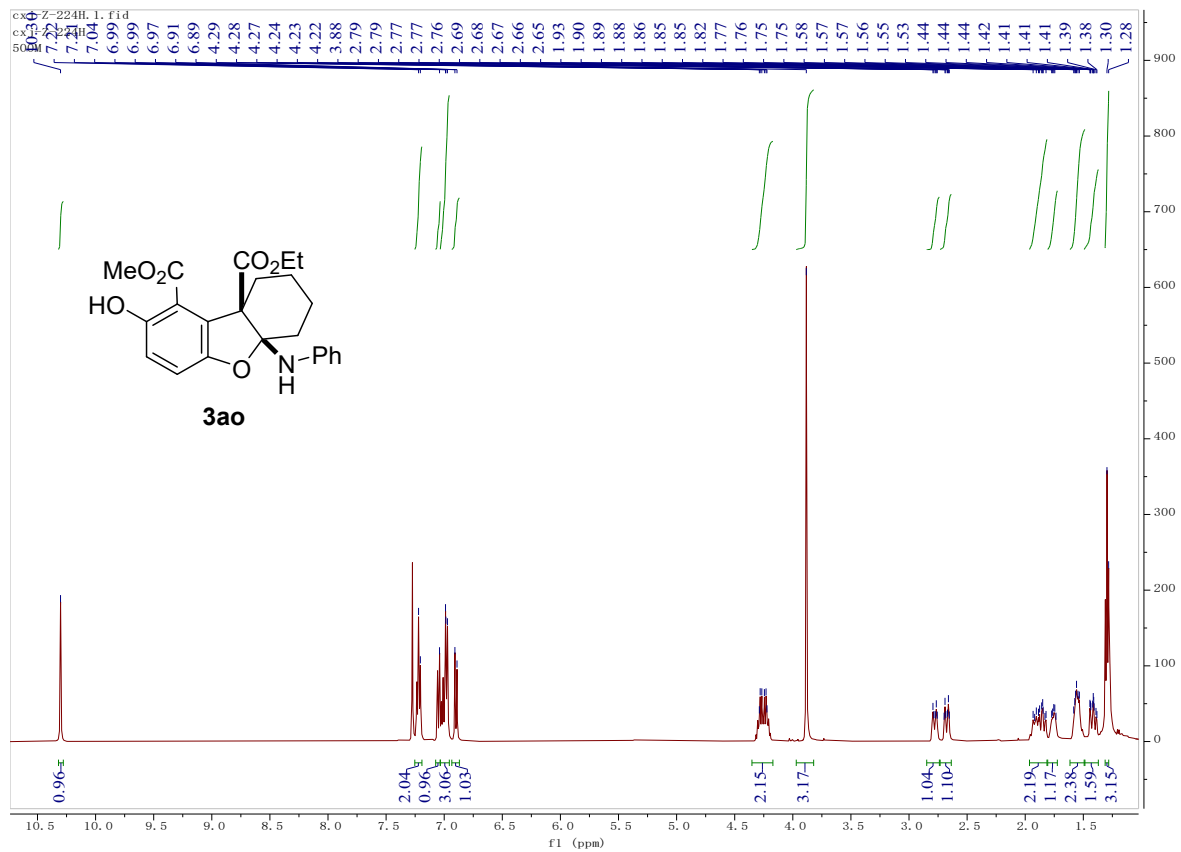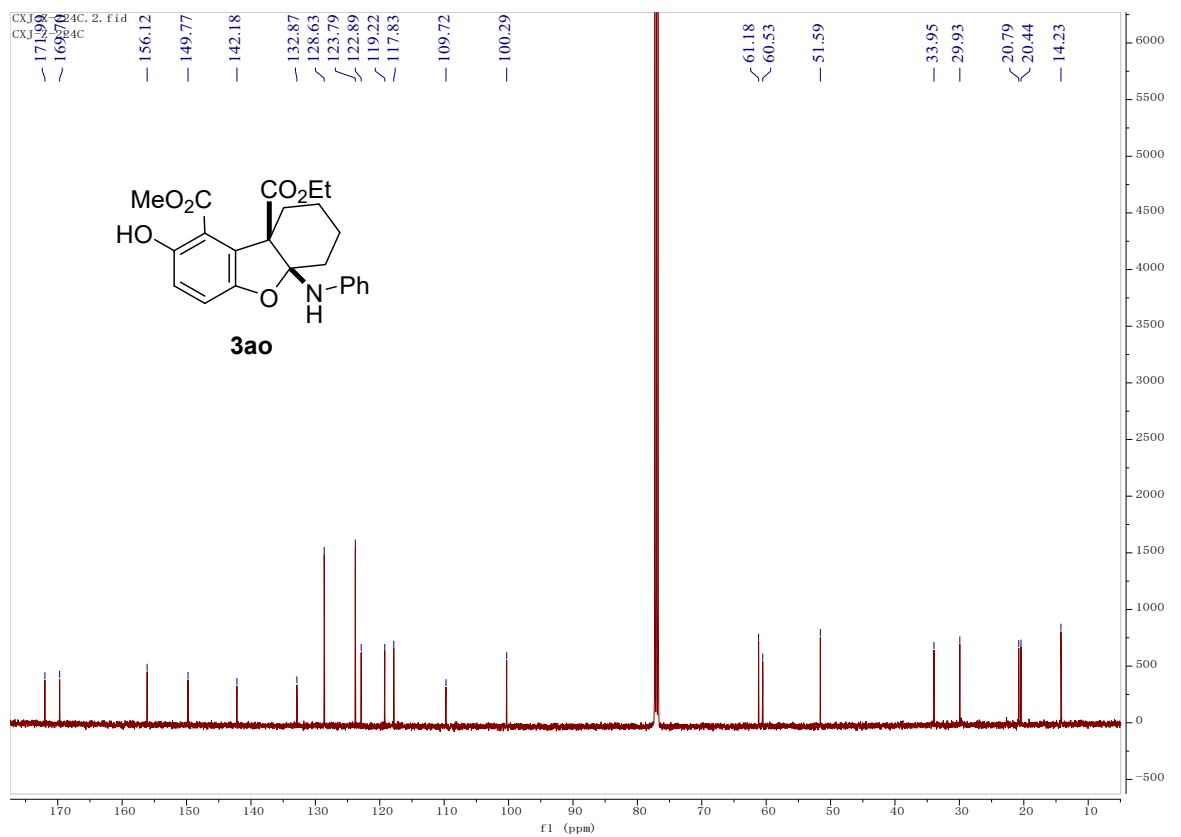

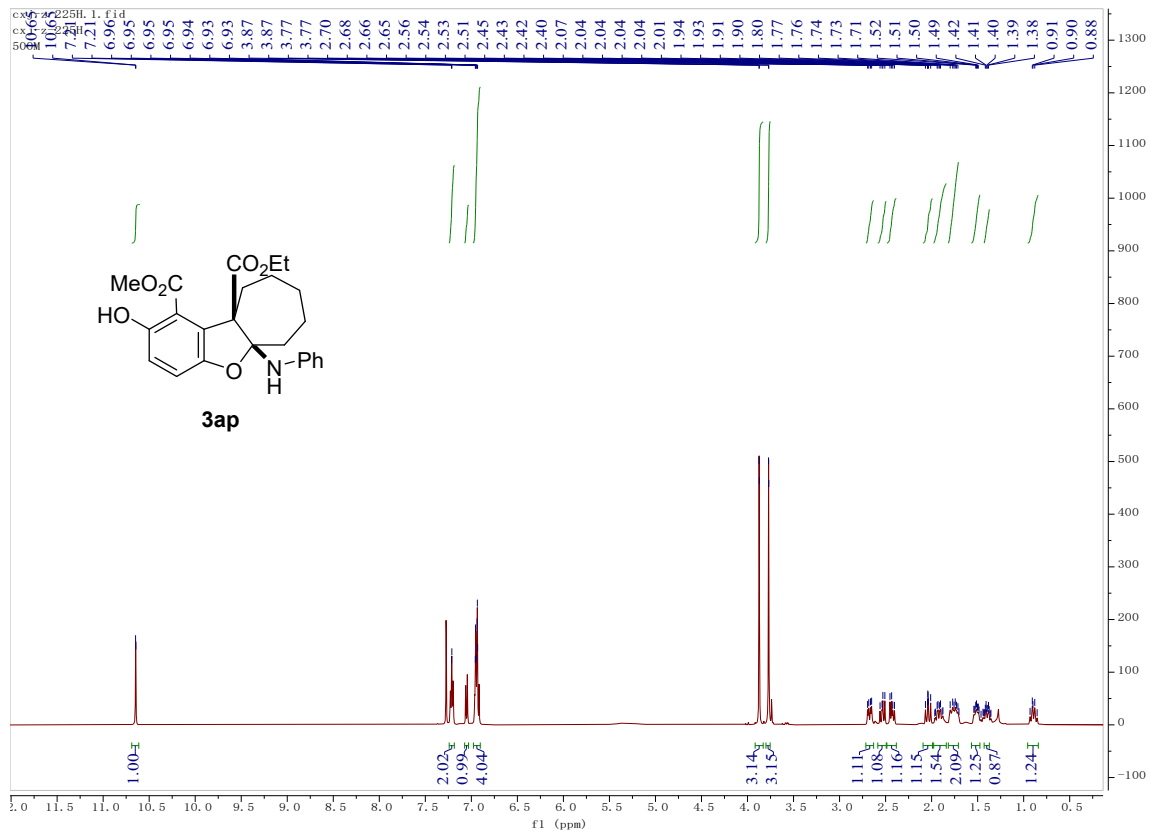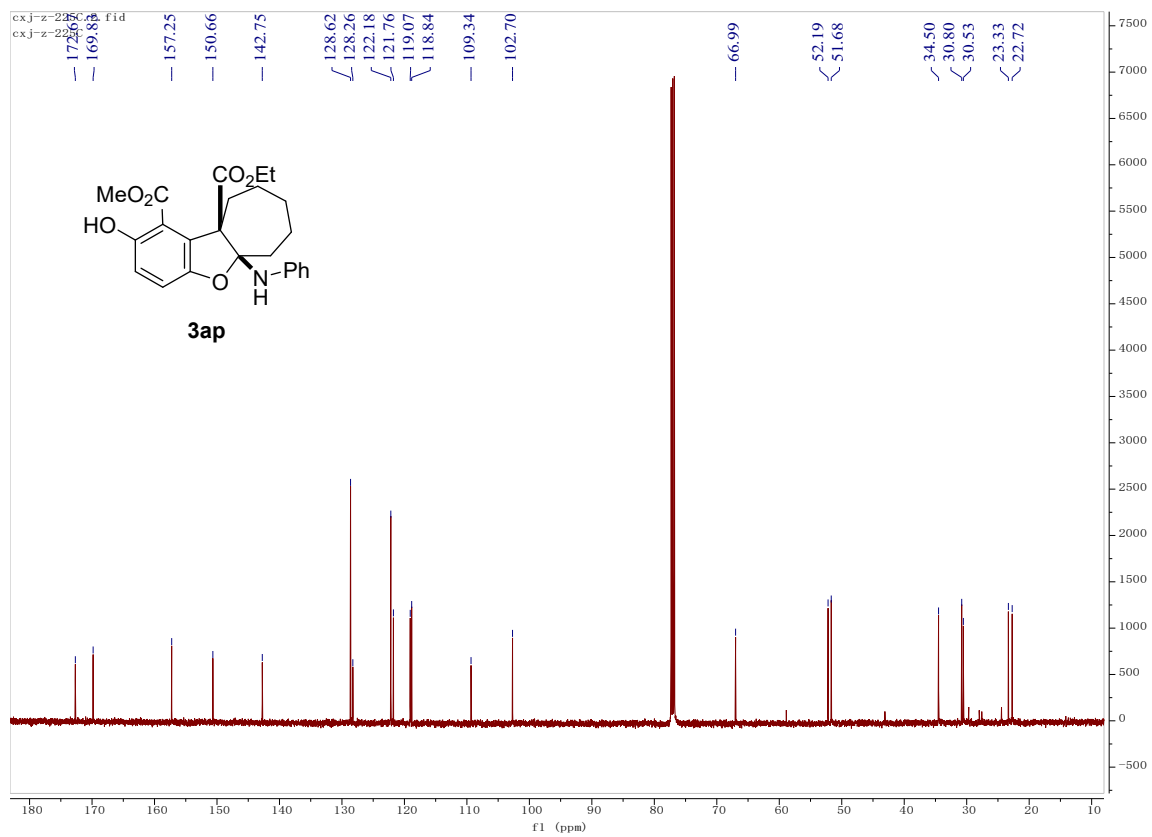

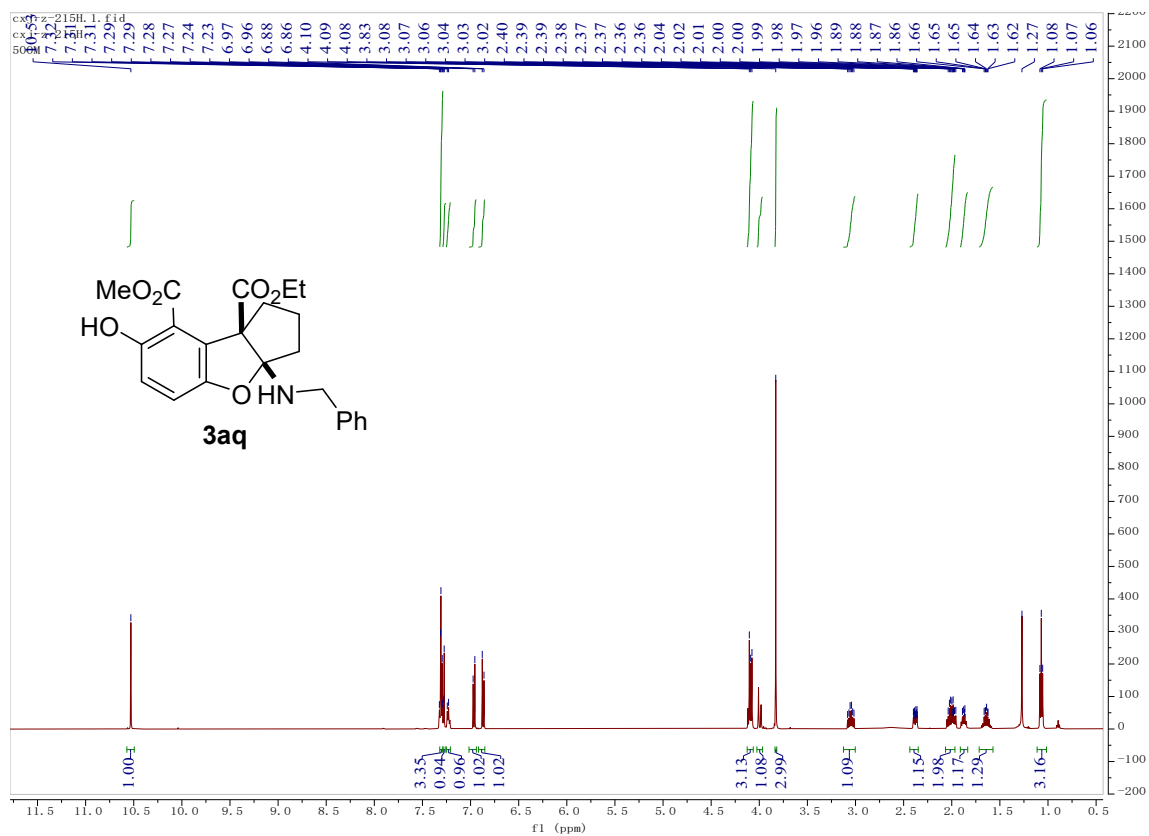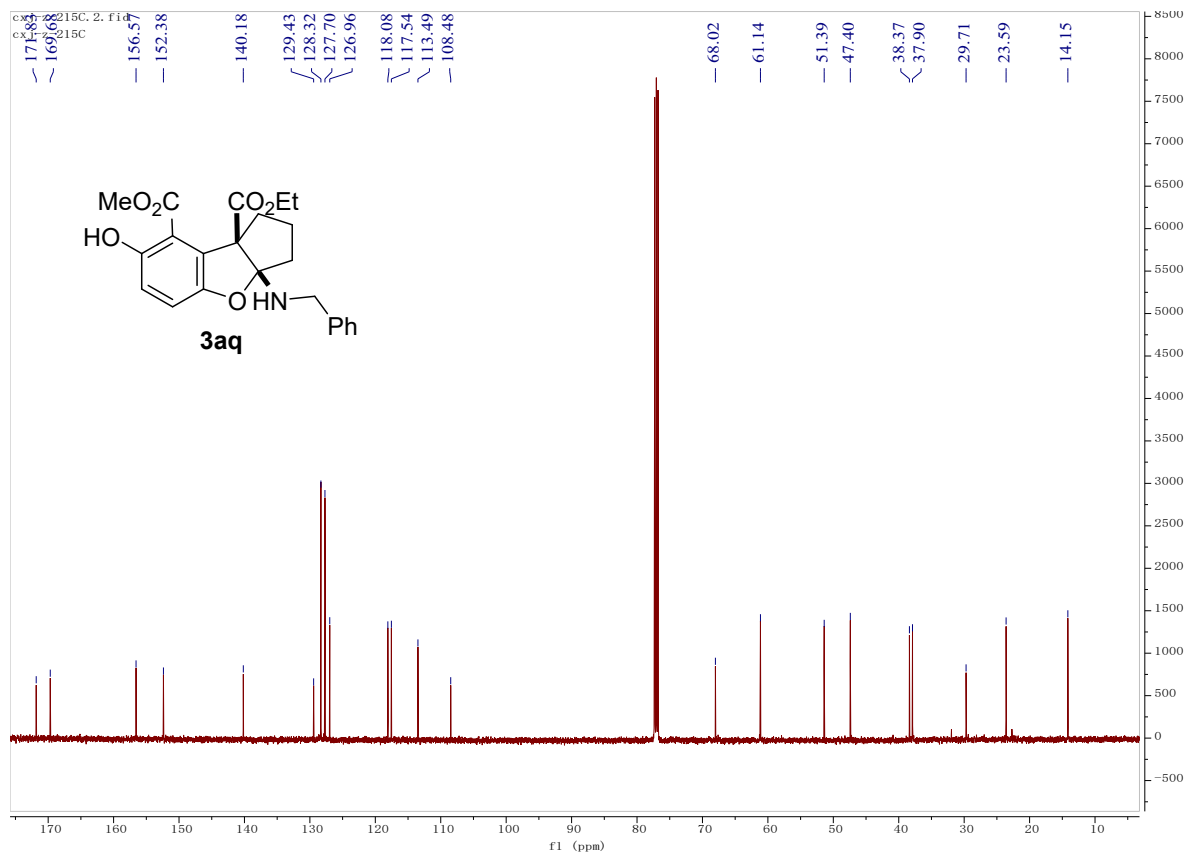

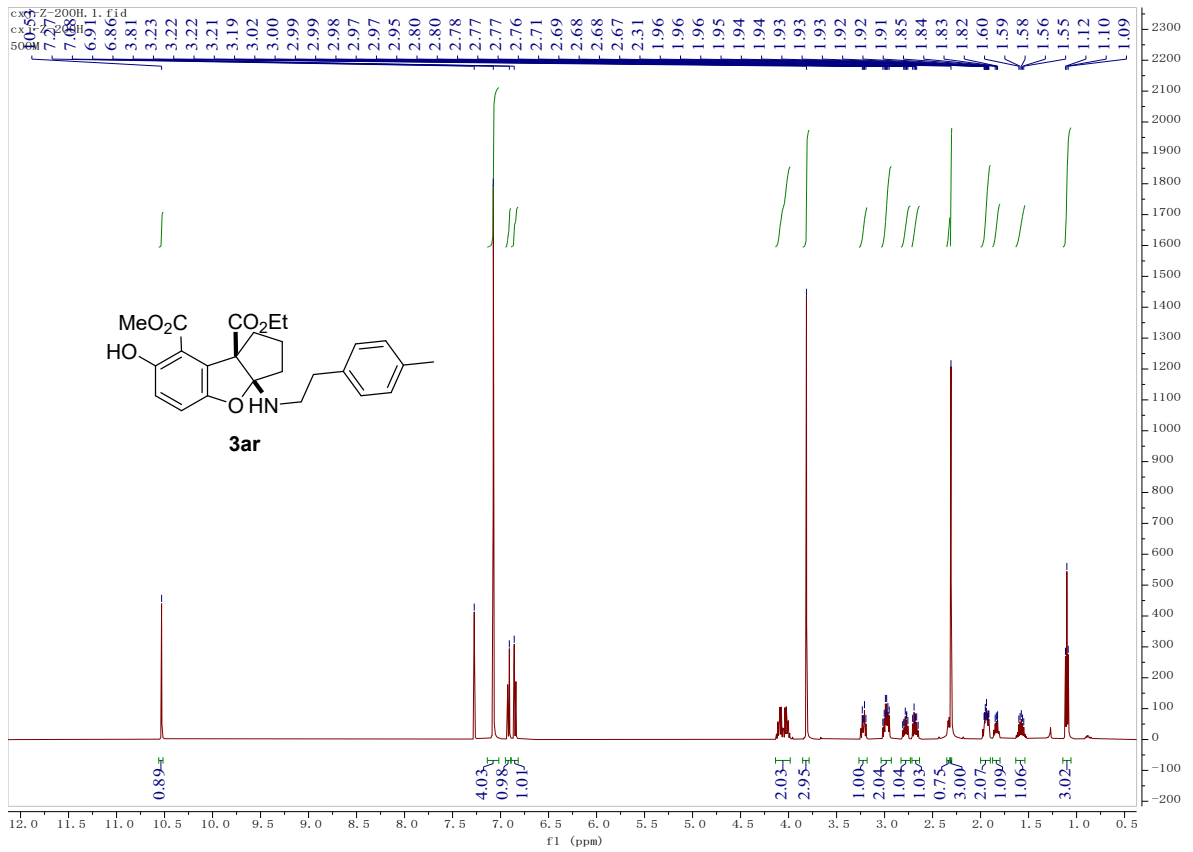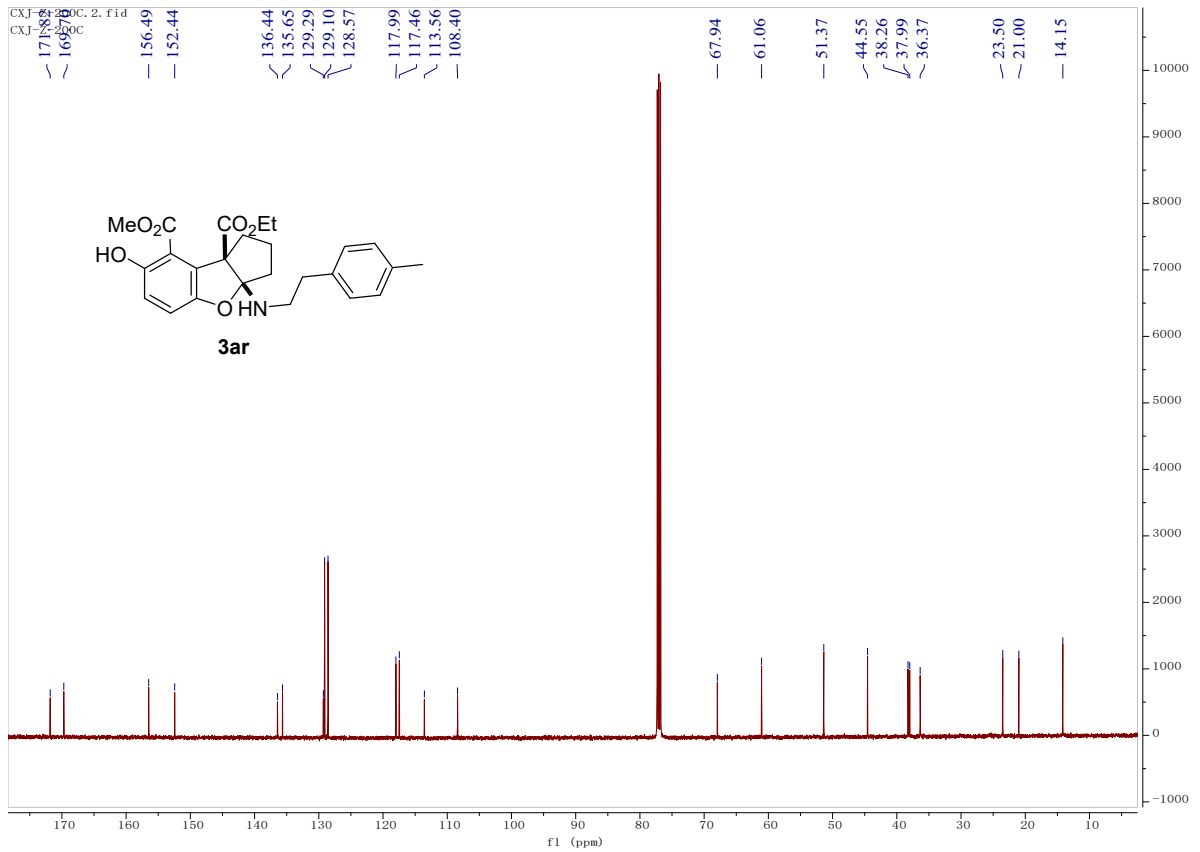

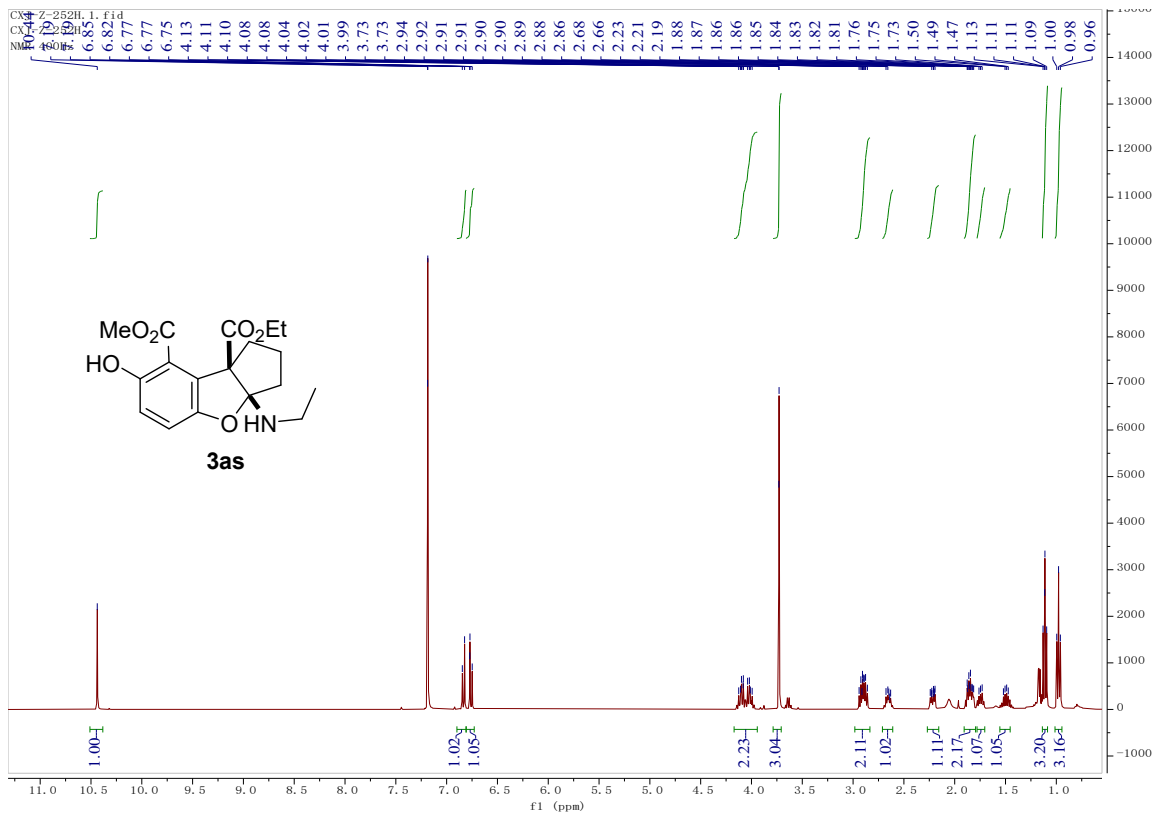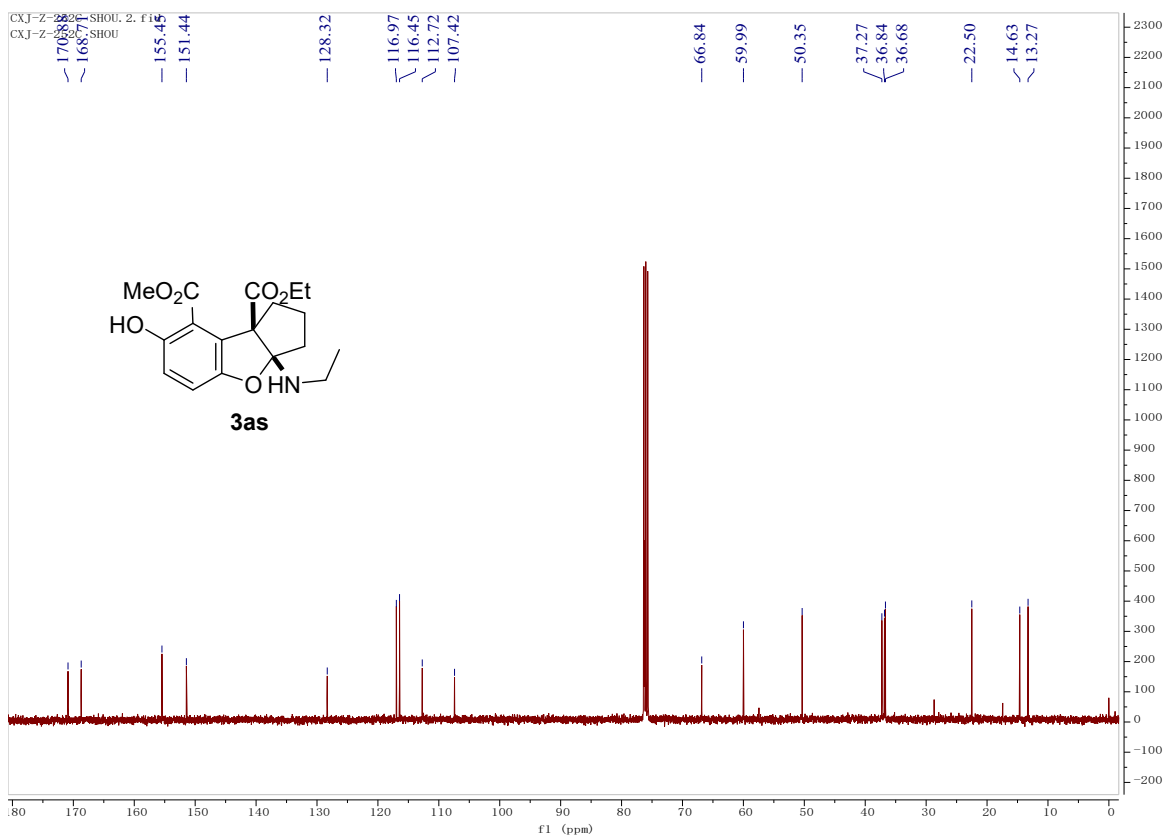

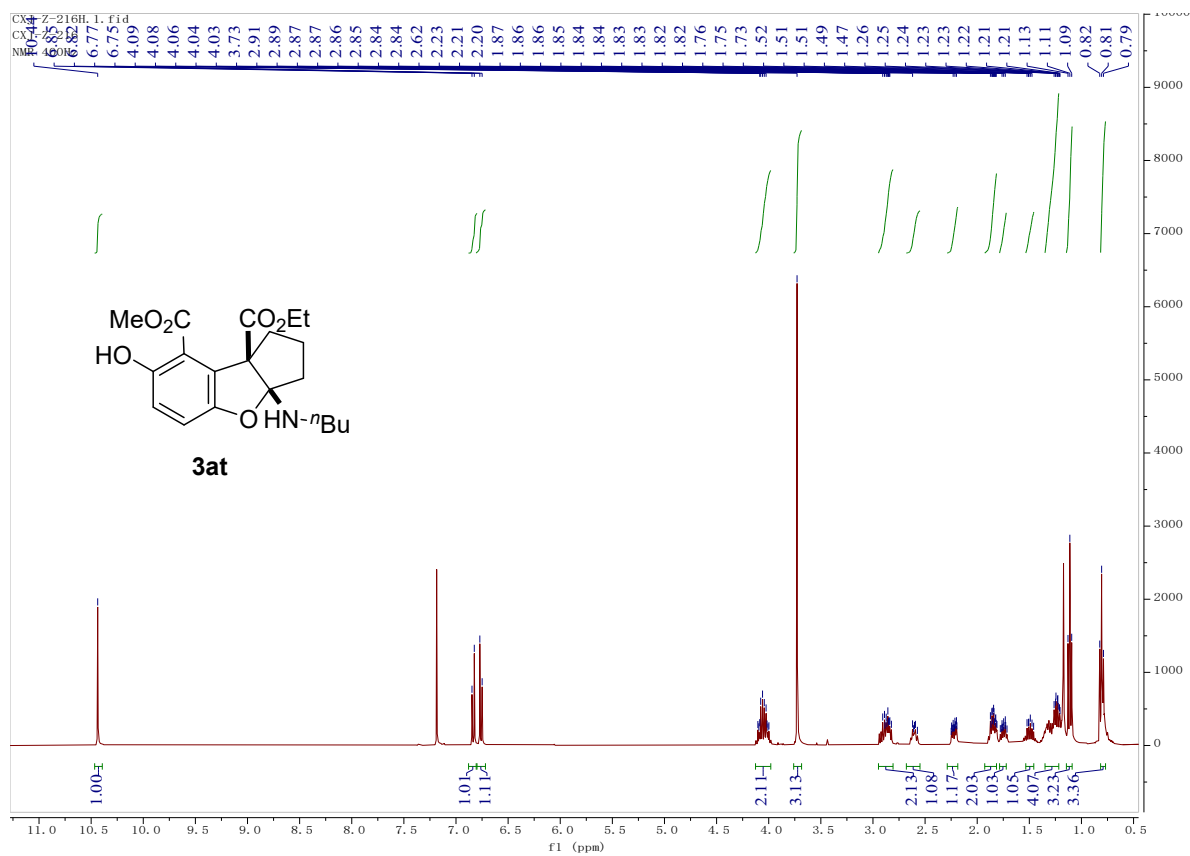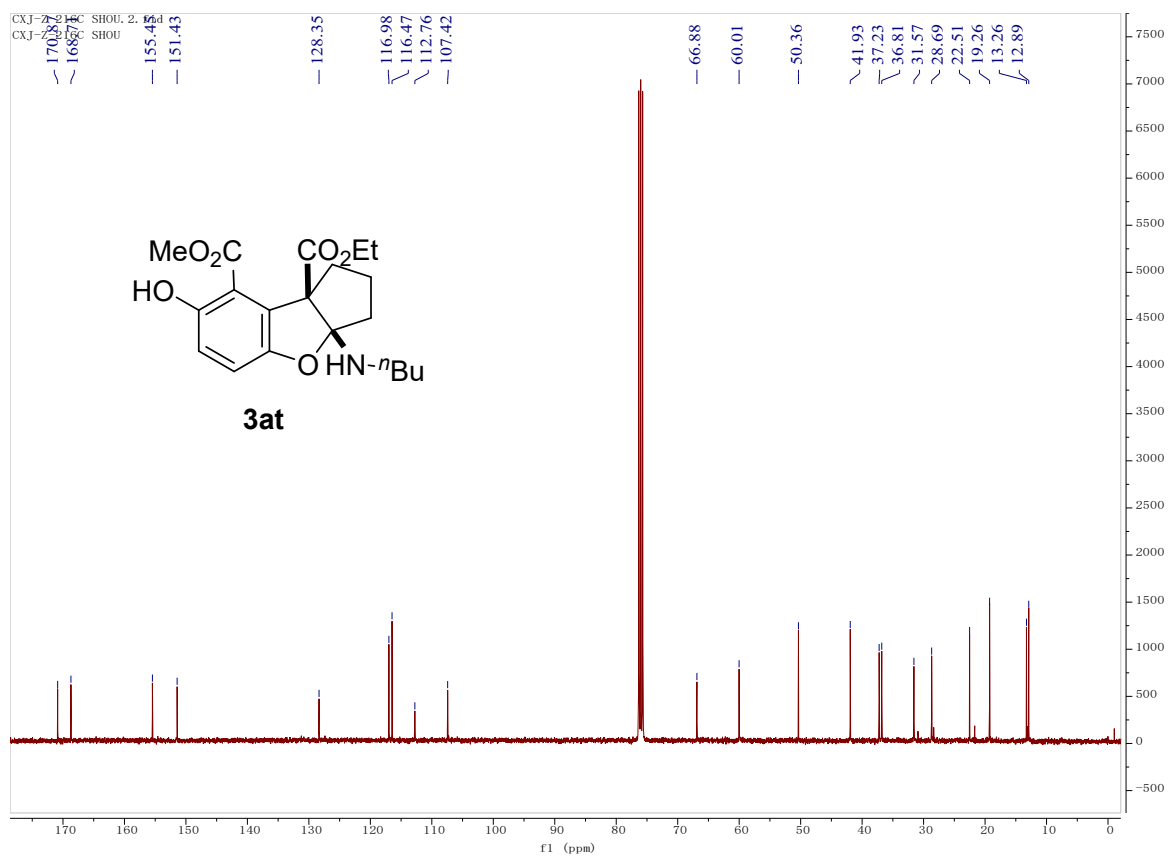

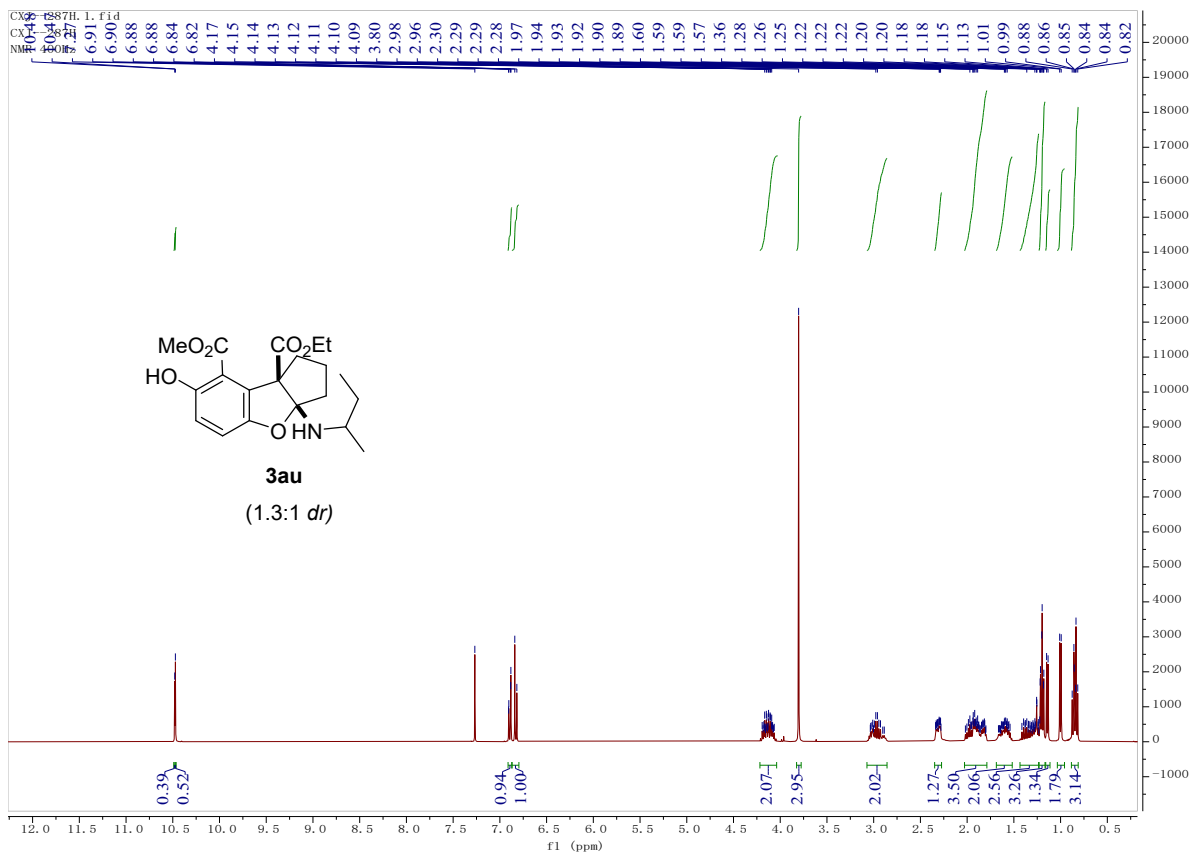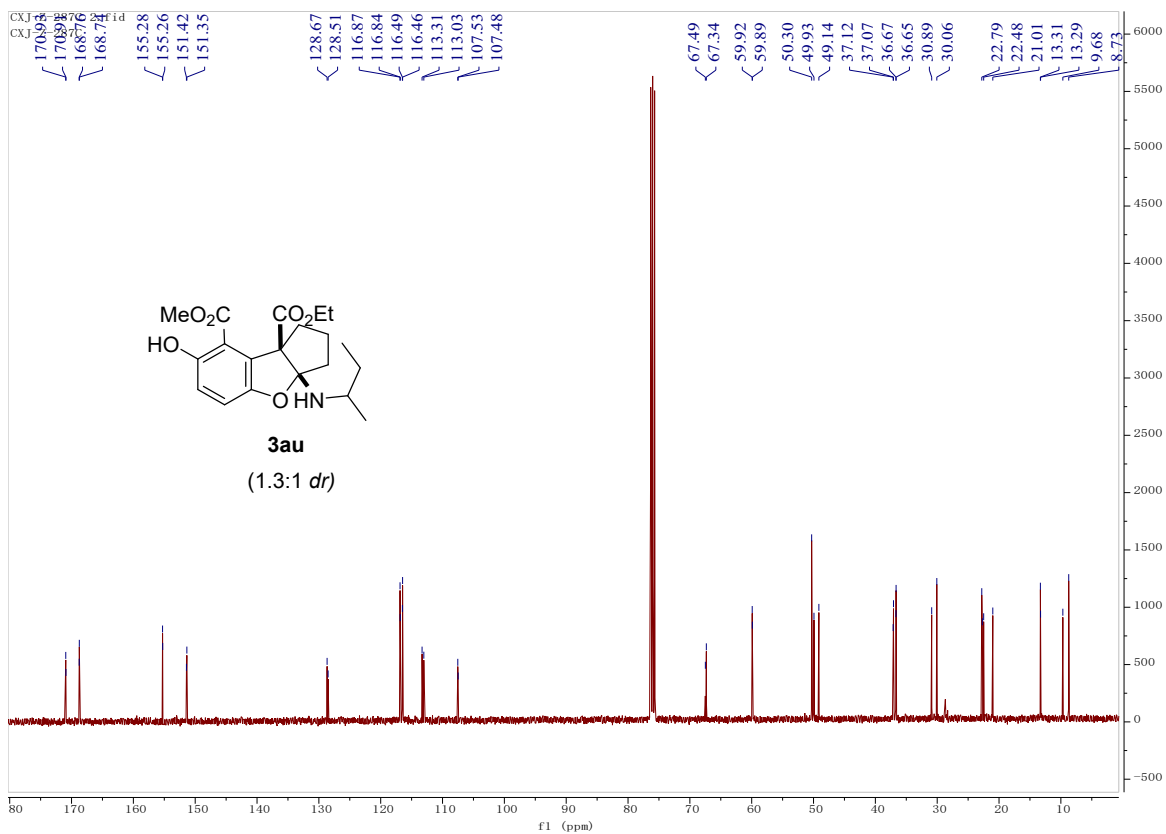



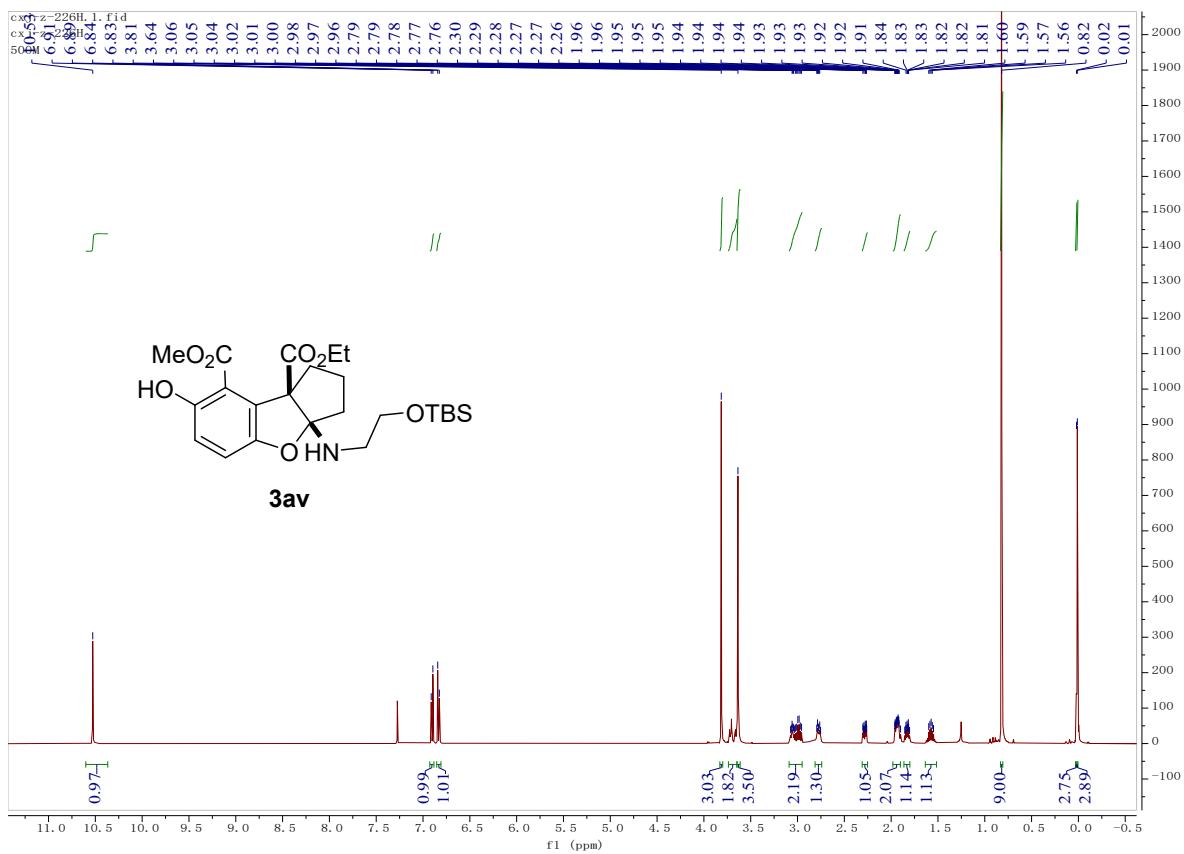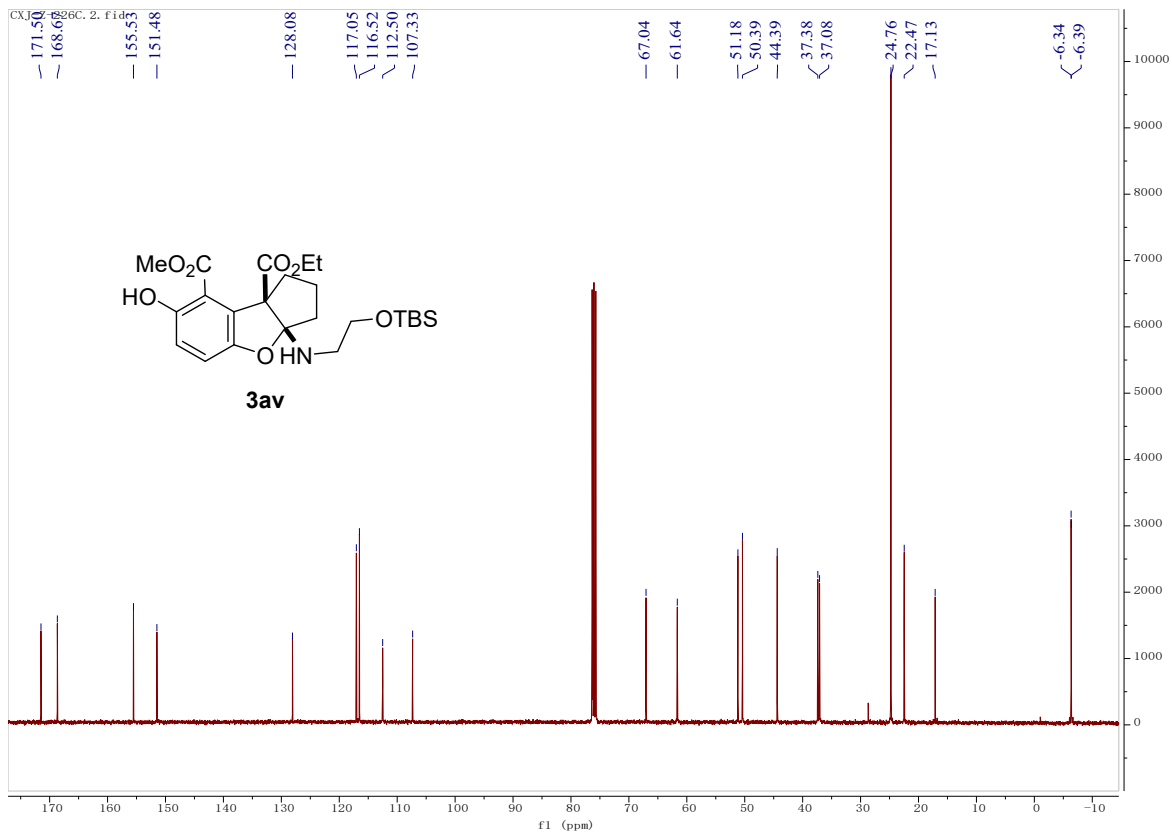

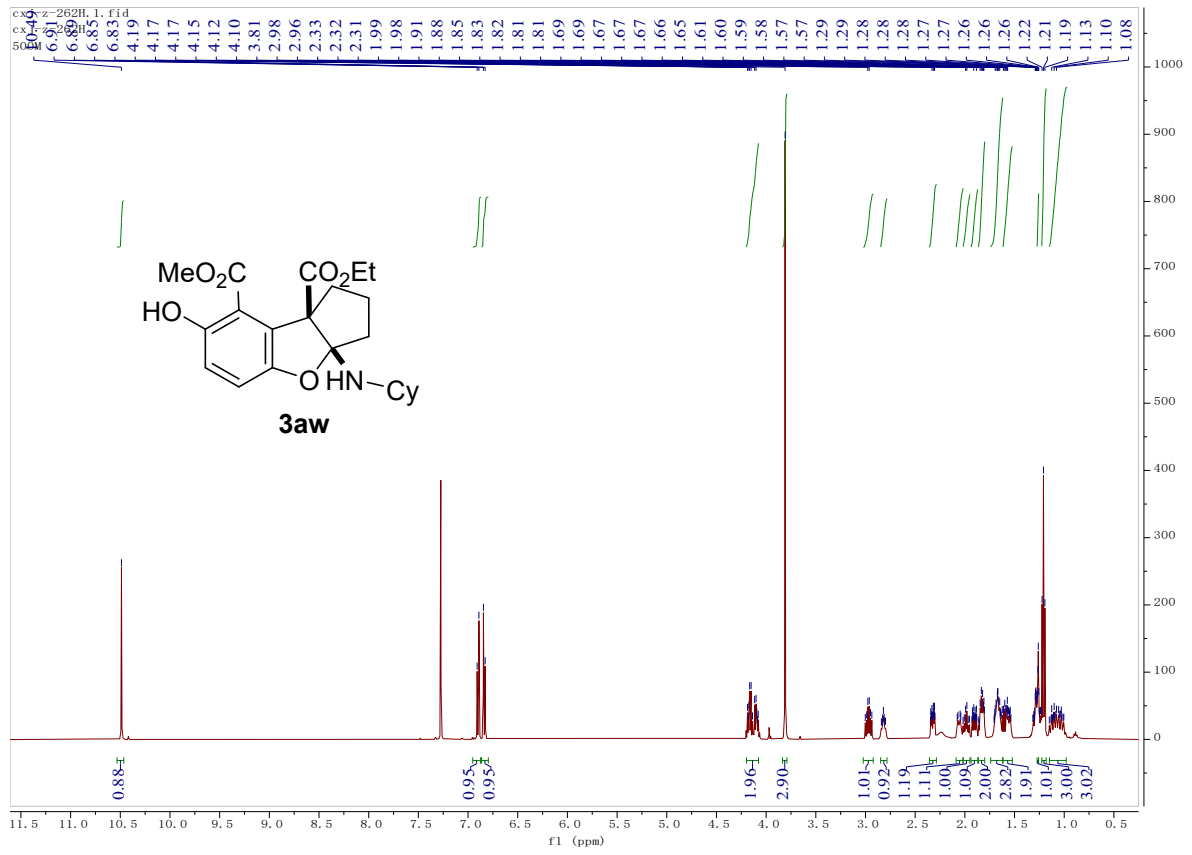

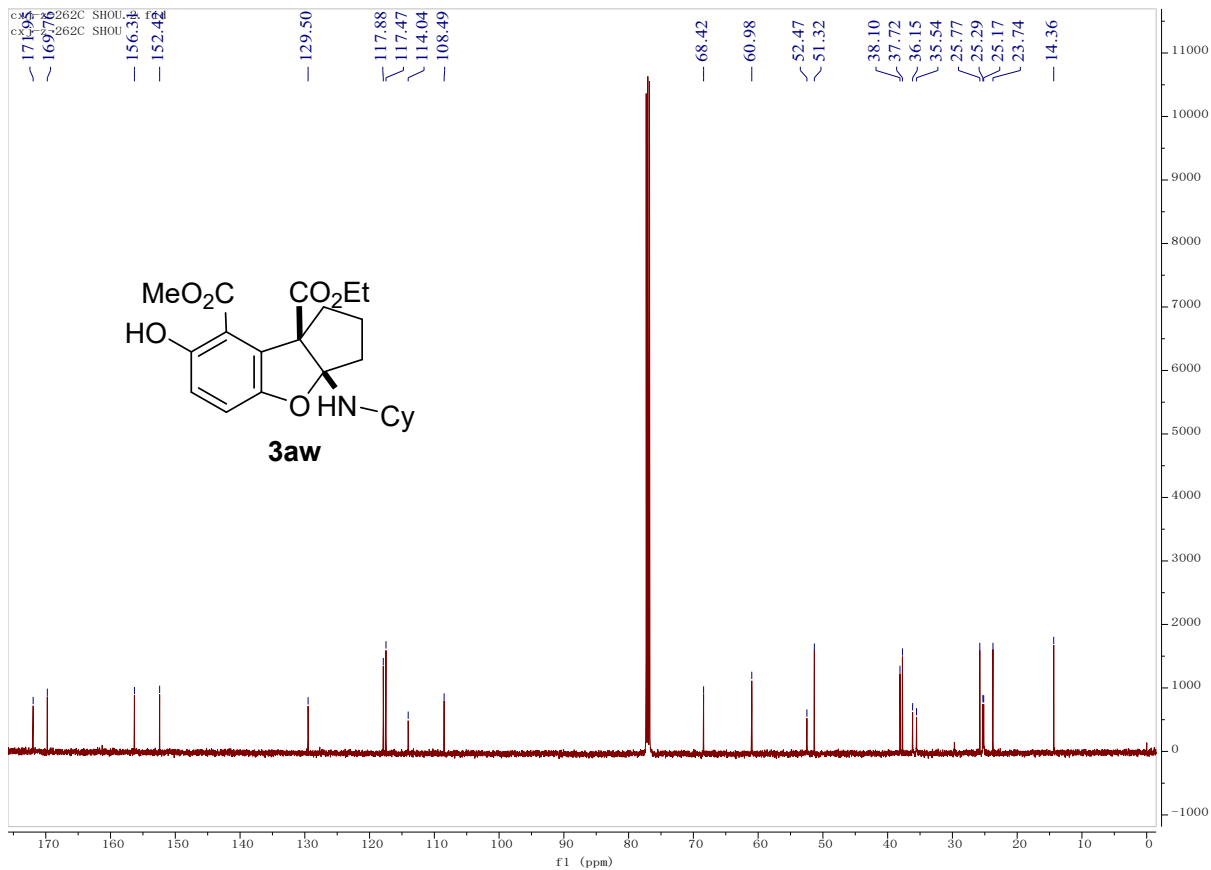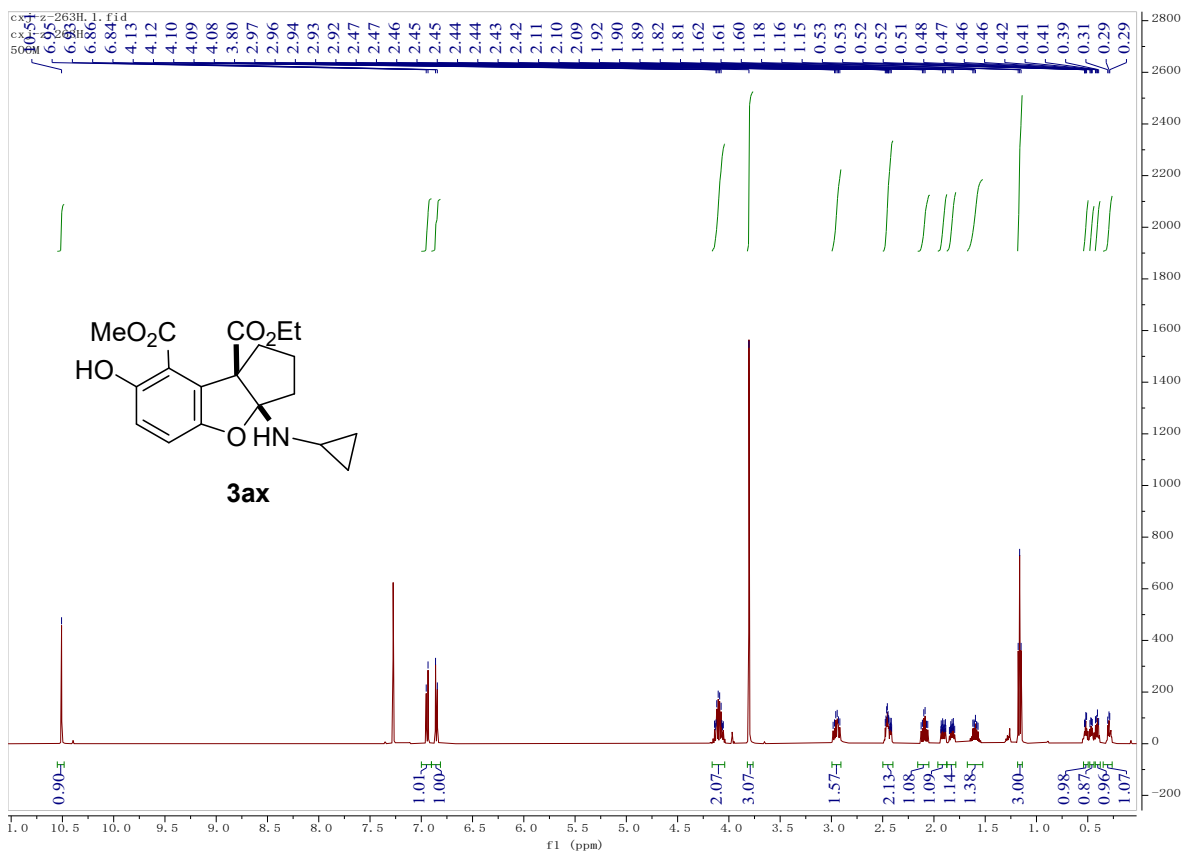

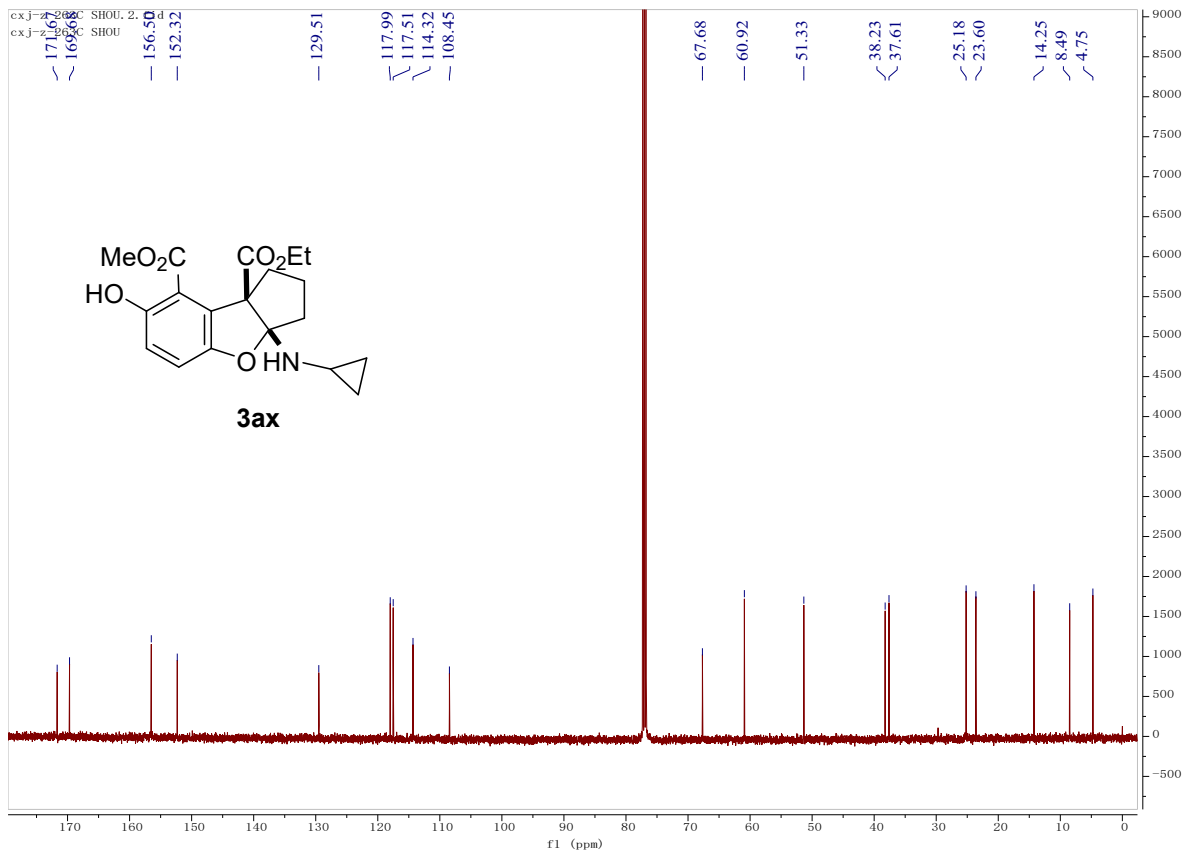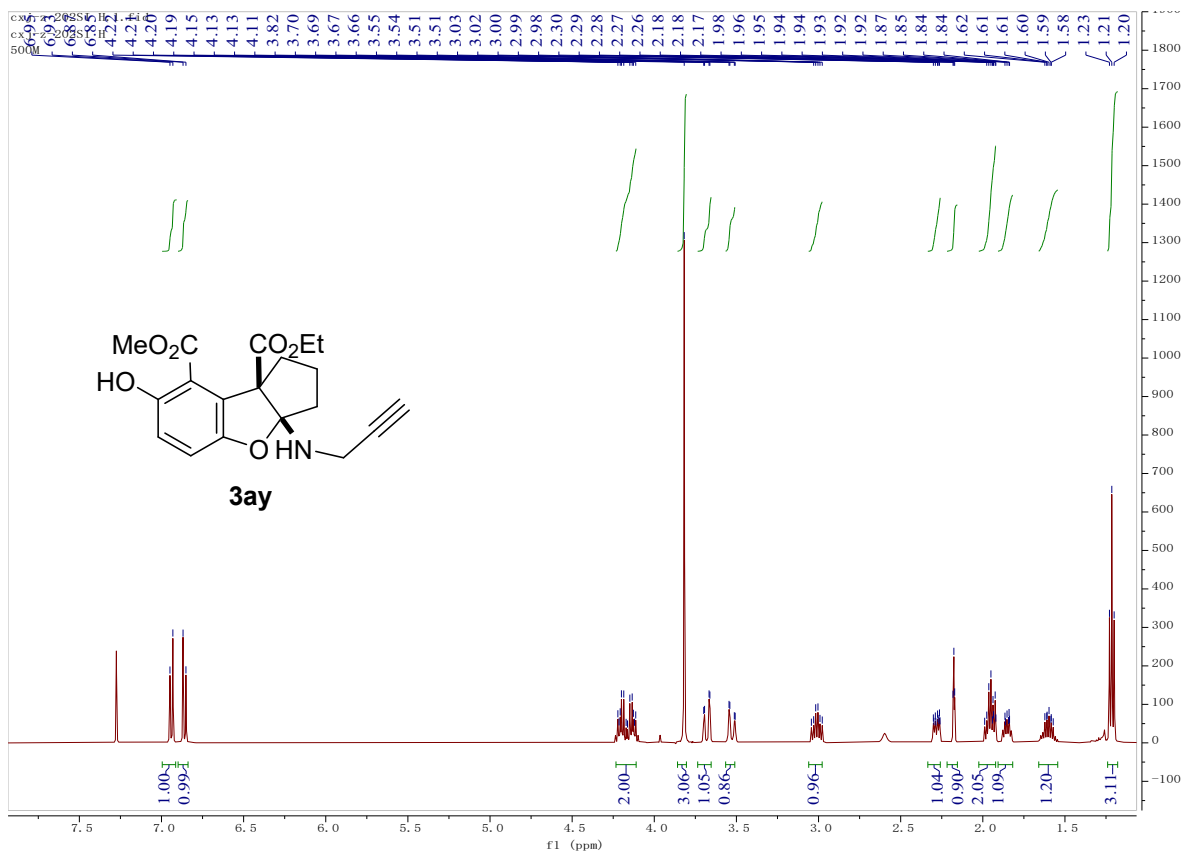

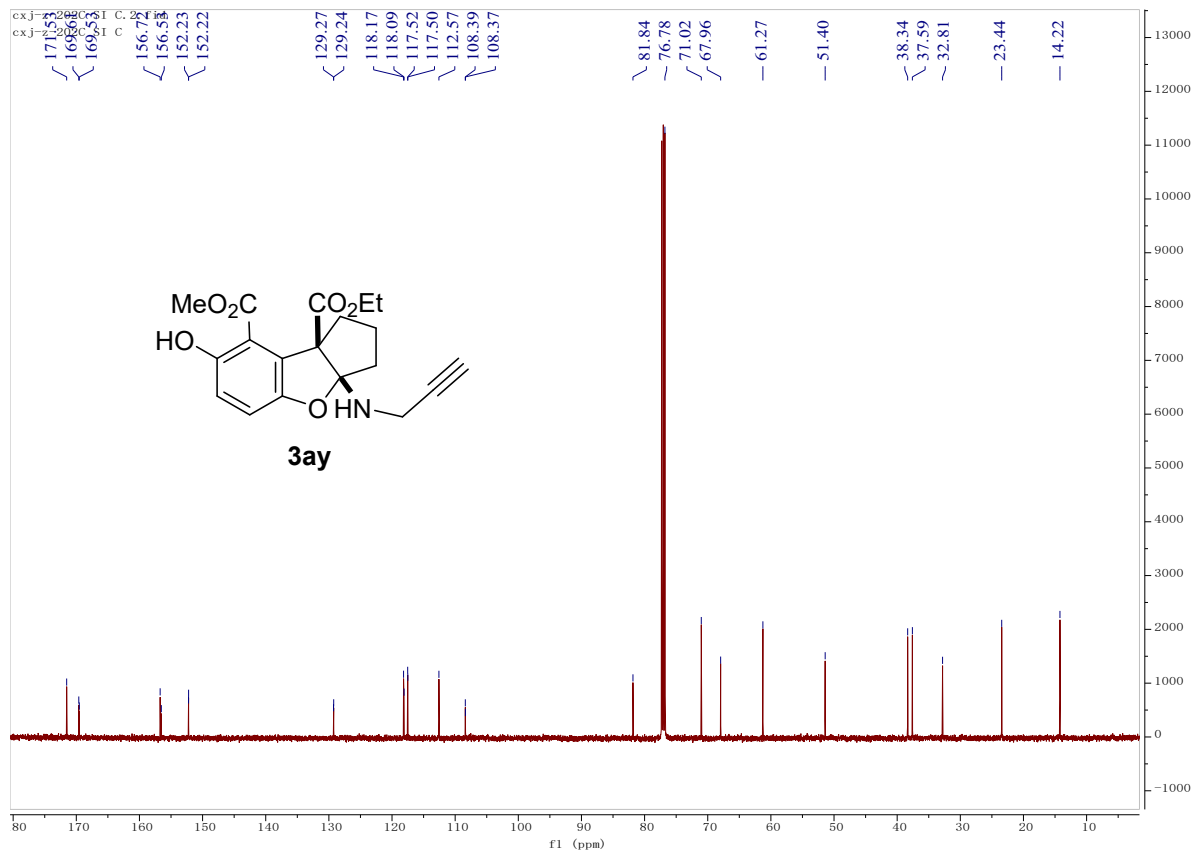

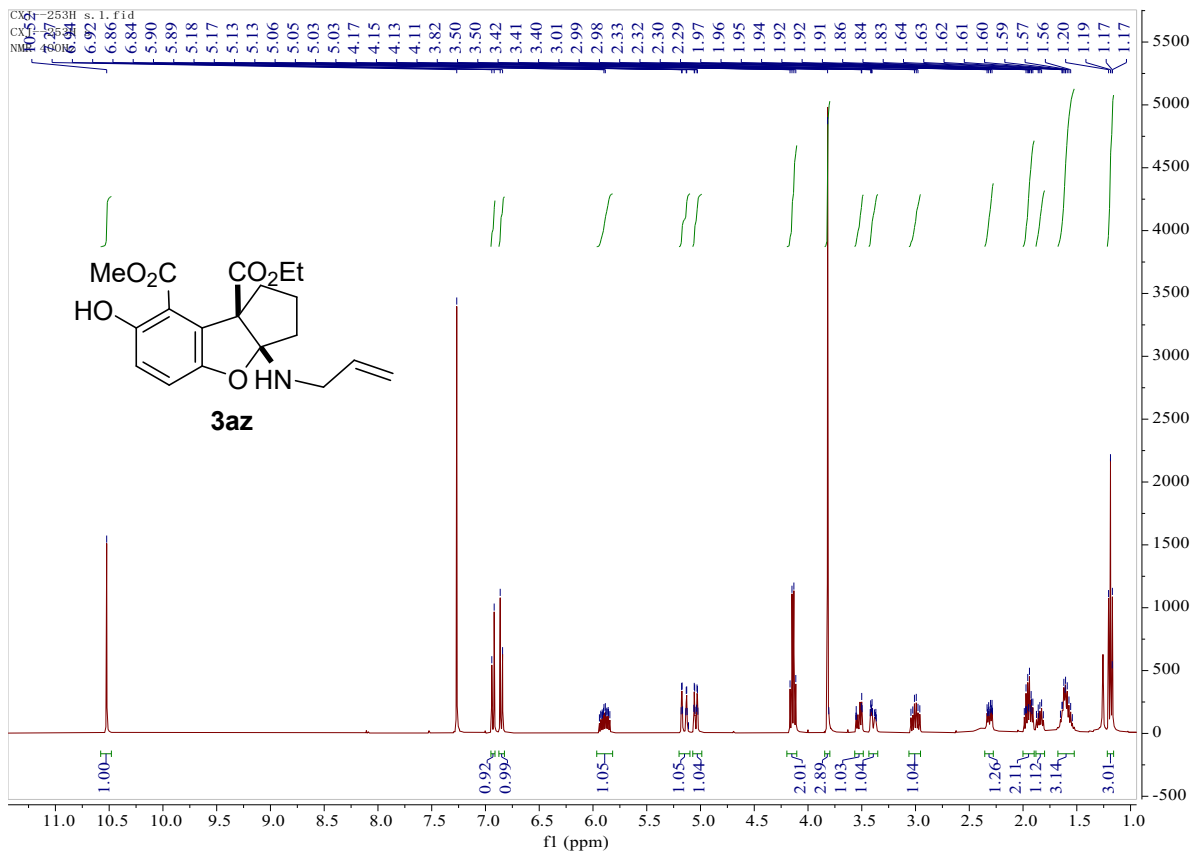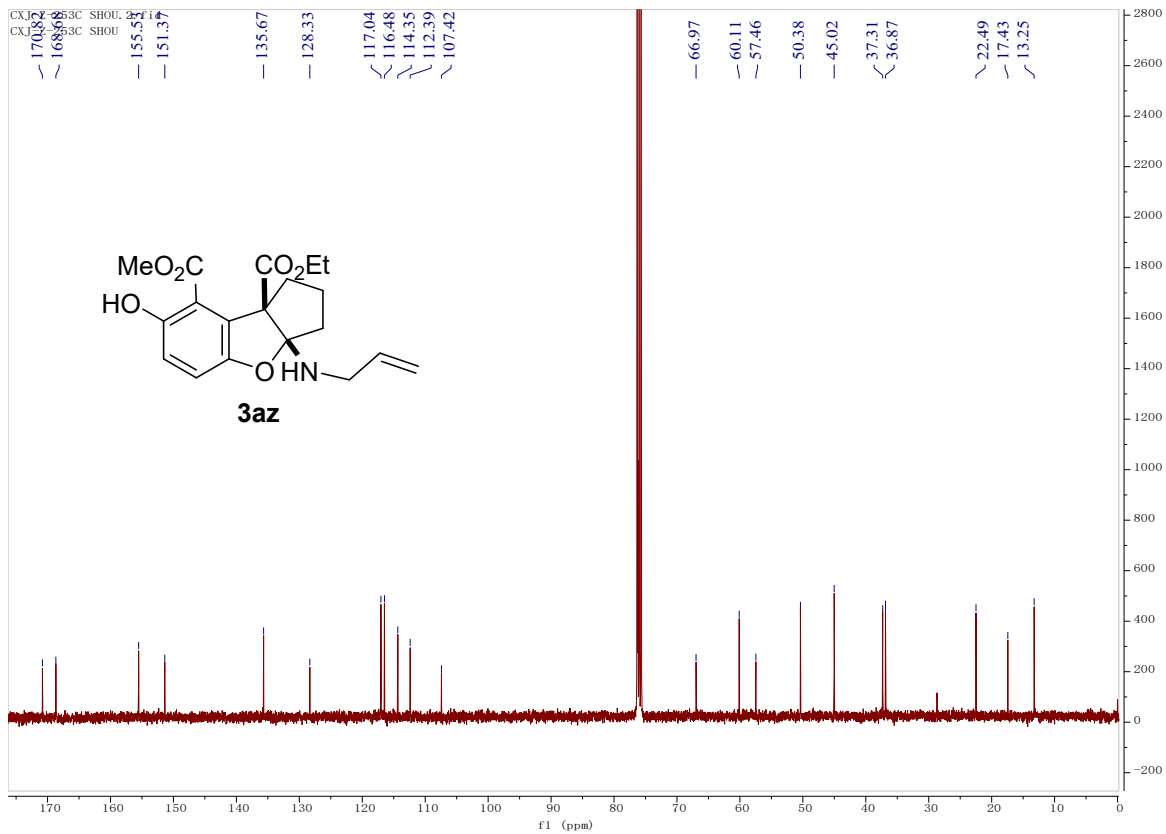

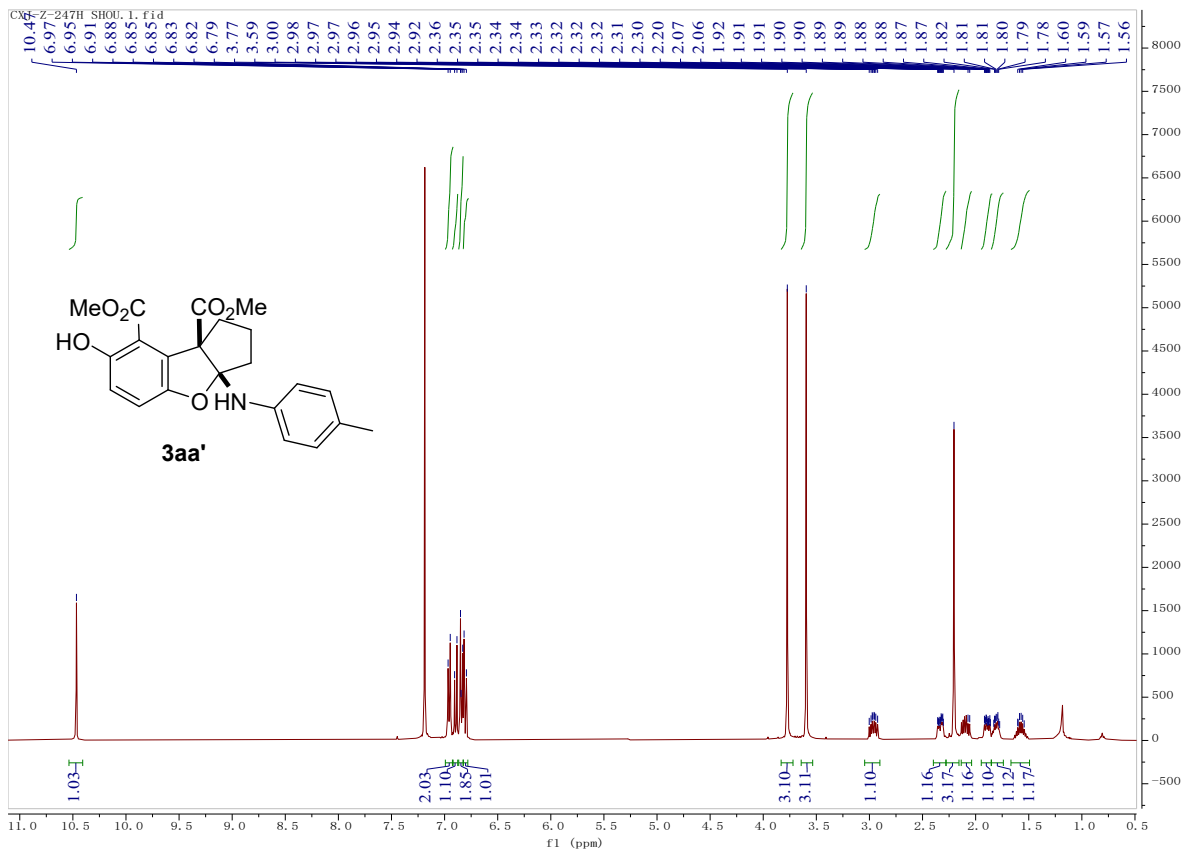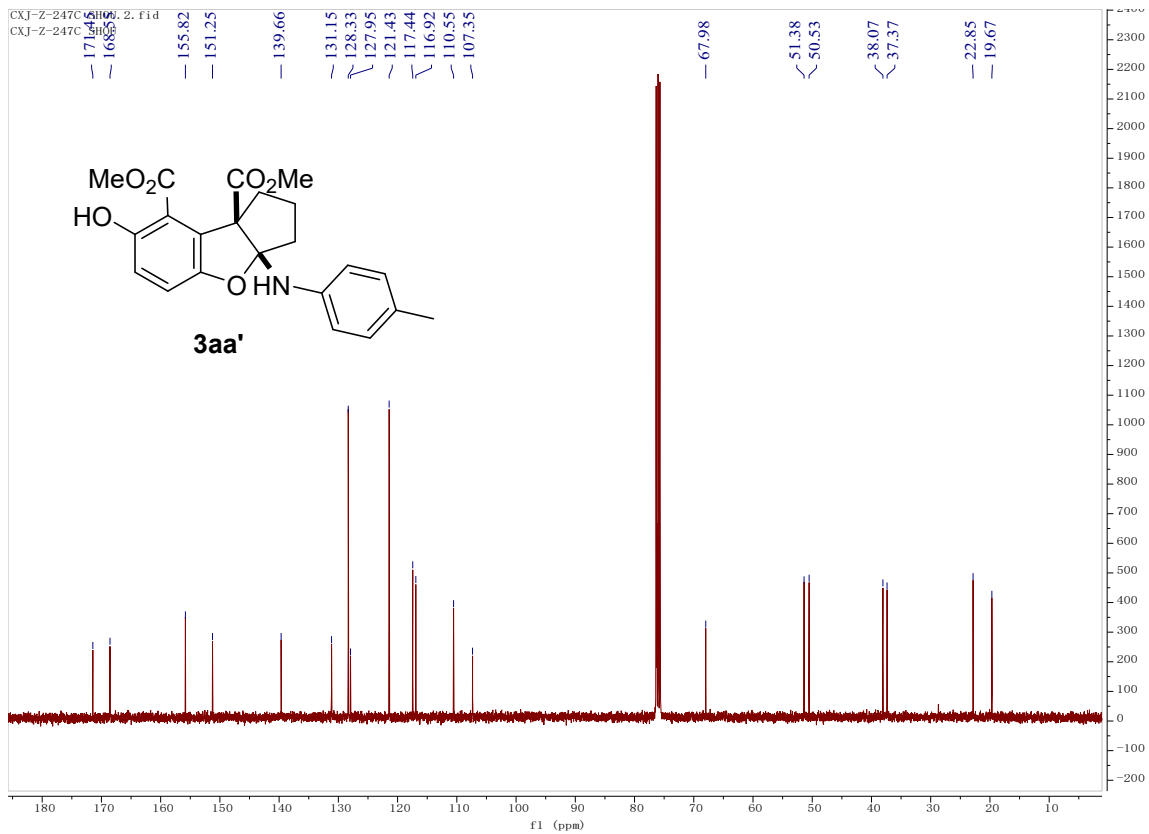

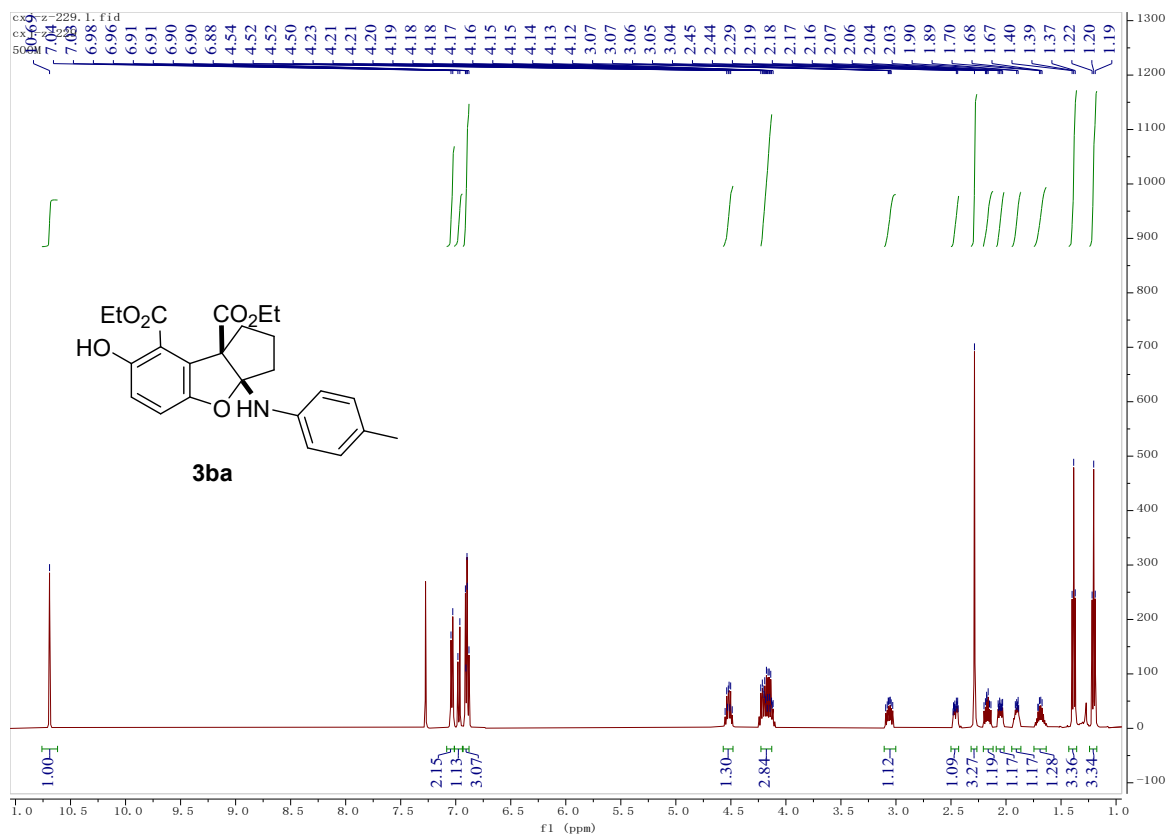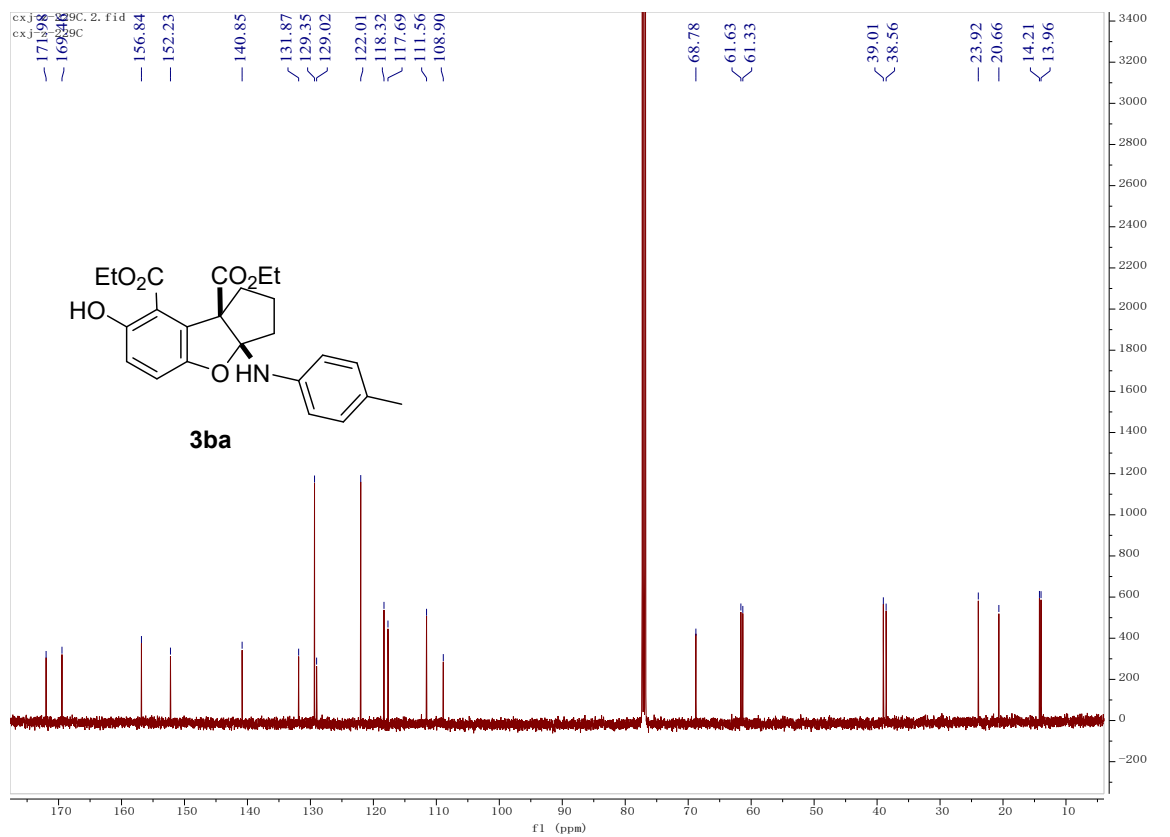



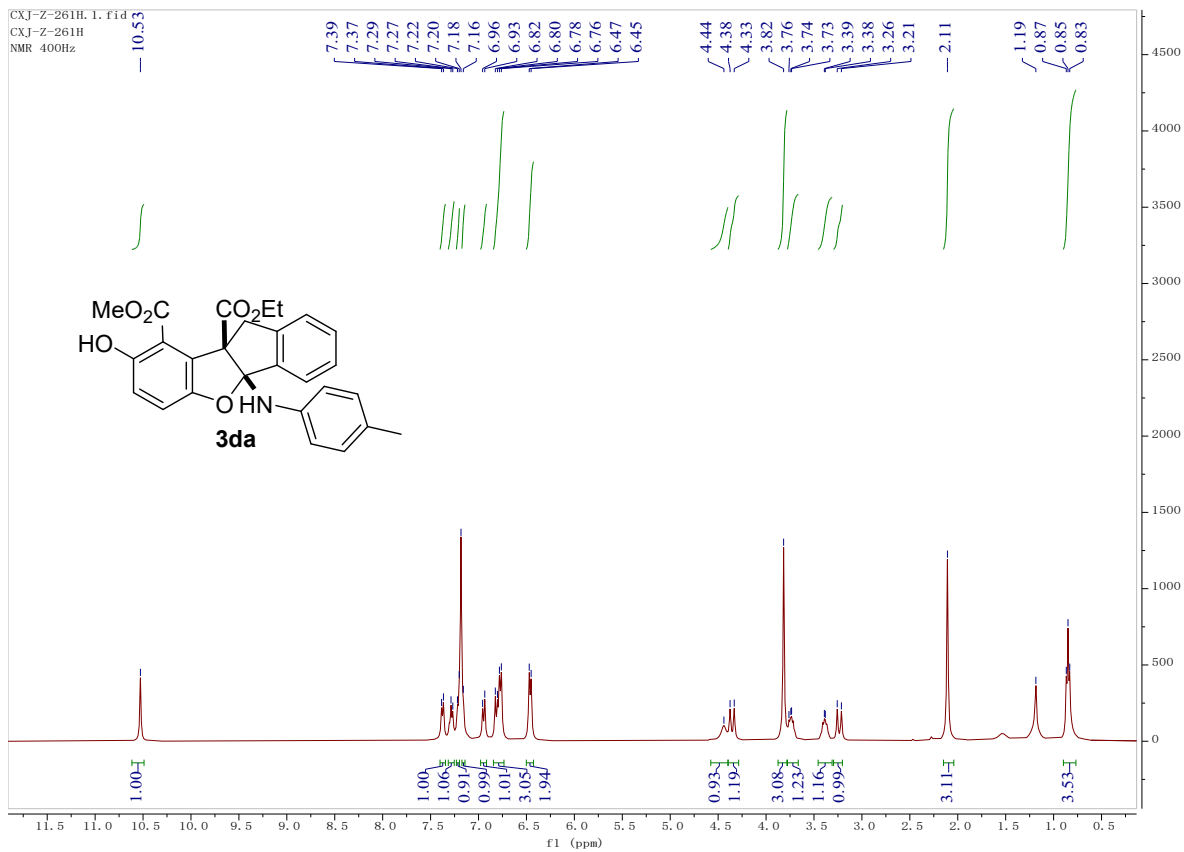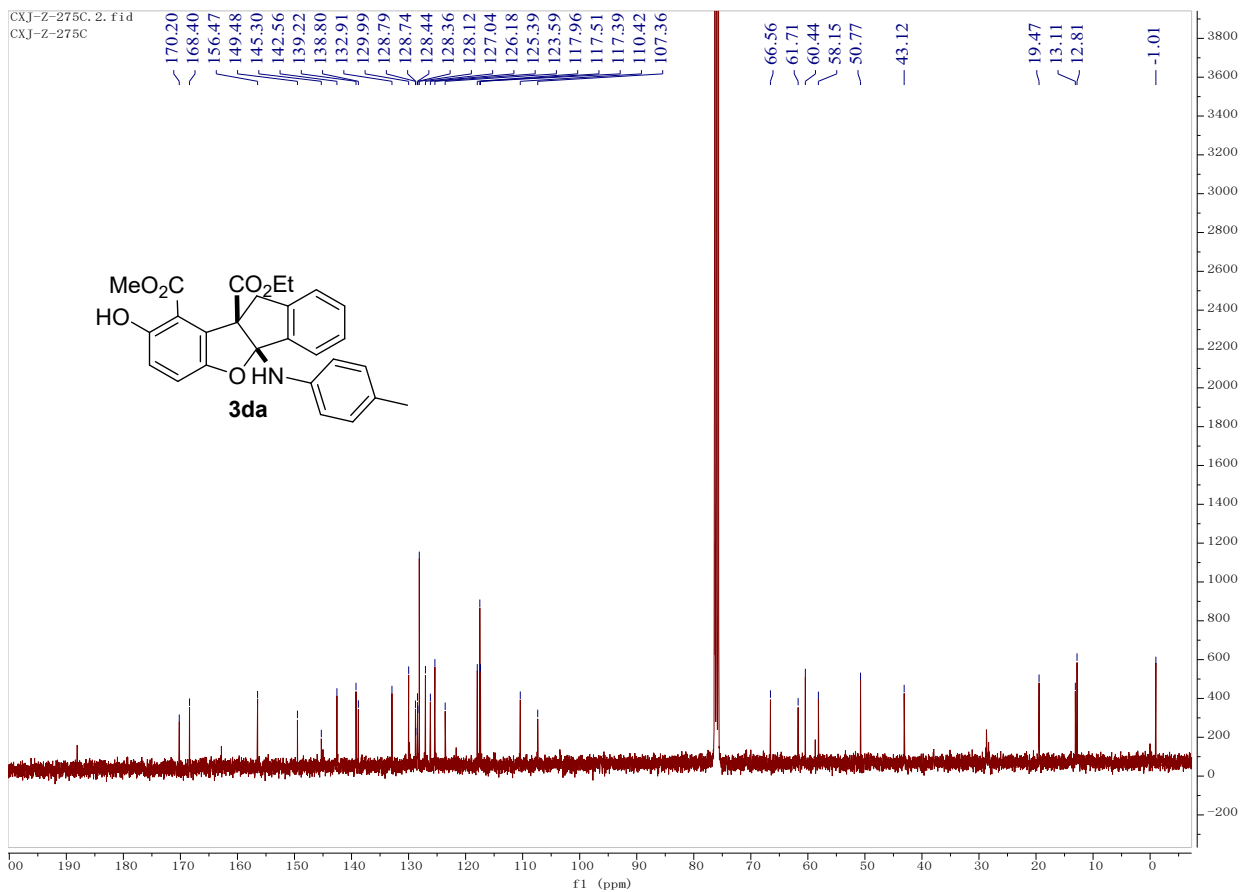

CXJ--Me 1.fid  
 CXJ--Me f1  
 NMR 400Hz

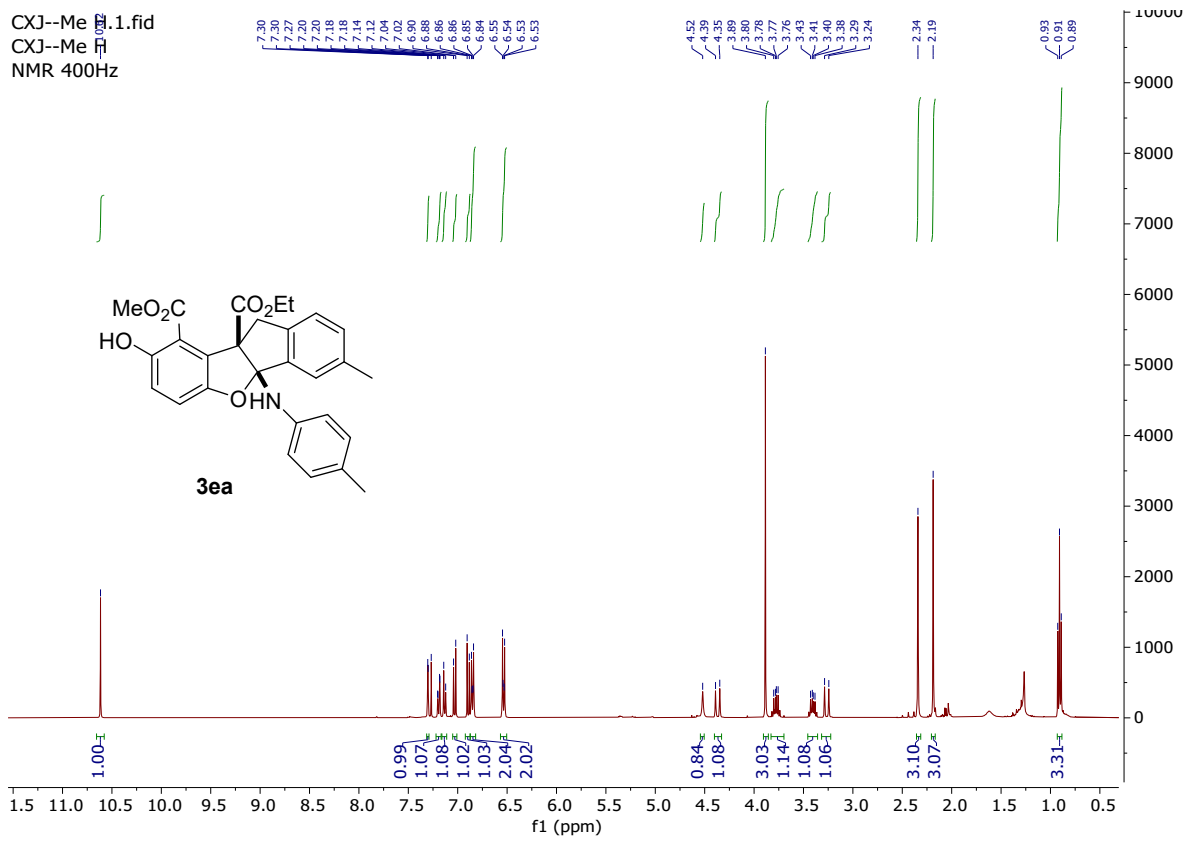

CXJ--Me C.2.fid  
 CXJ--Me C

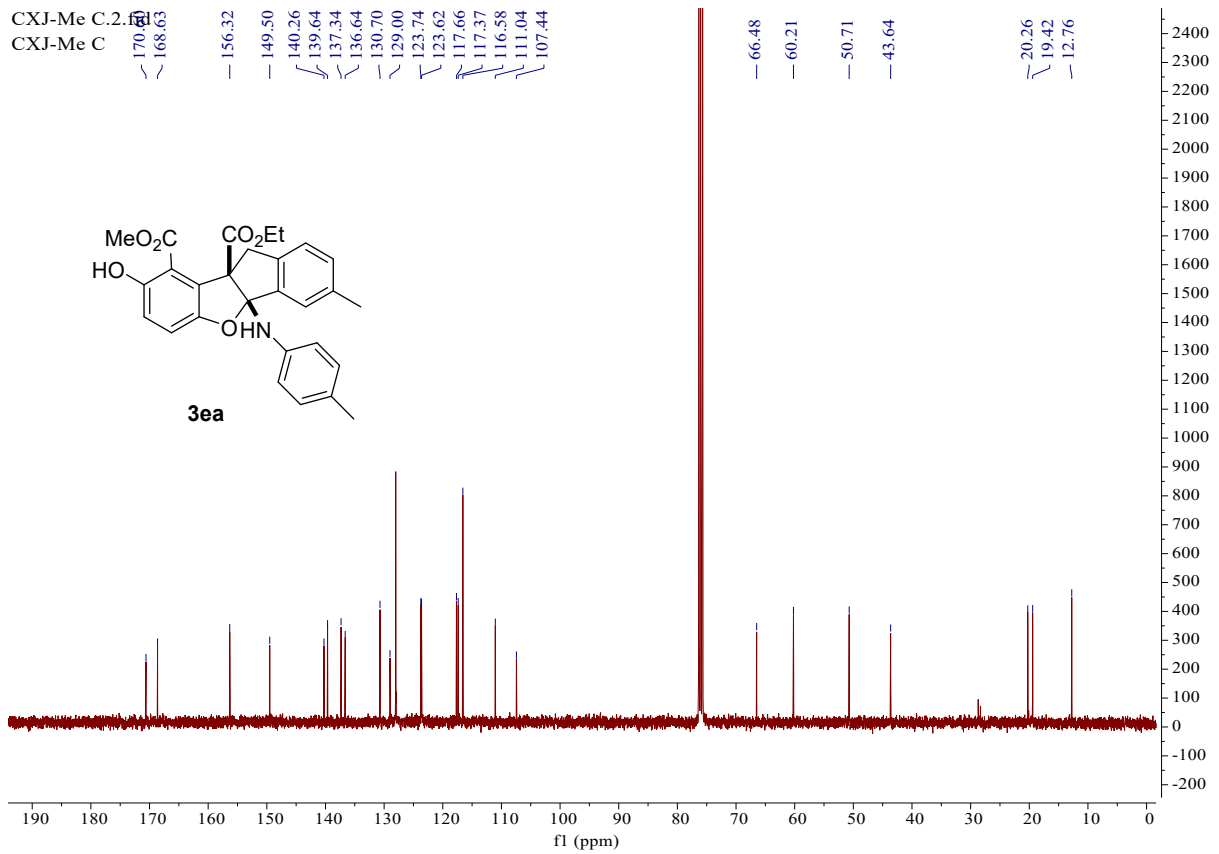

CXJ-Br H.1.fid  
CXJ-Br H  
NMR 400Hz

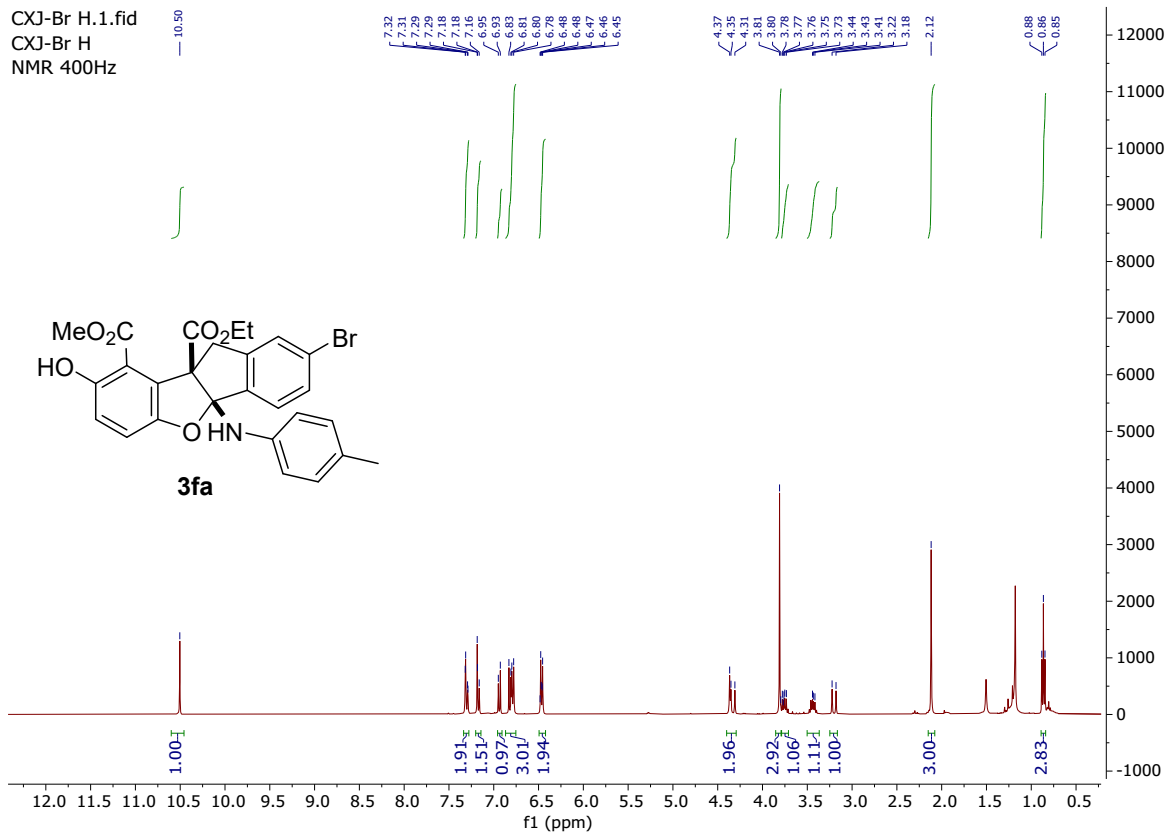

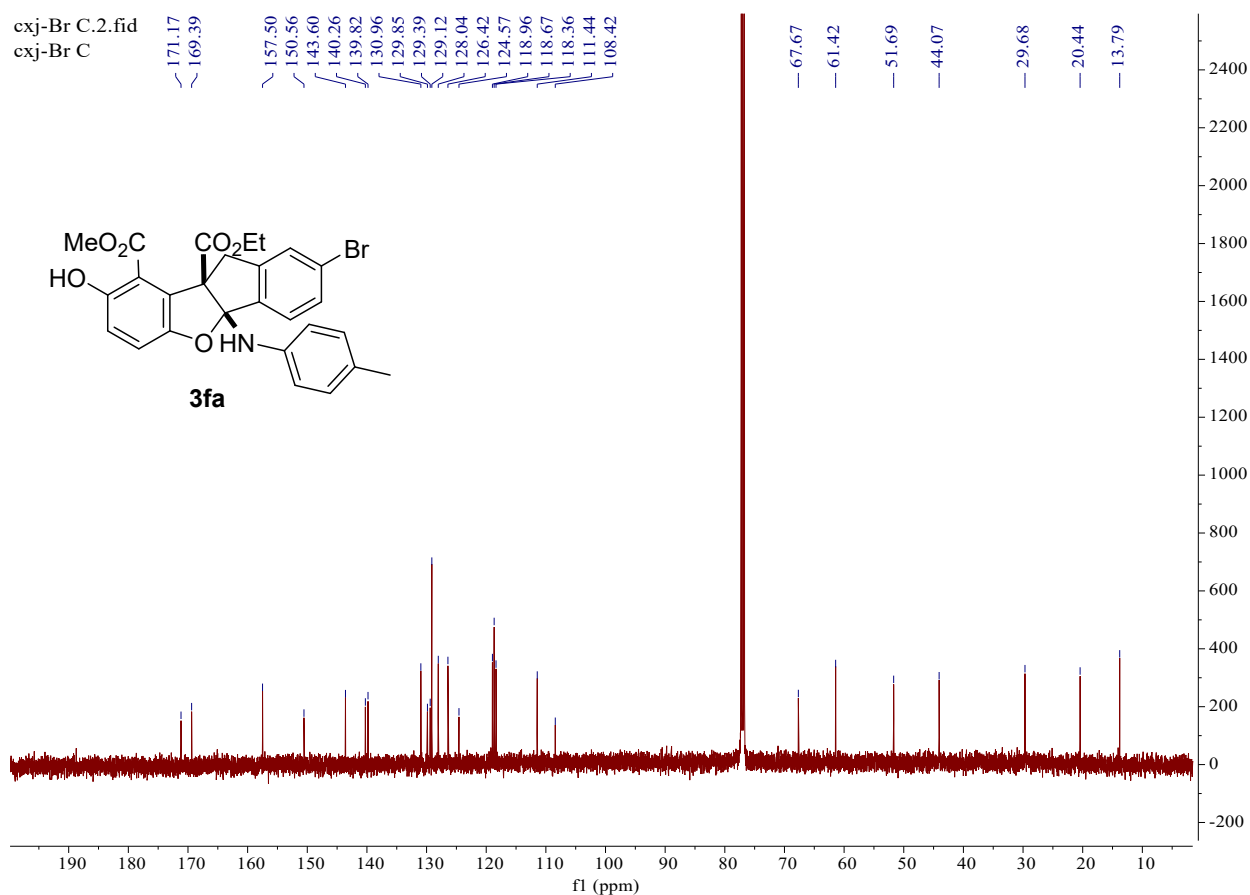

## 8. References

1. V. Sridharan, C. Avendaño and J. C. Menéndez, General, Mild and Efficient Synthesis of  $\beta$ -Enaminones Catalyzed by Ceric Ammonium Nitrate, *Synlett*, 2007, **8**, 1330-1330.
2. J. Larrow and E. Jacobsen, *Org. Synth.*, 1998, **75**, 1-11.
3. Y. Kouadri, M. Ouahrani, B. Missaoui, F. Chebrouk and N. Gherraf. *Asian J. Chem.*, 2015, **27**, 2575-2578.
4. Xiaozhou, Xie and Jiangtao, Sun. *Org. Lett.*, 2021, **23**, 8921–8925.
5. Charles A. Eckerta and Charles L. Liotta. *Green Chem.*, 2014, **16**, 2147–2155.
6. B. Muschalek et al. *J. Organometallic. Chem.*, 2007, **692**, 2415–2424.
